# Supplementary material for: Liver cancer cell lines distinctly mimic the metabolic gene expression pattern of the corresponding human tumours
Source: J Exp Clin Cancer Res. 2018 Sep 3;37:211. doi: 10.1186/s13046-018-0872-6 (PMC6122702; doi:10.1186/s13046-018-0872-6)
Supplement: Supplementary file 7 — Table S6. Proteomics profile of HUH7 vs HLE cell lines. Expression pattern of proteins for which at least 2 peptides were detected in the cell lines after 48 h culture. When compared, 797 proteins emerged as more expressed in HLE cells whereas 616 proteins were more expressed in HUH7 (adjusted P < 0.05). Also included are 475 proteins indistinctly expressed under the same conditions. (XLSX 260 kb) [file 13046_2018_872_MOESM7_ESM.xlsx]

## Sheet: More expressed in HLE
Accession	Peptide.count	Unique.peptides	Confidence.score	Max.fold.change	Highest.mean.condition	Lowest.mean.condition	Description	p.ANOVA.FDR	p.ANOVA	Name		Consistently altered metabolic genes identified in human HCC that their encoded protein is differentially upregulated (n=59)
P80723	4	4	167.82	981.901	HLE	Huh7	Brain acid soluble protein 1 OS=Homo sapiens GN=BASP1 PE=1 SV=2 - [BASP1_HUMAN]	1.00136e-12	1.45389e-14	BASP1		ADA
O75746	3	2	83.23	223.837	HLE	Huh7	Calcium-binding mitochondrial carrier protein Aralar1 OS=Homo sapiens GN=SLC25A12 PE=1 SV=2 - [CMC1_HUMAN]	1.37835e-05	4.90303e-06	SLC25A12		MBOAT7		Proteins are selected based on p.ANOVA.FDR < 0.05, total number = 797
P52943	2	2	72.62	152.274	HLE	Huh7	Cysteine-rich protein 2 OS=Homo sapiens GN=CRIP2 PE=1 SV=1 - [CRIP2_HUMAN]	1.7603e-05	6.41502e-06	CRIP2		PFKP		More expressed (or upregulated) in HLE cells (i.e. in comparison to HUH7 cells).
P50416	5	5	183.37	72.7032	HLE	Huh7	Carnitine O-palmitoyltransferase 1, liver isoform OS=Homo sapiens GN=CPT1A PE=1 SV=2 - [CPT1A_HUMAN]	2.31313e-11	8.81591e-13	CPT1A		BLVRA
P13987	3	3	241.22	67.3519	HLE	Huh7	CD59 glycoprotein OS=Homo sapiens GN=CD59 PE=1 SV=1 - [CD59_HUMAN]	8.8777e-13	1.25673e-14	CD59		FN3KRP
Q8N556	2	2	144.1	65.5992	HLE	Huh7	Actin filament-associated protein 1 OS=Homo sapiens GN=AFAP1 PE=1 SV=2 - [AFAP1_HUMAN]	7.3103e-08	1.40103e-08	AFAP1		TK1		For a full list of consistently altered metabolic targets in human HCC, including details of how the genes were selected,
Q08380	7	7	542.8	57.6783	HLE	Huh7	Galectin-3-binding protein OS=Homo sapiens GN=LGALS3BP PE=1 SV=1 - [LG3BP_HUMAN]	2.2368e-14	1.21786e-16	LGALS3BP		ACAT1		Nwosu et al 2017 CMGH. Table S1.		https://www.ncbi.nlm.nih.gov/pubmed/28840186
P06703	2	2	235.57	43.759	HLE	Huh7	Protein S100-A6 OS=Homo sapiens GN=S100A6 PE=1 SV=1 - [S10A6_HUMAN]	4.03778e-11	1.7734e-12	S100A6		HMGCL
P00813	2	2	64.18	41.8651	HLE	Huh7	Adenosine deaminase OS=Homo sapiens GN=ADA PE=1 SV=3 - [ADA_HUMAN]	1.75726e-09	1.79585e-10	ADA		HEXB
Q9Y2J8	17	17	1198.34	35.2191	HLE	Huh7	Protein-arginine deiminase type-2 OS=Homo sapiens GN=PADI2 PE=1 SV=2 - [PADI2_HUMAN]	1.40439e-16	2.03904e-19	PADI2		SLC4A7
P16070	5	5	479.82	28.9301	HLE	Huh7	CD44 antigen OS=Homo sapiens GN=CD44 PE=1 SV=3 - [CD44_HUMAN]	3.67723e-13	4.13772e-15	CD44		ATP6V0A1
O43854	3	3	217.79	26.5165	HLE	Huh7	EGF-like repeat and discoidin I-like domain-containing protein 3 OS=Homo sapiens GN=EDIL3 PE=1 SV=1 - [EDIL3_HUMAN]	2.6494e-12	6.03812e-14	EDIL3		GLS
Q9P273	2	2	77.35	25.8846	HLE	Huh7	Teneurin-3 OS=Homo sapiens GN=ODZ3 PE=2 SV=3 - [TEN3_HUMAN]	1.62776e-07	3.5273e-08	ODZ3	TENM3	NNMT
P21926	2	2	219.68	20.4558	HLE	Huh7	CD9 antigen OS=Homo sapiens GN=CD9 PE=1 SV=4 - [CD9_HUMAN]	1.00838e-10	5.5635e-12	CD9		BCAT2
P07195	9	9	579.03	18.2491	HLE	Huh7	L-lactate dehydrogenase B chain OS=Homo sapiens GN=LDHB PE=1 SV=2 - [LDHB_HUMAN]	3.23918e-13	3.52724e-15	LDHB		SMS
Q96N66	2	2	103.65	17.9947	HLE	Huh7	Lysophospholipid acyltransferase 7 OS=Homo sapiens GN=MBOAT7 PE=1 SV=2 - [MBOA7_HUMAN]	2.76049e-12	6.51294e-14	MBOAT7		SPTLC1
P54756	3	2	164.66	17.2661	HLE	Huh7	Ephrin type-A receptor 5 OS=Homo sapiens GN=EPHA5 PE=1 SV=3 - [EPHA5_HUMAN]	2.27375e-09	2.43468e-10	EPHA5		GNPDA1
Q02952	7	7	401.48	16.1451	HLE	Huh7	A-kinase anchor protein 12 OS=Homo sapiens GN=AKAP12 PE=1 SV=4 - [AKA12_HUMAN]	6.56045e-12	1.78597e-13	AKAP12		LTA4H
Q6NZI2	12	12	958.69	15.78	HLE	Huh7	Polymerase I and transcript release factor OS=Homo sapiens GN=PTRF PE=1 SV=1 - [PTRF_HUMAN]	1.89853e-12	3.79017e-14	PTRF		UQCRH
P09382	10	10	839.11	15.4436	HLE	Huh7	Galectin-1 OS=Homo sapiens GN=LGALS1 PE=1 SV=2 - [LEG1_HUMAN]	1.7032e-14	7.43761e-17	LGALS1		SLC25A3
Q01813	14	13	780.46	15.089	HLE	Huh7	6-phosphofructokinase type C OS=Homo sapiens GN=PFKP PE=1 SV=2 - [K6PP_HUMAN]	1.14736e-11	3.41501e-13	PFKP		GNS
Q86SF2	6	5	234.13	14.956	HLE	Huh7	N-acetylgalactosaminyltransferase 7 OS=Homo sapiens GN=GALNT7 PE=1 SV=1 - [GALT7_HUMAN]	4.99986e-11	2.35928e-12	GALNT7		PIGT
Q9BVG4	3	3	154.69	14.5879	HLE	Huh7	UPF0368 protein Cxorf26 OS=Homo sapiens GN=CXorf26 PE=1 SV=1 - [CX026_HUMAN]	4.90621e-10	3.72195e-11	CXorf26		VDAC1
P30530	2	2	76.16	14.5522	HLE	Huh7	Tyrosine-protein kinase receptor UFO OS=Homo sapiens GN=AXL PE=1 SV=3 - [UFO_HUMAN]	2.2204e-11	8.30133e-13	AXL		SUCLG2
Q14699	2	2	99.83	14.0452	HLE	Huh7	Raftlin OS=Homo sapiens GN=RFTN1 PE=1 SV=4 - [RFTN1_HUMAN]	2.77871e-10	1.81549e-11	RFTN1		UQCRB
P26006	4	4	291.35	13.9079	HLE	Huh7	Integrin alpha-3 OS=Homo sapiens GN=ITGA3 PE=1 SV=5 - [ITA3_HUMAN]	5.191e-13	6.59474e-15	ITGA3		CYC1
P26038	23	14	1504.64	13.7511	HLE	Huh7	Moesin OS=Homo sapiens GN=MSN PE=1 SV=3 - [MOES_HUMAN]	7.2082e-15	1.56984e-17	MSN		ACOT7
Q16270	3	3	139.69	13.5753	HLE	Huh7	Insulin-like growth factor-binding protein 7 OS=Homo sapiens GN=IGFBP7 PE=1 SV=1 - [IBP7_HUMAN]	1.75127e-11	6.10242e-13	IGFBP7		NAT10
O95425	5	5	248.45	13.203	HLE	Huh7	Supervillin OS=Homo sapiens GN=SVIL PE=1 SV=2 - [SVIL_HUMAN]	3.13813e-09	3.63362e-10	SVIL		PYGB
P17655	12	12	808.41	13.1257	HLE	Huh7	Calpain-2 catalytic subunit OS=Homo sapiens GN=CAPN2 PE=1 SV=6 - [CAN2_HUMAN]	1.20092e-13	9.58996e-16	CAPN2		COMT
P09493	8	4	691.62	12.4303	HLE	Huh7	Tropomyosin alpha-1 chain OS=Homo sapiens GN=TPM1 PE=1 SV=2 - [TPM1_HUMAN]	1.54295e-08	2.39144e-09	TPM1		ACADVL
Q9NZM1	47	47	2999.46	12.4272	HLE	Huh7	Myoferlin OS=Homo sapiens GN=MYOF PE=1 SV=1 - [MYOF_HUMAN]	9.00113e-15	2.28704e-17	MYOF		TKT
O60437	18	18	1001.11	12.1646	HLE	Huh7	Periplakin OS=Homo sapiens GN=PPL PE=1 SV=4 - [PEPL_HUMAN]	7.74086e-14	5.90047e-16	PPL		CS
P08670	43	42	4190.56	12.0914	HLE	Huh7	Vimentin OS=Homo sapiens GN=VIM PE=1 SV=4 - [VIME_HUMAN]	8.15428e-13	1.12473e-14	VIM		SOD1
Q9NZN4	9	8	361.72	12.0529	HLE	Huh7	EH domain-containing protein 2 OS=Homo sapiens GN=EHD2 PE=1 SV=2 - [EHD2_HUMAN]	7.0617e-14	5.12646e-16	EHD2		NPC1
Q6YHK3	6	6	317.09	11.96	HLE	Huh7	CD109 antigen OS=Homo sapiens GN=CD109 PE=1 SV=2 - [CD109_HUMAN]	1.21384e-07	2.52402e-08	CD109		VDAC3
Q14764	21	21	1271.06	11.5696	HLE	Huh7	Major vault protein OS=Homo sapiens GN=MVP PE=1 SV=4 - [MVP_HUMAN]	2.35735e-13	2.31028e-15	MVP		SDHA
Q14116	2	2	87.59	11.4628	HLE	Huh7	Interleukin-18 OS=Homo sapiens GN=IL18 PE=1 SV=1 - [IL18_HUMAN]	2.63978e-12	5.84489e-14	IL18		ADK
P29323	3	3	194.76	11.2572	HLE	Huh7	Ephrin type-B receptor 2 OS=Homo sapiens GN=EPHB2 PE=1 SV=5 - [EPHB2_HUMAN]	1.22326e-09	1.14999e-10	EPHB2		CAD
P84095	2	2	44.62	11.1929	HLE	Huh7	Rho-related GTP-binding protein RhoG OS=Homo sapiens GN=RHOG PE=1 SV=1 - [RHOG_HUMAN]	1.44007e-09	1.41655e-10	RHOG		PGK1
P30043	2	2	76.88	11.1389	HLE	Huh7	Flavin reductase (NADPH) OS=Homo sapiens GN=BLVRB PE=1 SV=3 - [BLVRB_HUMAN]	7.90057e-11	4.18687e-12	BLVRB		ENO1
Q13509	28	4	2370.52	10.8028	HLE	Huh7	Tubulin beta-3 chain OS=Homo sapiens GN=TUBB3 PE=1 SV=2 - [TBB3_HUMAN]	7.11841e-13	9.30173e-15	TUBB3		GOT2
P09486	3	3	89.15	10.6933	HLE	Huh7	SPARC OS=Homo sapiens GN=SPARC PE=1 SV=1 - [SPRC_HUMAN]	1.60214e-10	9.4791e-12	SPARC		G6PD
P11908	9	2	580.42	10.4363	HLE	Huh7	Ribose-phosphate pyrophosphokinase 2 OS=Homo sapiens GN=PRPS2 PE=1 SV=2 - [PRPS2_HUMAN]	4.02138e-09	4.88989e-10	PRPS2		PCYOX1
Q9UI42	3	3	136.55	10.2018	HLE	Huh7	Carboxypeptidase A4 OS=Homo sapiens GN=CPA4 PE=1 SV=2 - [CBPA4_HUMAN]	2.62825e-05	1.00551e-05	CPA4		ATP5J2
Q86UU1	2	2	83.44	10.1497	HLE	Huh7	Pleckstrin homology-like domain family B member 1 OS=Homo sapiens GN=PHLDB1 PE=1 SV=1 - [PHLB1_HUMAN]	8.3006e-09	1.166e-09	PHLDB1		COX6B1
P04083	16	16	1177	9.31977	HLE	Huh7	Annexin A1 OS=Homo sapiens GN=ANXA1 PE=1 SV=2 - [ANXA1_HUMAN]	1.7032e-14	6.19062e-17	ANXA1		SFXN1
Q96RT1	4	4	153.89	9.1966	HLE	Huh7	Protein LAP2 OS=Homo sapiens GN=ERBB2IP PE=1 SV=2 - [LAP2_HUMAN]	4.18778e-11	1.90008e-12	ERBB2IP		IMPAD1
Q9BWM7	4	2	210.95	8.68237	HLE	Huh7	Sideroflexin-3 OS=Homo sapiens GN=SFXN3 PE=2 SV=2 - [SFXN3_HUMAN]	6.3623e-12	1.68584e-13	SFXN3		ACADM
P09936	7	7	565.08	8.59665	HLE	Huh7	Ubiquitin carboxyl-terminal hydrolase isozyme L1 OS=Homo sapiens GN=UCHL1 PE=1 SV=2 - [UCHL1_HUMAN]	2.04336e-11	7.34276e-13	UCHL1		MTHFD1
Q9NX40	2	2	151.69	8.56799	HLE	Huh7	OCIA domain-containing protein 1 OS=Homo sapiens GN=OCIAD1 PE=1 SV=1 - [OCAD1_HUMAN]	1.71245e-09	1.72799e-10	OCIAD1		NDUFA8
Q9GZX9	2	2	67.2	8.54414	HLE	Huh7	Twisted gastrulation protein homolog 1 OS=Homo sapiens GN=TWSG1 PE=2 SV=1 - [TWSG1_HUMAN]	1.82193e-10	1.1044e-11	TWSG1		IMPDH2
Q56VL3	2	2	129.12	8.51587	HLE	Huh7	OCIA domain-containing protein 2 OS=Homo sapiens GN=OCIAD2 PE=1 SV=1 - [OCAD2_HUMAN]	3.03913e-10	2.04079e-11	OCIAD2		ATP1B3
Q9Y6N5	18	18	1130.72	8.49453	HLE	Huh7	Sulfide:quinone oxidoreductase, mitochondrial OS=Homo sapiens GN=SQRDL PE=1 SV=1 - [SQRD_HUMAN]	3.3628e-14	2.19711e-16	SQRDL		ATP5H
O60934	2	2	94.61	8.40215	HLE	Huh7	Nibrin OS=Homo sapiens GN=NBN PE=1 SV=1 - [NBN_HUMAN]	1.00277e-10	5.45784e-12	NBN		ATP1A1
P05121	4	4	240.24	8.33139	HLE	Huh7	Plasminogen activator inhibitor 1 OS=Homo sapiens GN=SERPINE1 PE=1 SV=1 - [PAI1_HUMAN]	2.73583e-10	1.76762e-11	SERPINE1		ALDH7A1
P22570	4	4	243.28	8.23062	HLE	Huh7	NADPH:adrenodoxin oxidoreductase, mitochondrial OS=Homo sapiens GN=FDXR PE=1 SV=3 - [ADRO_HUMAN]	2.42349e-11	9.50041e-13	FDXR		DDOST
Q92599	3	2	154.33	8.19652	HLE	Huh7	Septin-8 OS=Homo sapiens GN=SEPT8 PE=1 SV=4 - [SEPT8_HUMAN]	4.14444e-09	5.06961e-10	SEPT8		ME2
Q15121	2	2	110.9	7.61706	HLE	Huh7	Astrocytic phosphoprotein PEA-15 OS=Homo sapiens GN=PEA15 PE=1 SV=2 - [PEA15_HUMAN]	1.08367e-08	1.57369e-09	A15		GMPS
Q9UNN8	3	3	209.93	7.60814	HLE	Huh7	Endothelial protein C receptor OS=Homo sapiens GN=PROCR PE=1 SV=1 - [EPCR_HUMAN]	6.74116e-09	9.14111e-10	PROCR
Q9UNF1	9	9	334.72	7.53805	HLE	Huh7	Melanoma-associated antigen D2 OS=Homo sapiens GN=MAGED2 PE=1 SV=2 - [MAGD2_HUMAN]	2.56771e-14	1.49123e-16	MAGED2
O75027	2	2	107.58	7.51022	HLE	Huh7	ATP-binding cassette sub-family B member 7, mitochondrial OS=Homo sapiens GN=ABCB7 PE=1 SV=2 - [ABCB7_HUMAN]	1.86875e-09	1.96711e-10	ABCB7
P24821	6	6	231.9	7.40014	HLE	Huh7	Tenascin OS=Homo sapiens GN=TNC PE=1 SV=3 - [TENA_HUMAN]	3.32283e-09	3.91985e-10	TNC
P32970	2	2	138.18	7.35852	HLE	Huh7	CD70 antigen OS=Homo sapiens GN=CD70 PE=1 SV=2 - [CD70_HUMAN]	2.2385e-11	8.45024e-13	CD70
Q12923	3	3	118.75	7.15702	HLE	Huh7	Tyrosine-protein phosphatase non-receptor type 13 OS=Homo sapiens GN=PTPN13 PE=1 SV=2 - [PTN13_HUMAN]	2.96281e-09	3.3661e-10	PTPN13
P39060	7	7	539.55	6.9368	HLE	Huh7	Collagen alpha-1(XVIII) chain OS=Homo sapiens GN=COL18A1 PE=1 SV=5 - [COIA1_HUMAN]	1.44321e-11	4.87182e-13	COL18A1
Q9UPN3	27	25	1334.57	6.8649	HLE	Huh7	Microtubule-actin cross-linking factor 1, isoforms 1/2/3/5 OS=Homo sapiens GN=MACF1 PE=1 SV=4 - [MACF1_HUMAN]	1.68393e-13	1.58248e-15	MACF1
Q14195	4	2	318.34	6.84504	HLE	Huh7	Dihydropyrimidinase-related protein 3 OS=Homo sapiens GN=DPYSL3 PE=1 SV=1 - [DPYL3_HUMAN]	2.03307e-08	3.31342e-09	DPYSL3
P30519	2	2	87.25	6.72233	HLE	Huh7	Heme oxygenase 2 OS=Homo sapiens GN=HMOX2 PE=1 SV=2 - [HMOX2_HUMAN]	1.57824e-06	4.47406e-07	HMOX2
P07602	19	19	1377.02	6.72088	HLE	Huh7	Proactivator polypeptide OS=Homo sapiens GN=PSAP PE=1 SV=2 - [SAP_HUMAN]	4.45491e-13	5.33619e-15	PSAP
Q3KQU3	2	2	74.07	6.65532	HLE	Huh7	MAP7 domain-containing protein 1 OS=Homo sapiens GN=MAP7D1 PE=1 SV=1 - [MA7D1_HUMAN]	1.16536e-11	3.60387e-13	MAP7D1
P53004	2	2	69.34	6.60447	HLE	Huh7	Biliverdin reductase A OS=Homo sapiens GN=BLVRA PE=1 SV=2 - [BIEA_HUMAN]	1.44007e-09	1.41532e-10	BLVRA
P46821	9	9	362.77	6.58582	HLE	Huh7	Microtubule-associated protein 1B OS=Homo sapiens GN=MAP1B PE=1 SV=2 - [MAP1B_HUMAN]	1.73048e-12	3.32906e-14	MAP1B
Q8WXH0	6	6	228.48	6.54833	HLE	Huh7	Nesprin-2 OS=Homo sapiens GN=SYNE2 PE=1 SV=3 - [SYNE2_HUMAN]	1.35608e-12	2.36541e-14	SYNE2
Q14315	48	43	3066.14	6.42276	HLE	Huh7	Filamin-C OS=Homo sapiens GN=FLNC PE=1 SV=3 - [FLNC_HUMAN]	1.35608e-12	2.45485e-14	FLNC
Q9HA64	3	3	157.73	6.34125	HLE	Huh7	Ketosamine-3-kinase OS=Homo sapiens GN=FN3KRP PE=1 SV=2 - [KT3K_HUMAN]	4.18205e-11	1.8823e-12	FN3KRP
P10301	4	3	293.39	6.27314	HLE	Huh7	Ras-related protein R-Ras OS=Homo sapiens GN=RRAS PE=1 SV=1 - [RRAS_HUMAN]	6.14114e-11	3.07614e-12	RRAS
P02545	31	30	2876.99	6.20935	HLE	Huh7	Prelamin-A/C OS=Homo sapiens GN=LMNA PE=1 SV=1 - [LMNA_HUMAN]	4.17902e-11	1.8506e-12	LMNA
P10646	2	2	73.5	6.03572	HLE	Huh7	Tissue factor pathway inhibitor OS=Homo sapiens GN=TFPI PE=1 SV=1 - [TFPI1_HUMAN]	5.09152e-10	3.91798e-11	TFPI
Q96TA1	6	6	239.34	5.99964	HLE	Huh7	Niban-like protein 1 OS=Homo sapiens GN=FAM129B PE=1 SV=3 - [NIBL1_HUMAN]	1.68393e-13	1.58919e-15	FAM129B
Q63HN8	3	3	177.13	5.82626	HLE	Huh7	E3 ubiquitin-protein ligase RNF213 OS=Homo sapiens GN=RNF213 PE=1 SV=3 - [RN213_HUMAN]	1.77327e-05	6.46874e-06	RNF213
Q7Z4H8	7	7	315.36	5.72188	HLE	Huh7	KDEL motif-containing protein 2 OS=Homo sapiens GN=KDELC2 PE=1 SV=2 - [KDEL2_HUMAN]	1.18068e-11	3.77133e-13	KDELC2
Q8IUD2	3	2	171.09	5.71915	HLE	Huh7	ELKS/Rab6-interacting/CAST family member 1 OS=Homo sapiens GN=ERC1 PE=1 SV=1 - [RB6I2_HUMAN]	3.10988e-09	3.58962e-10	ERC1
P04183	4	4	170.22	5.69985	HLE	Huh7	Thymidine kinase, cytosolic OS=Homo sapiens GN=TK1 PE=1 SV=2 - [KITH_HUMAN]	6.74116e-09	9.15133e-10	TK1
P04899	13	8	803.78	5.60064	HLE	Huh7	Guanine nucleotide-binding protein G(i) subunit alpha-2 OS=Homo sapiens GN=GNAI2 PE=1 SV=3 - [GNAI2_HUMAN]	2.33642e-09	2.52724e-10	GNAI2
P07858	8	8	803.73	5.59996	HLE	Huh7	Cathepsin B OS=Homo sapiens GN=CTSB PE=1 SV=3 - [CATB_HUMAN]	5.54168e-11	2.6753e-12	CTSB
Q8NBJ7	4	4	250.05	5.33727	HLE	Huh7	Sulfatase-modifying factor 2 OS=Homo sapiens GN=SUMF2 PE=1 SV=2 - [SUMF2_HUMAN]	8.10673e-11	4.32555e-12	SUMF2
Q9BZQ8	2	2	98.69	5.32625	HLE	Huh7	Protein Niban OS=Homo sapiens GN=FAM129A PE=1 SV=1 - [NIBAN_HUMAN]	2.23821e-10	1.38924e-11	FAM129A
O75915	2	2	171.85	5.28204	HLE	Huh7	PRA1 family protein 3 OS=Homo sapiens GN=ARL6IP5 PE=1 SV=1 - [PRAF3_HUMAN]	2.87853e-10	1.90161e-11	ARL6IP5
Q15149	103	103	6652.64	5.17452	HLE	Huh7	Plectin OS=Homo sapiens GN=PLEC PE=1 SV=3 - [PLEC_HUMAN]	3.09932e-13	3.26244e-15	PLEC
Q93062	4	4	142.23	4.99528	HLE	Huh7	RNA-binding protein with multiple splicing OS=Homo sapiens GN=RBPMS PE=1 SV=1 - [RBPMS_HUMAN]	2.04742e-07	4.59193e-08	RBPMS
Q8TF42	5	5	293.29	4.95348	HLE	Huh7	Ubiquitin-associated and SH3 domain-containing protein B OS=Homo sapiens GN=UBASH3B PE=1 SV=2 - [UBS3B_HUMAN]	2.20149e-11	8.15069e-13	UBASH3B
Q8IVF2	17	17	842.12	4.94396	HLE	Huh7	Protein AHNAK2 OS=Homo sapiens GN=AHNAK2 PE=1 SV=2 - [AHNK2_HUMAN]	2.07695e-12	4.29715e-14	AHNAK2
Q9BTW9	3	3	105.14	4.90089	HLE	Huh7	Tubulin-specific chaperone D OS=Homo sapiens GN=TBCD PE=1 SV=2 - [TBCD_HUMAN]	3.07957e-09	3.52111e-10	TBCD
Q96P44	2	2	115.76	4.89689	HLE	Huh7	Collagen alpha-1(XXI) chain OS=Homo sapiens GN=COL21A1 PE=2 SV=1 - [COLA1_HUMAN]	5.72662e-06	1.86869e-06	COL21A1
P19367	3	2	122.69	4.8616	HLE	Huh7	Hexokinase-1 OS=Homo sapiens GN=HK1 PE=1 SV=3 - [HXK1_HUMAN]	9.75036e-08	1.96069e-08	HK1
P52815	6	6	315.77	4.85111	HLE	Huh7	39S ribosomal protein L12, mitochondrial OS=Homo sapiens GN=MRPL12 PE=1 SV=2 - [RM12_HUMAN]	4.1197e-09	5.02439e-10	MRPL12
Q9UHY1	3	3	122.84	4.77977	HLE	Huh7	Nuclear receptor-binding protein OS=Homo sapiens GN=NRBP1 PE=1 SV=1 - [NRBP_HUMAN]	3.15247e-10	2.18556e-11	NRBP1
Q9Y570	3	3	191.26	4.74454	HLE	Huh7	Protein phosphatase methylesterase 1 OS=Homo sapiens GN=PPME1 PE=1 SV=3 - [PPME1_HUMAN]	1.27181e-11	4.10858e-13	PPME1
Q8IVL5	2	2	160.92	4.58527	HLE	Huh7	Prolyl 3-hydroxylase 2 OS=Homo sapiens GN=LEPREL1 PE=1 SV=1 - [P3H2_HUMAN]	1.63947e-06	4.68334e-07	LEPREL1
P24752	13	13	762.56	4.52877	HLE	Huh7	Acetyl-CoA acetyltransferase, mitochondrial OS=Homo sapiens GN=ACAT1 PE=1 SV=1 - [THIL_HUMAN]	2.10811e-11	7.65194e-13	ACAT1
Q9UIQ6	7	6	394.41	4.47773	HLE	Huh7	Leucyl-cystinyl aminopeptidase OS=Homo sapiens GN=LNPEP PE=1 SV=3 - [LCAP_HUMAN]	4.39774e-09	5.4433e-10	LNP
Q8IY17	2	2	86.49	4.4301	HLE	Huh7	Neuropathy target esterase OS=Homo sapiens GN=PNPLA6 PE=1 SV=2 - [PLPL6_HUMAN]	1.33811e-07	2.82678e-08	PNPLA6
P35914	2	2	69.87	4.38118	HLE	Huh7	Hydroxymethylglutaryl-CoA lyase, mitochondrial OS=Homo sapiens GN=HMGCL PE=1 SV=2 - [HMGCL_HUMAN]	9.13981e-08	1.81801e-08	HMGCL
Q8WW33	2	2	126.96	4.36494	HLE	Huh7	Gametocyte-specific factor 1 OS=Homo sapiens GN=GTSF1 PE=1 SV=2 - [GTSF1_HUMAN]	3.52983e-07	8.36654e-08	GTSF1
P21333	71	67	5252.07	4.29862	HLE	Huh7	Filamin-A OS=Homo sapiens GN=FLNA PE=1 SV=4 - [FLNA_HUMAN]	3.95445e-11	1.69405e-12	FLNA
O94901	2	2	58.99	4.28961	HLE	Huh7	SUN domain-containing protein 1 OS=Homo sapiens GN=SUN1 PE=1 SV=3 - [SUN1_HUMAN]	1.77082e-07	3.89516e-08	SUN1
P05067	2	2	79.23	4.27596	HLE	Huh7	Amyloid beta A4 protein OS=Homo sapiens GN=APP PE=1 SV=3 - [A4_HUMAN]	1.19024e-09	1.11031e-10	APP
P04632	3	3	109.56	4.19742	HLE	Huh7	Calpain small subunit 1 OS=Homo sapiens GN=CAPNS1 PE=1 SV=1 - [CPNS1_HUMAN]	1.16536e-11	3.57437e-13	CAPNS1
P07686	11	11	733.33	4.18638	HLE	Huh7	Beta-hexosaminidase subunit beta OS=Homo sapiens GN=HEXB PE=1 SV=3 - [HEXB_HUMAN]	2.6589e-11	1.06163e-12	HEXB
Q8TAQ2	5	4	203.07	4.15946	HLE	Huh7	SWI/SNF complex subunit SMARCC2 OS=Homo sapiens GN=SMARCC2 PE=1 SV=1 - [SMRC2_HUMAN]	2.20149e-11	8.0842e-13	SMARCC2
Q9Y6M7	5	5	317.8	4.13619	HLE	Huh7	Sodium bicarbonate cotransporter 3 OS=Homo sapiens GN=SLC4A7 PE=1 SV=2 - [S4A7_HUMAN]	9.0335e-08	1.78375e-08	SLC4A7
P07355	27	27	2620.42	4.03972	HLE	Huh7	Annexin A2 OS=Homo sapiens GN=ANXA2 PE=1 SV=2 - [ANXA2_HUMAN]	2.07976e-09	2.20432e-10	ANXA2
O00159	18	18	953.09	4.02993	HLE	Huh7	Unconventional myosin-Ic OS=Homo sapiens GN=MYO1C PE=1 SV=4 - [MYO1C_HUMAN]	5.35719e-11	2.56678e-12	MYO1C
Q9NQC3	6	6	480.09	3.98058	HLE	Huh7	Reticulon-4 OS=Homo sapiens GN=RTN4 PE=1 SV=2 - [RTN4_HUMAN]	1.06376e-09	9.69163e-11	RTN4
Q02818	3	3	148.73	3.97071	HLE	Huh7	Nucleobindin-1 OS=Homo sapiens GN=NUCB1 PE=1 SV=4 - [NUCB1_HUMAN]	1.77091e-09	1.83197e-10	NUCB1
Q96FZ7	2	2	137.6	3.93132	HLE	Huh7	Charged multivesicular body protein 6 OS=Homo sapiens GN=CHMP6 PE=1 SV=3 - [CHMP6_HUMAN]	1.00838e-10	5.56278e-12	CHMP6
Q03001	4	3	132.84	3.91192	HLE	Huh7	Dystonin OS=Homo sapiens GN=DST PE=1 SV=4 - [DYST_HUMAN]	4.4198e-10	3.27274e-11	DST
Q9H1B7	2	2	109.23	3.88505	HLE	Huh7	Interferon regulatory factor 2-binding protein-like OS=Homo sapiens GN=IRF2BPL PE=1 SV=1 - [I2BPL_HUMAN]	1.08816e-07	2.23557e-08	IRF2BPL
Q14651	5	3	248.31	3.80918	HLE	Huh7	Plastin-1 OS=Homo sapiens GN=PLS1 PE=1 SV=2 - [PLSI_HUMAN]	9.07143e-10	8.03423e-11	PLS1
Q9NZ08	14	14	610.49	3.79986	HLE	Huh7	Endoplasmic reticulum aminopeptidase 1 OS=Homo sapiens GN=ERAP1 PE=1 SV=3 - [ERAP1_HUMAN]	3.94666e-10	2.80779e-11	ERAP1
P60903	3	3	187.82	3.78517	HLE	Huh7	Protein S100-A10 OS=Homo sapiens GN=S100A10 PE=1 SV=2 - [S10AA_HUMAN]	1.74939e-06	5.05449e-07	S100A10
P05556	15	15	1121.9	3.7574	HLE	Huh7	Integrin beta-1 OS=Homo sapiens GN=ITGB1 PE=1 SV=2 - [ITB1_HUMAN]	4.70562e-10	3.53562e-11	ITGB1
Q9BT09	3	3	198.57	3.73427	HLE	Huh7	Protein canopy homolog 3 OS=Homo sapiens GN=CNPY3 PE=1 SV=1 - [CNPY3_HUMAN]	1.00277e-10	5.45973e-12	CNPY3
O94973	9	5	425.88	3.69267	HLE	Huh7	AP-2 complex subunit alpha-2 OS=Homo sapiens GN=AP2A2 PE=1 SV=2 - [AP2A2_HUMAN]	6.08997e-09	8.1347e-10	AP2A2
Q9UBX3	4	4	279.15	3.67867	HLE	Huh7	Mitochondrial dicarboxylate carrier OS=Homo sapiens GN=SLC25A10 PE=1 SV=2 - [DIC_HUMAN]	1.27417e-09	1.21636e-10	SLC25A10
Q9BQ39	3	2	165.57	3.66776	HLE	Huh7	ATP-dependent RNA helicase DDX50 OS=Homo sapiens GN=DDX50 PE=1 SV=1 - [DDX50_HUMAN]	1.70265e-07	3.70812e-08	DDX50
O75531	5	5	243.51	3.62738	HLE	Huh7	Barrier-to-autointegration factor OS=Homo sapiens GN=BANF1 PE=1 SV=1 - [BAF_HUMAN]	1.11909e-11	3.29023e-13	BANF1
P36404	3	3	166.38	3.62445	HLE	Huh7	ADP-ribosylation factor-like protein 2 OS=Homo sapiens GN=ARL2 PE=1 SV=4 - [ARL2_HUMAN]	8.21101e-10	7.06356e-11	ARL2
P18206	32	31	2093	3.59839	HLE	Huh7	Vinculin OS=Homo sapiens GN=VCL PE=1 SV=4 - [VINC_HUMAN]	2.36019e-11	9.16662e-13	VCL
P51809	2	2	95.81	3.59098	HLE	Huh7	Vesicle-associated membrane protein 7 OS=Homo sapiens GN=VAMP7 PE=1 SV=3 - [VAMP7_HUMAN]	1.39546e-09	1.34734e-10	VAMP7
P29317	6	5	340.99	3.58532	HLE	Huh7	Ephrin type-A receptor 2 OS=Homo sapiens GN=EPHA2 PE=1 SV=2 - [EPHA2_HUMAN]	1.01311e-07	2.05565e-08	EPHA2
Q09666	149	148	10511.6	3.52613	HLE	Huh7	Neuroblast differentiation-associated protein AHNAK OS=Homo sapiens GN=AHNAK PE=1 SV=2 - [AHNK_HUMAN]	4.83266e-11	2.2453e-12	AHNAK
Q6UW68	2	2	92.68	3.50729	HLE	Huh7	Transmembrane protein 205 OS=Homo sapiens GN=TMEM205 PE=1 SV=1 - [TM205_HUMAN]	1.00028e-09	9.00434e-11	TMEM205
P37802	7	7	636.88	3.50238	HLE	Huh7	Transgelin-2 OS=Homo sapiens GN=TAGLN2 PE=1 SV=3 - [TAGL2_HUMAN]	1.89337e-10	1.15458e-11	TAGLN2
Q5SSJ5	4	4	315.5	3.49672	HLE	Huh7	Heterochromatin protein 1-binding protein 3 OS=Homo sapiens GN=HP1BP3 PE=1 SV=1 - [HP1B3_HUMAN]	1.2522e-09	1.19084e-10	HP1BP3
P19320	2	2	76.71	3.49388	HLE	Huh7	Vascular cell adhesion protein 1 OS=Homo sapiens GN=VCAM1 PE=1 SV=1 - [VCAM1_HUMAN]	9.22867e-08	1.83903e-08	VCAM1
P06756	16	16	880.06	3.46178	HLE	Huh7	Integrin alpha-V OS=Homo sapiens GN=ITGAV PE=1 SV=2 - [ITAV_HUMAN]	3.55028e-09	4.22683e-10	ITGAV
P50995	5	5	196.98	3.45634	HLE	Huh7	Annexin A11 OS=Homo sapiens GN=ANXA11 PE=1 SV=1 - [ANX11_HUMAN]	4.35274e-07	1.06962e-07	ANXA11
Q12846	2	2	48.57	3.43904	HLE	Huh7	Syntaxin-4 OS=Homo sapiens GN=STX4 PE=1 SV=2 - [STX4_HUMAN]	3.96329e-07	9.59533e-08	STX4
Q96T23	3	3	101.11	3.43468	HLE	Huh7	Remodeling and spacing factor 1 OS=Homo sapiens GN=RSF1 PE=1 SV=2 - [RSF1_HUMAN]	7.50583e-10	6.35222e-11	RSF1
P20645	2	2	327.08	3.43243	HLE	Huh7	Cation-dependent mannose-6-phosphate receptor OS=Homo sapiens GN=M6PR PE=1 SV=1 - [MPRD_HUMAN]	1.0827e-09	9.90344e-11	M6PR
Q12888	8	8	478.42	3.42596	HLE	Huh7	Tumor suppressor p53-binding protein 1 OS=Homo sapiens GN=TP53BP1 PE=1 SV=2 - [TP53B_HUMAN]	4.18169e-12	1.03214e-13	TP53BP1
P31150	11	5	895.32	3.4252	HLE	Huh7	Rab GDP dissociation inhibitor alpha OS=Homo sapiens GN=GDI1 PE=1 SV=2 - [GDIA_HUMAN]	5.51583e-12	1.40148e-13	GDI1
P50402	3	3	242.21	3.38412	HLE	Huh7	Emerin OS=Homo sapiens GN=EMD PE=1 SV=1 - [EMD_HUMAN]	9.51859e-07	2.54981e-07	EMD
Q6IBS0	6	6	374.68	3.36371	HLE	Huh7	Twinfilin-2 OS=Homo sapiens GN=TWF2 PE=1 SV=2 - [TWF2_HUMAN]	1.35608e-12	2.32941e-14	TWF2
Q14980	17	16	1021.58	3.31714	HLE	Huh7	Nuclear mitotic apparatus protein 1 OS=Homo sapiens GN=NUMA1 PE=1 SV=2 - [NUMA1_HUMAN]	2.61285e-09	2.9011e-10	NUMA1
P19525	2	2	115.96	3.28695	HLE	Huh7	Interferon-induced, double-stranded RNA-activated protein kinase OS=Homo sapiens GN=EIF2AK2 PE=1 SV=2 - [E2AK2_HUMAN]	4.39774e-09	5.43463e-10	EIF2AK2
P08648	4	4	248.37	3.2746	HLE	Huh7	Integrin alpha-5 OS=Homo sapiens GN=ITGA5 PE=1 SV=2 - [ITA5_HUMAN]	2.35057e-10	1.4931e-11	ITGA5
P60981	4	4	315.09	3.26191	HLE	Huh7	Destrin OS=Homo sapiens GN=DSTN PE=1 SV=3 - [DEST_HUMAN]	5.34607e-10	4.15266e-11	DSTN
Q9C0B1	2	2	175.28	3.25681	HLE	Huh7	Alpha-ketoglutarate-dependent dioxygenase FTO OS=Homo sapiens GN=FTO PE=1 SV=3 - [FTO_HUMAN]	2.33355e-09	2.51566e-10	FTO
Q9C0H2	2	2	97.94	3.2536	HLE	Huh7	Protein tweety homolog 3 OS=Homo sapiens GN=TTYH3 PE=1 SV=3 - [TTYH3_HUMAN]	8.48703e-09	1.19527e-09	TTYH3
Q93050	4	4	193.07	3.2426	HLE	Huh7	V-type proton ATPase 116 kDa subunit a isoform 1 OS=Homo sapiens GN=ATP6V0A1 PE=1 SV=3 - [VPP1_HUMAN]	1.79573e-08	2.87447e-09	ATP6V0A1
O75367	10	8	849.82	3.23365	HLE	Huh7	Core histone macro-H2A.1 OS=Homo sapiens GN=H2AFY PE=1 SV=4 - [H2AY_HUMAN]	6.96223e-08	1.32169e-08	H2AFY
O94925	7	7	449.28	3.22424	HLE	Huh7	Glutaminase kidney isoform, mitochondrial OS=Homo sapiens GN=GLS PE=1 SV=1 - [GLSK_HUMAN]	3.04979e-10	2.05902e-11	GLS
Q92878	8	7	337.94	3.21037	HLE	Huh7	DNA repair protein RAD50 OS=Homo sapiens GN=RAD50 PE=1 SV=1 - [RAD50_HUMAN]	1.25836e-10	7.26242e-12	RAD50
Q15836	3	3	379.67	3.19156	HLE	Huh7	Vesicle-associated membrane protein 3 OS=Homo sapiens GN=VAMP3 PE=1 SV=3 - [VAMP3_HUMAN]	1.08367e-08	1.57732e-09	VAMP3
P60033	2	2	155.02	3.17953	HLE	Huh7	CD81 antigen OS=Homo sapiens GN=CD81 PE=1 SV=1 - [CD81_HUMAN]	4.54257e-09	5.63905e-10	CD81
P42785	5	5	291.53	3.16457	HLE	Huh7	Lysosomal Pro-X carboxypeptidase OS=Homo sapiens GN=PRCP PE=1 SV=1 - [PCP_HUMAN]	4.27438e-10	3.14954e-11	PRCP
Q86VS8	2	2	68.14	3.15679	HLE	Huh7	Protein Hook homolog 3 OS=Homo sapiens GN=HOOK3 PE=1 SV=2 - [HOOK3_HUMAN]	3.78556e-07	9.11007e-08	HOOK3
P40261	3	3	120.19	3.14402	HLE	Huh7	Nicotinamide N-methyltransferase OS=Homo sapiens GN=NNMT PE=1 SV=1 - [NNMT_HUMAN]	3.95624e-10	2.85247e-11	NNMT
P20810	2	2	112.95	3.13985	HLE	Huh7	Calpastatin OS=Homo sapiens GN=CAST PE=1 SV=4 - [ICAL_HUMAN]	8.74112e-07	2.31616e-07	CAST
P18084	4	4	198.35	3.13881	HLE	Huh7	Integrin beta-5 OS=Homo sapiens GN=ITGB5 PE=1 SV=1 - [ITB5_HUMAN]	2.46917e-09	2.68127e-10	ITGB5
P07942	8	8	385.9	3.13155	HLE	Huh7	Laminin subunit beta-1 OS=Homo sapiens GN=LAMB1 PE=1 SV=2 - [LAMB1_HUMAN]	4.9518e-11	2.31863e-12	LAMB1
Q9UNH7	2	2	90.74	3.11661	HLE	Huh7	Sorting nexin-6 OS=Homo sapiens GN=SNX6 PE=1 SV=1 - [SNX6_HUMAN]	3.83919e-08	6.81384e-09	SNX6
Q13443	2	2	50.99	3.10261	HLE	Huh7	Disintegrin and metalloproteinase domain-containing protein 9 OS=Homo sapiens GN=ADAM9 PE=1 SV=1 - [ADAM9_HUMAN]	1.48456e-07	3.19005e-08	ADAM9
Q9HC35	12	12	585.35	3.0823	HLE	Huh7	Echinoderm microtubule-associated protein-like 4 OS=Homo sapiens GN=EML4 PE=1 SV=3 - [EMAL4_HUMAN]	5.24338e-11	2.49322e-12	EML4
Q8TAT6	5	5	228.47	3.05671	HLE	Huh7	Nuclear protein localization protein 4 homolog OS=Homo sapiens GN=NPLOC4 PE=1 SV=3 - [NPL4_HUMAN]	3.589e-11	1.48622e-12	NPLOC4
P40763	2	2	67.13	3.04126	HLE	Huh7	Signal transducer and activator of transcription 3 OS=Homo sapiens GN=STAT3 PE=1 SV=2 - [STAT3_HUMAN]	5.28183e-09	6.82516e-10	STAT3
Q13418	2	2	113.29	3.03046	HLE	Huh7	Integrin-linked protein kinase OS=Homo sapiens GN=ILK PE=1 SV=2 - [ILK_HUMAN]	5.84993e-09	7.75036e-10	ILK
O75718	6	6	315.22	3.00961	HLE	Huh7	Cartilage-associated protein OS=Homo sapiens GN=CRTAP PE=1 SV=1 - [CRTAP_HUMAN]	2.67228e-11	1.07667e-12	CRTAP
P49005	2	2	93.15	3.0073	HLE	Huh7	DNA polymerase delta subunit 2 OS=Homo sapiens GN=POLD2 PE=1 SV=1 - [DPOD2_HUMAN]	1.78992e-08	2.85868e-09	POLD2
Q96QV6	5	2	248.49	3.00449	HLE	Huh7	Histone H2A type 1-A OS=Homo sapiens GN=HIST1H2AA PE=1 SV=3 - [H2A1A_HUMAN]	0.000184732	8.39506e-05	HIST1H2AA
Q9UH62	2	2	67.38	3.00315	HLE	Huh7	Armadillo repeat-containing X-linked protein 3 OS=Homo sapiens GN=ARMCX3 PE=1 SV=1 - [ARMX3_HUMAN]	1.00651e-05	3.47439e-06	ARMCX3
P07711	2	2	144.07	2.99848	HLE	Huh7	Cathepsin L1 OS=Homo sapiens GN=CTSL1 PE=1 SV=2 - [CATL1_HUMAN]	5.36128e-10	4.18394e-11	CTSL1
O15400	4	4	318.18	2.99487	HLE	Huh7	Syntaxin-7 OS=Homo sapiens GN=STX7 PE=1 SV=4 - [STX7_HUMAN]	1.27088e-07	2.65708e-08	STX7
Q96AY3	5	4	359.46	2.98316	HLE	Huh7	Peptidyl-prolyl cis-trans isomerase FKBP10 OS=Homo sapiens GN=FKBP10 PE=1 SV=1 - [FKB10_HUMAN]	2.57131e-08	4.33063e-09	FKBP10
O43813	2	2	108.15	2.94743	HLE	Huh7	LanC-like protein 1 OS=Homo sapiens GN=LANCL1 PE=1 SV=1 - [LANC1_HUMAN]	1.41372e-09	1.37523e-10	LANCL1
Q9UJU6	5	5	309.35	2.92451	HLE	Huh7	Drebrin-like protein OS=Homo sapiens GN=DBNL PE=1 SV=1 - [DBNL_HUMAN]	5.90991e-09	7.87272e-10	DBNL
Q13492	4	4	315.34	2.90997	HLE	Huh7	Phosphatidylinositol-binding clathrin assembly protein OS=Homo sapiens GN=PICALM PE=1 SV=2 - [PICAL_HUMAN]	6.63057e-09	8.92901e-10	PICALM
O15031	5	5	189.52	2.90058	HLE	Huh7	Plexin-B2 OS=Homo sapiens GN=PLXNB2 PE=1 SV=3 - [PLXB2_HUMAN]	1.28063e-08	1.93086e-09	PLXNB2
Q99536	4	4	221.7	2.88965	HLE	Huh7	Synaptic vesicle membrane protein VAT-1 homolog OS=Homo sapiens GN=VAT1 PE=1 SV=2 - [VAT1_HUMAN]	1.00185e-09	9.05482e-11	VAT1
Q9UJ70	2	2	88.9	2.84514	HLE	Huh7	N-acetyl-D-glucosamine kinase OS=Homo sapiens GN=NAGK PE=1 SV=4 - [NAGK_HUMAN]	2.3144e-06	6.8634e-07	NAGK
Q99426	4	4	168.26	2.82968	HLE	Huh7	Tubulin-folding cofactor B OS=Homo sapiens GN=TBCB PE=1 SV=2 - [TBCB_HUMAN]	3.39183e-07	7.99019e-08	TBCB
P54819	9	9	554.62	2.78827	HLE	Huh7	Adenylate kinase 2, mitochondrial OS=Homo sapiens GN=AK2 PE=1 SV=2 - [KAD2_HUMAN]	6.44067e-10	5.23156e-11	AK2
P11047	12	12	692.67	2.78181	HLE	Huh7	Laminin subunit gamma-1 OS=Homo sapiens GN=LAMC1 PE=1 SV=3 - [LAMC1_HUMAN]	2.75343e-09	3.08824e-10	LAMC1
Q29RF7	7	6	441.17	2.7752	HLE	Huh7	Sister chromatid cohesion protein PDS5 homolog A OS=Homo sapiens GN=PDS5A PE=1 SV=1 - [PDS5A_HUMAN]	2.88336e-08	4.93991e-09	PDS5A
Q6PIU2	4	4	217.64	2.74611	HLE	Huh7	Neutral cholesterol ester hydrolase 1 OS=Homo sapiens GN=NCEH1 PE=1 SV=3 - [NCEH1_HUMAN]	1.32971e-09	1.2742e-10	NCEH1
Q6ZXV5	2	2	70.61	2.7267	HLE	Huh7	Transmembrane and TPR repeat-containing protein 3 OS=Homo sapiens GN=TMTC3 PE=1 SV=2 - [TMTC3_HUMAN]	6.51376e-07	1.67395e-07	TMTC3
O00425	15	12	1137.36	2.71995	HLE	Huh7	Insulin-like growth factor 2 mRNA-binding protein 3 OS=Homo sapiens GN=IGF2BP3 PE=1 SV=2 - [IF2B3_HUMAN]	2.80653e-09	3.15798e-10	IGF2BP3
O15382	3	3	167.97	2.68844	HLE	Huh7	Branched-chain-amino-acid aminotransferase, mitochondrial OS=Homo sapiens GN=BCAT2 PE=1 SV=2 - [BCAT2_HUMAN]	1.57579e-08	2.45949e-09	BCAT2
P00533	5	5	197.48	2.68782	HLE	Huh7	Epidermal growth factor receptor OS=Homo sapiens GN=EGFR PE=1 SV=2 - [EGFR_HUMAN]	3.29774e-07	7.73262e-08	EGFR
P27348	11	9	696.8	2.6853	HLE	Huh7	14-3-3 protein theta OS=Homo sapiens GN=YWHAQ PE=1 SV=1 - [1433T_HUMAN]	3.41997e-06	1.05889e-06	YWHAQ
Q14344	3	2	130.51	2.66605	HLE	Huh7	Guanine nucleotide-binding protein subunit alpha-13 OS=Homo sapiens GN=GNA13 PE=1 SV=2 - [GNA13_HUMAN]	9.6105e-07	2.57792e-07	GNA13
O75436	2	2	73.14	2.66512	HLE	Huh7	Vacuolar protein sorting-associated protein 26A OS=Homo sapiens GN=VPS26A PE=1 SV=2 - [VP26A_HUMAN]	1.18807e-09	1.10397e-10	VPS26A
P60891	10	3	595.4	2.66437	HLE	Huh7	Ribose-phosphate pyrophosphokinase 1 OS=Homo sapiens GN=PRPS1 PE=1 SV=2 - [PRPS1_HUMAN]	5.47026e-09	7.12822e-10	PRPS1
Q8WVJ2	3	3	138.4	2.65741	HLE	Huh7	NudC domain-containing protein 2 OS=Homo sapiens GN=NUDCD2 PE=1 SV=1 - [NUDC2_HUMAN]	3.74717e-09	4.48844e-10	NUDCD2
Q9H773	2	2	59.16	2.65599	HLE	Huh7	dCTP pyrophosphatase 1 OS=Homo sapiens GN=DCTPP1 PE=1 SV=1 - [DCTP1_HUMAN]	6.33523e-10	5.10497e-11	DCTPP1
P17252	2	2	135.84	2.64306	HLE	Huh7	Protein kinase C alpha type OS=Homo sapiens GN=PRKCA PE=1 SV=4 - [KPCA_HUMAN]	1.77091e-09	1.82452e-10	PRKCA
P35251	5	5	235.97	2.64251	HLE	Huh7	Replication factor C subunit 1 OS=Homo sapiens GN=RFC1 PE=1 SV=4 - [RFC1_HUMAN]	1.7387e-09	1.7671e-10	RFC1
P63010	11	7	541.26	2.63976	HLE	Huh7	AP-2 complex subunit beta OS=Homo sapiens GN=AP2B1 PE=1 SV=1 - [AP2B1_HUMAN]	6.52164e-10	5.34987e-11	AP2B1
Q9NRN7	4	4	164.79	2.62764	HLE	Huh7	L-aminoadipate-semialdehyde dehydrogenase-phosphopantetheinyl transferase OS=Homo sapiens GN=AASDHPPT PE=1 SV=2 - [ADPPT_HUMAN]	4.3319e-08	7.75182e-09	AASDHPPT
Q92804	3	2	232.85	2.6258	HLE	Huh7	TATA-binding protein-associated factor 2N OS=Homo sapiens GN=TAF15 PE=1 SV=1 - [RBP56_HUMAN]	3.44534e-07	8.15376e-08	TAF15
Q02218	2	2	53.5	2.61573	HLE	Huh7	2-oxoglutarate dehydrogenase, mitochondrial OS=Homo sapiens GN=OGDH PE=1 SV=3 - [ODO1_HUMAN]	1.50657e-06	4.24903e-07	OGDH
P52788	3	3	229.79	2.60066	HLE	Huh7	Spermine synthase OS=Homo sapiens GN=SMS PE=1 SV=2 - [SPSY_HUMAN]	1.6612e-07	3.61184e-08	SMS
O15269	3	3	212.74	2.58033	HLE	Huh7	Serine palmitoyltransferase 1 OS=Homo sapiens GN=SPTLC1 PE=1 SV=1 - [SPTC1_HUMAN]	1.3396e-08	2.05195e-09	SPTLC1
O75477	5	4	235.56	2.56682	HLE	Huh7	Erlin-1 OS=Homo sapiens GN=ERLIN1 PE=1 SV=1 - [ERLN1_HUMAN]	4.88506e-09	6.15287e-10	ERLIN1
Q9HDC9	7	7	440.47	2.5655	HLE	Huh7	Adipocyte plasma membrane-associated protein OS=Homo sapiens GN=APMAP PE=1 SV=2 - [APMAP_HUMAN]	4.34672e-09	5.34859e-10	APMAP
Q14558	6	6	380.76	2.55226	HLE	Huh7	Phosphoribosyl pyrophosphate synthase-associated protein 1 OS=Homo sapiens GN=PRPSAP1 PE=1 SV=2 - [KPRA_HUMAN]	5.26554e-10	4.071e-11	PRPSAP1
Q96CW1	4	4	216.27	2.54144	HLE	Huh7	AP-2 complex subunit mu OS=Homo sapiens GN=AP2M1 PE=1 SV=2 - [AP2M1_HUMAN]	3.06766e-10	2.11563e-11	AP2M1
P60953	2	2	197.92	2.52551	HLE	Huh7	Cell division control protein 42 homolog OS=Homo sapiens GN=CDC42 PE=1 SV=2 - [CDC42_HUMAN]	5.08062e-08	9.44203e-09	CDC42
Q13510	2	2	143.12	2.51577	HLE	Huh7	Acid ceramidase OS=Homo sapiens GN=ASAH1 PE=1 SV=5 - [ASAH1_HUMAN]	2.32198e-08	3.84327e-09	ASAH1
O15173	4	4	223.46	2.51242	HLE	Huh7	Membrane-associated progesterone receptor component 2 OS=Homo sapiens GN=PGRMC2 PE=1 SV=1 - [PGRC2_HUMAN]	1.13624e-09	1.04757e-10	PGRMC2
Q9NPQ8	4	4	162.13	2.51101	HLE	Huh7	Synembryn-A OS=Homo sapiens GN=RIC8A PE=1 SV=3 - [RIC8A_HUMAN]	2.6135e-09	2.91233e-10	RIC8A
P52701	4	4	175.09	2.5085	HLE	Huh7	DNA mismatch repair protein Msh6 OS=Homo sapiens GN=MSH6 PE=1 SV=2 - [MSH6_HUMAN]	8.70899e-10	7.65001e-11	MSH6
P46926	5	4	238.22	2.49507	HLE	Huh7	Glucosamine-6-phosphate isomerase 1 OS=Homo sapiens GN=GNPDA1 PE=1 SV=1 - [GNPI1_HUMAN]	3.15941e-09	3.66973e-10	GNPDA1
Q99797	2	2	59.37	2.47453	HLE	Huh7	Mitochondrial intermediate peptidase OS=Homo sapiens GN=MIPEP PE=1 SV=2 - [MIPEP_HUMAN]	2.88336e-08	4.9331e-09	MIP
P46940	28	26	1596.44	2.46833	HLE	Huh7	Ras GTPase-activating-like protein IQGAP1 OS=Homo sapiens GN=IQGAP1 PE=1 SV=1 - [IQGA1_HUMAN]	6.33523e-10	5.08797e-11	IQGAP1
P42166	19	9	1527.33	2.46579	HLE	Huh7	Lamina-associated polypeptide 2, isoform alpha OS=Homo sapiens GN=TMPO PE=1 SV=2 - [LAP2A_HUMAN]	1.12614e-08	1.66278e-09	TMPO
P09960	10	10	673.87	2.4612	HLE	Huh7	Leukotriene A-4 hydrolase OS=Homo sapiens GN=LTA4H PE=1 SV=2 - [LKHA4_HUMAN]	5.17946e-09	6.58008e-10	LTA4H
Q5XKP0	3	3	100.76	2.45657	HLE	Huh7	Protein QIL1 OS=Homo sapiens GN=QIL1 PE=1 SV=1 - [QIL1_HUMAN]	1.75186e-05	6.37792e-06	QIL1
Q9BU23	2	2	104.28	2.4533	HLE	Huh7	Lipase maturation factor 2 OS=Homo sapiens GN=LMF2 PE=1 SV=2 - [LMF2_HUMAN]	3.60568e-05	1.42133e-05	LMF2
Q15645	2	2	120.49	2.43077	HLE	Huh7	Pachytene checkpoint protein 2 homolog OS=Homo sapiens GN=TRIP13 PE=1 SV=2 - [PCH2_HUMAN]	1.0207e-08	1.46601e-09	TRIP13
Q92890	3	3	131.7	2.42762	HLE	Huh7	Ubiquitin fusion degradation protein 1 homolog OS=Homo sapiens GN=UFD1L PE=1 SV=3 - [UFD1_HUMAN]	5.64676e-11	2.74652e-12	UFD1L
P52732	2	2	65.69	2.42095	HLE	Huh7	Kinesin-like protein KIF11 OS=Homo sapiens GN=KIF11 PE=1 SV=2 - [KIF11_HUMAN]	3.58069e-07	8.50008e-08	KIF11
Q9NX47	2	2	113.32	2.41943	HLE	Huh7	E3 ubiquitin-protein ligase MARCH5 OS=Homo sapiens GN=MARCH5 PE=1 SV=1 - [MARH5_HUMAN]	3.04871e-06	9.32873e-07	MARCH5
Q6P4A8	6	6	380.43	2.41698	HLE	Huh7	Phospholipase B-like 1 OS=Homo sapiens GN=PLBD1 PE=1 SV=2 - [PLBL1_HUMAN]	1.86523e-09	1.95663e-10	PLBD1
O43681	6	6	360.51	2.41463	HLE	Huh7	ATPase ASNA1 OS=Homo sapiens GN=ASNA1 PE=1 SV=2 - [ASNA_HUMAN]	1.78992e-08	2.84652e-09	ASNA1
Q16625	2	2	55.71	2.40343	HLE	Huh7	Occludin OS=Homo sapiens GN=OCLN PE=1 SV=1 - [OCLN_HUMAN]	1.598e-10	9.39658e-12	OCLN
P07919	2	2	185.79	2.39829	HLE	Huh7	Cytochrome b-c1 complex subunit 6, mitochondrial OS=Homo sapiens GN=UQCRH PE=1 SV=2 - [QCR6_HUMAN]	1.41491e-06	3.94943e-07	UQCRH
Q15758	4	4	253.95	2.39551	HLE	Huh7	Neutral amino acid transporter B(0) OS=Homo sapiens GN=SLC1A5 PE=1 SV=2 - [AAAT_HUMAN]	3.74471e-07	8.99817e-08	SLC1A5
O15460	4	4	137.82	2.3901	HLE	Huh7	Prolyl 4-hydroxylase subunit alpha-2 OS=Homo sapiens GN=P4HA2 PE=1 SV=1 - [P4HA2_HUMAN]	0.00966093	0.0061858	P4HA2
Q9UMY4	3	2	89.54	2.38356	HLE	Huh7	Sorting nexin-12 OS=Homo sapiens GN=SNX12 PE=1 SV=3 - [SNX12_HUMAN]	4.18509e-06	1.31857e-06	SNX12
P00492	4	4	223.32	2.37337	HLE	Huh7	Hypoxanthine-guanine phosphoribosyltransferase OS=Homo sapiens GN=HPRT1 PE=1 SV=2 - [HPRT_HUMAN]	2.2492e-10	1.40422e-11	HPRT1
Q14978	4	4	139.73	2.36842	HLE	Huh7	Nucleolar and coiled-body phosphoprotein 1 OS=Homo sapiens GN=NOLC1 PE=1 SV=2 - [NOLC1_HUMAN]	4.40085e-06	1.39294e-06	NOLC1
Q96BR5	2	2	66.29	2.3663	HLE	Huh7	Sel1 repeat-containing protein 1 OS=Homo sapiens GN=SELRC1 PE=1 SV=2 - [SELR1_HUMAN]	2.17977e-05	8.16524e-06	SELRC1
P20700	24	22	1475.83	2.3658	HLE	Huh7	Lamin-B1 OS=Homo sapiens GN=LMNB1 PE=1 SV=2 - [LMNB1_HUMAN]	3.25362e-08	5.69236e-09	LMNB1
Q8N183	3	3	75.93	2.36326	HLE	Huh7	Mimitin, mitochondrial OS=Homo sapiens GN=NDUFAF2 PE=1 SV=1 - [MIMIT_HUMAN]	7.81417e-08	1.51462e-08	NDUFAF2
Q16555	19	17	1538.68	2.36069	HLE	Huh7	Dihydropyrimidinase-related protein 2 OS=Homo sapiens GN=DPYSL2 PE=1 SV=1 - [DPYL2_HUMAN]	3.95624e-10	2.84899e-11	DPYSL2
P63000	6	2	347.54	2.35865	HLE	Huh7	Ras-related C3 botulinum toxin substrate 1 OS=Homo sapiens GN=RAC1 PE=1 SV=1 - [RAC1_HUMAN]	8.20835e-08	1.59698e-08	RAC1
Q9UJV9	3	3	128.58	2.35797	HLE	Huh7	Probable ATP-dependent RNA helicase DDX41 OS=Homo sapiens GN=DDX41 PE=1 SV=2 - [DDX41_HUMAN]	7.66406e-06	2.57323e-06	DDX41
P26885	3	3	131.5	2.35558	HLE	Huh7	Peptidyl-prolyl cis-trans isomerase FKBP2 OS=Homo sapiens GN=FKBP2 PE=1 SV=2 - [FKBP2_HUMAN]	3.17965e-07	7.4211e-08	FKBP2
Q15286	4	2	311.63	2.35023	HLE	Huh7	Ras-related protein Rab-35 OS=Homo sapiens GN=RAB35 PE=1 SV=1 - [RAB35_HUMAN]	4.57725e-07	1.12978e-07	RAB35
Q14126	4	4	154.3	2.34659	HLE	Huh7	Desmoglein-2 OS=Homo sapiens GN=DSG2 PE=1 SV=2 - [DSG2_HUMAN]	3.20522e-06	9.84253e-07	DSG2
O95490	6	6	291.05	2.33028	HLE	Huh7	Latrophilin-2 OS=Homo sapiens GN=LPHN2 PE=1 SV=2 - [LPHN2_HUMAN]	1.90136e-08	3.06427e-09	LPHN2
P35270	2	2	120.77	2.32698	HLE	Huh7	Sepiapterin reductase OS=Homo sapiens GN=SPR PE=1 SV=1 - [SPRE_HUMAN]	1.19006e-06	3.27861e-07	SPR
P06396	5	5	224.54	2.32622	HLE	Huh7	Gelsolin OS=Homo sapiens GN=GSN PE=1 SV=1 - [GELS_HUMAN]	2.67794e-09	2.99385e-10	GSN
O14773	4	4	250.72	2.3243	HLE	Huh7	Tripeptidyl-peptidase 1 OS=Homo sapiens GN=TPP1 PE=1 SV=2 - [TPP1_HUMAN]	1.34998e-07	2.86391e-08	TPP1
O43818	2	2	79.68	2.31002	HLE	Huh7	U3 small nucleolar RNA-interacting protein 2 OS=Homo sapiens GN=RRP9 PE=1 SV=1 - [U3IP2_HUMAN]	0.00144933	0.000784376	RRP9
Q96QK1	14	14	898.42	2.3088	HLE	Huh7	Vacuolar protein sorting-associated protein 35 OS=Homo sapiens GN=VPS35 PE=1 SV=2 - [VPS35_HUMAN]	1.3043e-08	1.98419e-09	VPS35
O75396	8	8	522.95	2.30257	HLE	Huh7	Vesicle-trafficking protein SEC22b OS=Homo sapiens GN=SEC22B PE=1 SV=4 - [SC22B_HUMAN]	8.47576e-08	1.65516e-08	SEC22B
P55084	12	12	641.21	2.30042	HLE	Huh7	Trifunctional enzyme subunit beta, mitochondrial OS=Homo sapiens GN=HADHB PE=1 SV=3 - [ECHB_HUMAN]	1.51627e-10	8.80595e-12	HADHB
Q12788	4	4	189.87	2.29857	HLE	Huh7	Transducin beta-like protein 3 OS=Homo sapiens GN=TBL3 PE=1 SV=2 - [TBL3_HUMAN]	7.34653e-08	1.41064e-08	TBL3
Q02809	10	10	618.49	2.2954	HLE	Huh7	Procollagen-lysine,2-oxoglutarate 5-dioxygenase 1 OS=Homo sapiens GN=PLOD1 PE=1 SV=2 - [PLOD1_HUMAN]	6.91625e-10	5.7238e-11	PLOD1
Q96AE4	9	8	613.41	2.29404	HLE	Huh7	Far upstream element-binding protein 1 OS=Homo sapiens GN=FUBP1 PE=1 SV=3 - [FUBP1_HUMAN]	4.67151e-08	8.49519e-09	FUBP1
Q99575	5	5	190.43	2.29386	HLE	Huh7	Ribonucleases P/MRP protein subunit POP1 OS=Homo sapiens GN=POP1 PE=1 SV=2 - [POP1_HUMAN]	1.56171e-08	2.43184e-09	POP1
Q5JTH9	7	7	406.53	2.29385	HLE	Huh7	RRP12-like protein OS=Homo sapiens GN=RRP12 PE=1 SV=2 - [RRP12_HUMAN]	4.47756e-08	8.09373e-09	RRP12
O95816	4	4	129.17	2.29005	HLE	Huh7	BAG family molecular chaperone regulator 2 OS=Homo sapiens GN=BAG2 PE=1 SV=1 - [BAG2_HUMAN]	1.7124e-07	3.74179e-08	BAG2
P23528	8	5	859.01	2.28623	HLE	Huh7	Cofilin-1 OS=Homo sapiens GN=CFL1 PE=1 SV=3 - [COF1_HUMAN]	2.78145e-06	8.42007e-07	CFL1
P10619	4	4	219.04	2.27693	HLE	Huh7	Lysosomal protective protein OS=Homo sapiens GN=CTSA PE=1 SV=2 - [PPGB_HUMAN]	9.35371e-06	3.21523e-06	CTSA
Q9UGV2	2	2	70.28	2.27216	HLE	Huh7	Protein NDRG3 OS=Homo sapiens GN=NDRG3 PE=1 SV=2 - [NDRG3_HUMAN]	1.34998e-07	2.87147e-08	NDRG3
P50552	4	4	309.26	2.2664	HLE	Huh7	Vasodilator-stimulated phosphoprotein OS=Homo sapiens GN=VASP PE=1 SV=3 - [VASP_HUMAN]	1.11664e-09	1.02544e-10	VASP
O95292	6	5	525.38	2.25692	HLE	Huh7	Vesicle-associated membrane protein-associated protein B/C OS=Homo sapiens GN=VAPB PE=1 SV=3 - [VAPB_HUMAN]	1.04407e-06	2.82713e-07	VAPB
Q9NR12	4	4	240.18	2.25453	HLE	Huh7	PDZ and LIM domain protein 7 OS=Homo sapiens GN=PDLIM7 PE=1 SV=1 - [PDLI7_HUMAN]	2.59837e-09	2.86716e-10	PDLIM7
Q5JTV8	3	3	183.99	2.25228	HLE	Huh7	Torsin-1A-interacting protein 1 OS=Homo sapiens GN=TOR1AIP1 PE=1 SV=2 - [TOIP1_HUMAN]	3.69032e-07	8.8273e-08	TOR1AIP1
P40939	29	29	2056.58	2.24794	HLE	Huh7	Trifunctional enzyme subunit alpha, mitochondrial OS=Homo sapiens GN=HADHA PE=1 SV=2 - [ECHA_HUMAN]	8.43557e-10	7.3486e-11	HADHA
Q9P0V9	3	3	137.19	2.24483	HLE	Huh7	Septin-10 OS=Homo sapiens GN=SEPT10 PE=1 SV=2 - [SEP10_HUMAN]	1.97194e-07	4.38765e-08	SEPT10
P61421	3	3	160.37	2.24391	HLE	Huh7	V-type proton ATPase subunit d 1 OS=Homo sapiens GN=ATP6V0D1 PE=1 SV=1 - [VA0D1_HUMAN]	1.00651e-05	3.47114e-06	ATP6V0D1
Q00325	9	9	568.83	2.2437	HLE	Huh7	Phosphate carrier protein, mitochondrial OS=Homo sapiens GN=SLC25A3 PE=1 SV=2 - [MPCP_HUMAN]	3.45594e-06	1.07302e-06	SLC25A3
P16401	6	5	549.83	2.24321	HLE	Huh7	Histone H1.5 OS=Homo sapiens GN=HIST1H1B PE=1 SV=3 - [H15_HUMAN]	0.000365273	0.000176041	HIST1H1B
P06748	11	11	1279.27	2.24167	HLE	Huh7	Nucleophosmin OS=Homo sapiens GN=NPM1 PE=1 SV=2 - [NPM_HUMAN]	5.68815e-07	1.43907e-07	NPM1
Q6IAA8	2	2	78.22	2.23906	HLE	Huh7	Ragulator complex protein LAMTOR1 OS=Homo sapiens GN=LAMTOR1 PE=1 SV=2 - [LTOR1_HUMAN]	0.000101939	4.35507e-05	LAMTOR1
Q7L576	5	5	252.45	2.22814	HLE	Huh7	Cytoplasmic FMR1-interacting protein 1 OS=Homo sapiens GN=CYFIP1 PE=1 SV=1 - [CYFP1_HUMAN]	2.1737e-07	4.8997e-08	CYFIP1
P63165	2	2	113.08	2.22761	HLE	Huh7	Small ubiquitin-related modifier 1 OS=Homo sapiens GN=SUMO1 PE=1 SV=1 - [SUMO1_HUMAN]	0.000130181	5.72703e-05	SUMO1
Q13740	12	12	661	2.21776	HLE	Huh7	CD166 antigen OS=Homo sapiens GN=ALCAM PE=1 SV=2 - [CD166_HUMAN]	2.92128e-08	5.02608e-09	ALCAM
P55795	12	4	1220.76	2.2149	HLE	Huh7	Heterogeneous nuclear ribonucleoprotein H2 OS=Homo sapiens GN=HNRNPH2 PE=1 SV=1 - [HNRH2_HUMAN]	2.17115e-08	3.56211e-09	HNRNPH2
Q6P587	3	3	180.3	2.21489	HLE	Huh7	Acylpyruvase FAHD1, mitochondrial OS=Homo sapiens GN=FAHD1 PE=1 SV=2 - [FAHD1_HUMAN]	2.23286e-06	6.58916e-07	FAHD1
P15586	7	7	392.69	2.213	HLE	Huh7	N-acetylglucosamine-6-sulfatase OS=Homo sapiens GN=GNS PE=1 SV=3 - [GNS_HUMAN]	5.3247e-08	9.93428e-09	GNS
Q969N2	2	2	96.85	2.2066	HLE	Huh7	GPI transamidase component PIG-T OS=Homo sapiens GN=PIGT PE=1 SV=1 - [PIGT_HUMAN]	4.05529e-07	9.8475e-08	PIGT
P21796	18	17	1619.13	2.20321	HLE	Huh7	Voltage-dependent anion-selective channel protein 1 OS=Homo sapiens GN=VDAC1 PE=1 SV=2 - [VDAC1_HUMAN]	4.75881e-08	8.72304e-09	VDAC1
O43264	2	2	81.38	2.19009	HLE	Huh7	Centromere/kinetochore protein zw10 homolog OS=Homo sapiens GN=ZW10 PE=1 SV=3 - [ZW10_HUMAN]	6.67628e-06	2.21278e-06	ZW10
P13797	6	4	317.99	2.18849	HLE	Huh7	Plastin-3 OS=Homo sapiens GN=PLS3 PE=1 SV=4 - [PLST_HUMAN]	1.60069e-07	3.46284e-08	PLS3
P12081	7	4	440.01	2.18468	HLE	Huh7	Histidine--tRNA ligase, cytoplasmic OS=Homo sapiens GN=HARS PE=1 SV=2 - [SYHC_HUMAN]	3.06028e-10	2.08832e-11	HARS
P43246	8	8	448.15	2.17489	HLE	Huh7	DNA mismatch repair protein Msh2 OS=Homo sapiens GN=MSH2 PE=1 SV=1 - [MSH2_HUMAN]	7.33537e-10	6.17715e-11	MSH2
O95299	2	2	90.31	2.17489	HLE	Huh7	NADH dehydrogenase [ubiquinone] 1 alpha subcomplex subunit 10, mitochondrial OS=Homo sapiens GN=NDUFA10 PE=1 SV=1 - [NDUAA_HUMAN]	5.75105e-06	1.88083e-06	NDUFA10
Q6P1L8	2	2	59.76	2.17272	HLE	Huh7	39S ribosomal protein L14, mitochondrial OS=Homo sapiens GN=MRPL14 PE=1 SV=1 - [RM14_HUMAN]	8.9925e-07	2.38929e-07	MRPL14
Q96RQ1	2	2	70.69	2.15767	HLE	Huh7	Endoplasmic reticulum-Golgi intermediate compartment protein 2 OS=Homo sapiens GN=ERGIC2 PE=1 SV=2 - [ERGI2_HUMAN]	6.89174e-06	2.29141e-06	ERGIC2
O95470	4	4	194.16	2.14435	HLE	Huh7	Sphingosine-1-phosphate lyase 1 OS=Homo sapiens GN=SGPL1 PE=1 SV=3 - [SGPL1_HUMAN]	1.44804e-08	2.22331e-09	SGPL1
Q13428	2	2	96.7	2.14366	HLE	Huh7	Treacle protein OS=Homo sapiens GN=TCOF1 PE=1 SV=3 - [TCOF_HUMAN]	0.000145234	6.44197e-05	TCOF1
O75306	4	4	158.41	2.14219	HLE	Huh7	NADH dehydrogenase [ubiquinone] iron-sulfur protein 2, mitochondrial OS=Homo sapiens GN=NDUFS2 PE=1 SV=2 - [NDUS2_HUMAN]	2.51471e-05	9.58418e-06	NDUFS2
Q6FI81	3	3	163.37	2.12549	HLE	Huh7	Anamorsin OS=Homo sapiens GN=CIAPIN1 PE=1 SV=2 - [CPIN1_HUMAN]	1.50657e-06	4.24892e-07	CIAPIN1
Q969G3	3	3	251.89	2.12509	HLE	Huh7	SWI/SNF-related matrix-associated actin-dependent regulator of chromatin subfamily E member 1 OS=Homo sapiens GN=SMARCE1 PE=1 SV=2 - [SMCE1_HUMAN]	7.11387e-07	1.84367e-07	SMARCE1
P61224	7	2	514.62	2.12118	HLE	Huh7	Ras-related protein Rap-1b OS=Homo sapiens GN=RAP1B PE=1 SV=1 - [RAP1B_HUMAN]	7.81218e-06	2.63147e-06	RAP1B
Q15293	3	3	201.29	2.11191	HLE	Huh7	Reticulocalbin-1 OS=Homo sapiens GN=RCN1 PE=1 SV=1 - [RCN1_HUMAN]	1.03463e-05	3.58269e-06	RCN1
P61020	6	3	496.63	2.11132	HLE	Huh7	Ras-related protein Rab-5B OS=Homo sapiens GN=RAB5B PE=1 SV=1 - [RAB5B_HUMAN]	7.1939e-07	1.87224e-07	RAB5B
Q15084	13	13	1305.16	2.10854	HLE	Huh7	Protein disulfide-isomerase A6 OS=Homo sapiens GN=PDIA6 PE=1 SV=1 - [PDIA6_HUMAN]	2.02689e-08	3.296e-09	PDIA6
P40123	2	2	91.34	2.10131	HLE	Huh7	Adenylyl cyclase-associated protein 2 OS=Homo sapiens GN=CAP2 PE=1 SV=1 - [CAP2_HUMAN]	3.79332e-06	1.18825e-06	CAP2
Q96I99	9	8	493.34	2.09129	HLE	Huh7	Succinyl-CoA ligase [GDP-forming] subunit beta, mitochondrial OS=Homo sapiens GN=SUCLG2 PE=1 SV=2 - [SUCB2_HUMAN]	4.20931e-07	1.02674e-07	SUCLG2
P14927	4	4	141.68	2.08428	HLE	Huh7	Cytochrome b-c1 complex subunit 7 OS=Homo sapiens GN=UQCRB PE=1 SV=2 - [QCR7_HUMAN]	2.04742e-07	4.59277e-08	UQCRB
Q9UNX4	4	4	146.1	2.08262	HLE	Huh7	WD repeat-containing protein 3 OS=Homo sapiens GN=WDR3 PE=1 SV=1 - [WDR3_HUMAN]	2.55999e-05	9.76607e-06	WDR3
P55145	3	3	173.77	2.08242	HLE	Huh7	Mesencephalic astrocyte-derived neurotrophic factor OS=Homo sapiens GN=MANF PE=1 SV=3 - [MANF_HUMAN]	4.8146e-07	1.1971e-07	MANF
Q8IZP0	2	2	113.12	2.08011	HLE	Huh7	Abl interactor 1 OS=Homo sapiens GN=ABI1 PE=1 SV=4 - [ABI1_HUMAN]	1.15052e-07	2.37621e-08	ABI1
Q9BSJ8	24	24	1605.22	2.0793	HLE	Huh7	Extended synaptotagmin-1 OS=Homo sapiens GN=ESYT1 PE=1 SV=1 - [ESYT1_HUMAN]	3.38365e-08	5.94441e-09	ESYT1
Q05397	2	2	76.69	2.06368	HLE	Huh7	Focal adhesion kinase 1 OS=Homo sapiens GN=PTK2 PE=1 SV=2 - [FAK1_HUMAN]	2.5369e-08	4.24504e-09	PTK2
Q01518	13	13	871.64	2.06111	HLE	Huh7	Adenylyl cyclase-associated protein 1 OS=Homo sapiens GN=CAP1 PE=1 SV=5 - [CAP1_HUMAN]	1.91413e-08	3.09179e-09	CAP1
P20340	4	3	253.8	2.05592	HLE	Huh7	Ras-related protein Rab-6A OS=Homo sapiens GN=RAB6A PE=1 SV=3 - [RAB6A_HUMAN]	2.31991e-07	5.25453e-08	RAB6A
P60709	36	18	3608.12	2.05417	HLE	Huh7	Actin, cytoplasmic 1 OS=Homo sapiens GN=ACTB PE=1 SV=1 - [ACTB_HUMAN]	1.0321e-08	1.48728e-09	ACTB
P16949	5	5	386.72	2.04986	HLE	Huh7	Stathmin OS=Homo sapiens GN=STMN1 PE=1 SV=3 - [STMN1_HUMAN]	3.6008e-07	8.57395e-08	STMN1
Q10471	5	5	329.02	2.04848	HLE	Huh7	Polypeptide N-acetylgalactosaminyltransferase 2 OS=Homo sapiens GN=GALNT2 PE=1 SV=1 - [GALT2_HUMAN]	1.68522e-06	4.83059e-07	GALNT2
P61019	11	11	935.06	2.04808	HLE	Huh7	Ras-related protein Rab-2A OS=Homo sapiens GN=RAB2A PE=1 SV=1 - [RAB2A_HUMAN]	4.49146e-07	1.10697e-07	RAB2A
Q8IXB1	2	2	78.61	2.04242	HLE	Huh7	DnaJ homolog subfamily C member 10 OS=Homo sapiens GN=DNAJC10 PE=1 SV=2 - [DJC10_HUMAN]	1.68572e-05	6.11266e-06	DNAJC10
Q8N2K0	3	3	114.69	2.03519	HLE	Huh7	Monoacylglycerol lipase ABHD12 OS=Homo sapiens GN=ABHD12 PE=2 SV=2 - [ABD12_HUMAN]	5.93736e-06	1.95038e-06	ABHD12
P07384	7	6	283.98	2.0345	HLE	Huh7	Calpain-1 catalytic subunit OS=Homo sapiens GN=CAPN1 PE=1 SV=1 - [CAN1_HUMAN]	7.85389e-11	4.13363e-12	CAPN1
Q13595	2	2	89.05	2.03363	HLE	Huh7	Transformer-2 protein homolog alpha OS=Homo sapiens GN=TRA2A PE=1 SV=1 - [TRA2A_HUMAN]	5.7364e-07	1.45753e-07	TRA2A
Q92542	4	4	196.36	2.03067	HLE	Huh7	Nicastrin OS=Homo sapiens GN=NCSTN PE=1 SV=2 - [NICA_HUMAN]	3.17576e-09	3.71177e-10	NCSTN
P08574	6	6	304.98	2.03062	HLE	Huh7	Cytochrome c1, heme protein, mitochondrial OS=Homo sapiens GN=CYC1 PE=1 SV=3 - [CY1_HUMAN]	2.04023e-07	4.55442e-08	CYC1
Q9H4M9	3	2	103.39	2.0295	HLE	Huh7	EH domain-containing protein 1 OS=Homo sapiens GN=EHD1 PE=1 SV=2 - [EHD1_HUMAN]	3.25354e-06	1.00027e-06	EHD1
P31937	2	2	75	2.0268	HLE	Huh7	3-hydroxyisobutyrate dehydrogenase, mitochondrial OS=Homo sapiens GN=HIBADH PE=1 SV=2 - [3HIDH_HUMAN]	1.27537e-05	4.47654e-06	HIBADH
P30044	11	11	608.7	2.02279	HLE	Huh7	Peroxiredoxin-5, mitochondrial OS=Homo sapiens GN=PRDX5 PE=1 SV=4 - [PRDX5_HUMAN]	1.16503e-10	6.5969e-12	PRDX5
P12814	29	16	2059.86	2.02231	HLE	Huh7	Alpha-actinin-1 OS=Homo sapiens GN=ACTN1 PE=1 SV=2 - [ACTN1_HUMAN]	3.37525e-07	7.93888e-08	ACTN1
P27824	11	11	964.53	2.02137	HLE	Huh7	Calnexin OS=Homo sapiens GN=CANX PE=1 SV=2 - [CALX_HUMAN]	1.18408e-07	2.44983e-08	CANX
Q15642	3	3	177.36	2.01732	HLE	Huh7	Cdc42-interacting protein 4 OS=Homo sapiens GN=TRIP10 PE=1 SV=3 - [CIP4_HUMAN]	5.09781e-06	1.64684e-06	TRIP10
Q14203	6	6	308.41	2.01517	HLE	Huh7	Dynactin subunit 1 OS=Homo sapiens GN=DCTN1 PE=1 SV=3 - [DCTN1_HUMAN]	1.33903e-07	2.83358e-08	DCTN1
Q9BVP2	8	8	439.74	2.012	HLE	Huh7	Guanine nucleotide-binding protein-like 3 OS=Homo sapiens GN=GNL3 PE=1 SV=2 - [GNL3_HUMAN]	1.03328e-07	2.10781e-08	GNL3
O00154	3	3	190.79	2.01182	HLE	Huh7	Cytosolic acyl coenzyme A thioester hydrolase OS=Homo sapiens GN=ACOT7 PE=1 SV=3 - [BACH_HUMAN]	1.08586e-08	1.58445e-09	ACOT7
Q99622	2	2	71.16	2.0109	HLE	Huh7	Protein C10 OS=Homo sapiens GN=C12orf57 PE=1 SV=1 - [C10_HUMAN]	4.20653e-07	1.023e-07	C12orf57
P35080	2	2	117.86	2.00872	HLE	Huh7	Profilin-2 OS=Homo sapiens GN=PFN2 PE=1 SV=3 - [PROF2_HUMAN]	4.39241e-07	1.08096e-07	PFN2
Q9HAV0	6	3	297.75	1.99783	HLE	Huh7	Guanine nucleotide-binding protein subunit beta-4 OS=Homo sapiens GN=GNB4 PE=1 SV=3 - [GBB4_HUMAN]	1.4878e-06	4.18527e-07	GNB4
P78406	2	2	78.44	1.99359	HLE	Huh7	mRNA export factor OS=Homo sapiens GN=RAE1 PE=1 SV=1 - [RAE1L_HUMAN]	1.45589e-06	4.08495e-07	RAE1
Q13561	12	12	741.31	1.99019	HLE	Huh7	Dynactin subunit 2 OS=Homo sapiens GN=DCTN2 PE=1 SV=4 - [DCTN2_HUMAN]	1.07916e-06	2.93781e-07	DCTN2
P78310	3	3	97.09	1.97031	HLE	Huh7	Coxsackievirus and adenovirus receptor OS=Homo sapiens GN=CXADR PE=1 SV=1 - [CXAR_HUMAN]	1.83545e-05	6.74219e-06	CXADR
Q9H0A0	10	10	420.91	1.96671	HLE	Huh7	N-acetyltransferase 10 OS=Homo sapiens GN=NAT10 PE=1 SV=2 - [NAT10_HUMAN]	7.56547e-08	1.46092e-08	NAT10
P49591	3	3	140.35	1.96583	HLE	Huh7	Serine--tRNA ligase, cytoplasmic OS=Homo sapiens GN=SARS PE=1 SV=3 - [SYSC_HUMAN]	8.3802e-06	2.84105e-06	SARS
Q9Y2A7	3	3	137.86	1.9646	HLE	Huh7	Nck-associated protein 1 OS=Homo sapiens GN=NCKAP1 PE=1 SV=1 - [NCKP1_HUMAN]	6.63974e-06	2.19634e-06	NCKAP1
Q9UBQ0	2	2	220.06	1.94353	HLE	Huh7	Vacuolar protein sorting-associated protein 29 OS=Homo sapiens GN=VPS29 PE=1 SV=1 - [VPS29_HUMAN]	3.43509e-07	8.11703e-08	VPS29
O15294	2	2	108.29	1.94281	HLE	Huh7	UDP-N-acetylglucosamine--peptide N-acetylglucosaminyltransferase 110 kDa subunit OS=Homo sapiens GN=OGT PE=1 SV=3 - [OGT1_HUMAN]	5.8122e-06	1.90505e-06	OGT
Q03252	11	9	603.41	1.93829	HLE	Huh7	Lamin-B2 OS=Homo sapiens GN=LMNB2 PE=1 SV=4 - [LMNB2_HUMAN]	4.64047e-08	8.4219e-09	LMNB2
P07437	44	5	4274.84	1.92371	HLE	Huh7	Tubulin beta chain OS=Homo sapiens GN=TUBB PE=1 SV=2 - [TBB5_HUMAN]	1.37748e-05	4.89493e-06	TUBB
O15160	4	4	195.41	1.92369	HLE	Huh7	DNA-directed RNA polymerases I and III subunit RPAC1 OS=Homo sapiens GN=POLR1C PE=1 SV=1 - [RPAC1_HUMAN]	3.32855e-05	1.29638e-05	POLR1C
Q15369	2	2	204.31	1.92301	HLE	Huh7	Transcription elongation factor B polypeptide 1 OS=Homo sapiens GN=TCEB1 PE=1 SV=1 - [ELOC_HUMAN]	3.45594e-06	1.07379e-06	TCEB1
P08754	9	5	668.5	1.92166	HLE	Huh7	Guanine nucleotide-binding protein G(k) subunit alpha OS=Homo sapiens GN=GNAI3 PE=1 SV=3 - [GNAI3_HUMAN]	2.45681e-07	5.59137e-08	GNAI3
Q9BTE3	3	3	161.53	1.91917	HLE	Huh7	Mini-chromosome maintenance complex-binding protein OS=Homo sapiens GN=MCMBP PE=1 SV=2 - [MCMBP_HUMAN]	2.85453e-07	6.6105e-08	MCMBP
P57764	2	2	68.32	1.91851	HLE	Huh7	Gasdermin-D OS=Homo sapiens GN=GSDMD PE=1 SV=1 - [GSDMD_HUMAN]	2.38754e-08	3.97779e-09	GSDMD
Q15269	2	2	66.94	1.91259	HLE	Huh7	Periodic tryptophan protein 2 homolog OS=Homo sapiens GN=PWP2 PE=1 SV=2 - [PWP2_HUMAN]	2.57768e-05	9.8475e-06	PWP2
Q1KMD3	14	14	1004.38	1.91232	HLE	Huh7	Heterogeneous nuclear ribonucleoprotein U-like protein 2 OS=Homo sapiens GN=HNRNPUL2 PE=1 SV=1 - [HNRL2_HUMAN]	5.38661e-08	1.00693e-08	HNRNPUL2
O43390	23	16	1461.18	1.91194	HLE	Huh7	Heterogeneous nuclear ribonucleoprotein R OS=Homo sapiens GN=HNRNPR PE=1 SV=1 - [HNRPR_HUMAN]	5.08676e-07	1.274e-07	HNRNPR
O43292	2	2	68.46	1.91113	HLE	Huh7	Glycosylphosphatidylinositol anchor attachment 1 protein OS=Homo sapiens GN=GPAA1 PE=1 SV=3 - [GPAA1_HUMAN]	1.73483e-06	5.00613e-07	GPAA1
Q8IWA0	2	2	98.14	1.91094	HLE	Huh7	WD repeat-containing protein 75 OS=Homo sapiens GN=WDR75 PE=1 SV=1 - [WDR75_HUMAN]	2.23286e-06	6.58269e-07	WDR75
Q9BTV4	7	7	351.87	1.90414	HLE	Huh7	Transmembrane protein 43 OS=Homo sapiens GN=TMEM43 PE=1 SV=1 - [TMM43_HUMAN]	4.20818e-07	1.02493e-07	TMEM43
Q9BYT8	6	6	353.61	1.89236	HLE	Huh7	Neurolysin, mitochondrial OS=Homo sapiens GN=NLN PE=1 SV=1 - [NEUL_HUMAN]	6.39196e-08	1.20647e-08	NLN
Q9P2J5	15	15	730.83	1.8907	HLE	Huh7	Leucine--tRNA ligase, cytoplasmic OS=Homo sapiens GN=LARS PE=1 SV=2 - [SYLC_HUMAN]	8.1284e-07	2.13315e-07	LARS
Q16795	6	6	220.26	1.88639	HLE	Huh7	NADH dehydrogenase [ubiquinone] 1 alpha subcomplex subunit 9, mitochondrial OS=Homo sapiens GN=NDUFA9 PE=1 SV=2 - [NDUA9_HUMAN]	4.62197e-06	1.47131e-06	NDUFA9
P22695	10	10	682.71	1.8846	HLE	Huh7	Cytochrome b-c1 complex subunit 2, mitochondrial OS=Homo sapiens GN=UQCRC2 PE=1 SV=3 - [QCR2_HUMAN]	1.75077e-08	2.76851e-09	UQCRC2
P09543	3	3	151.62	1.88431	HLE	Huh7	2',3'-cyclic-nucleotide 3'-phosphodiesterase OS=Homo sapiens GN=CNP PE=1 SV=2 - [CN37_HUMAN]	1.21075e-05	4.22772e-06	CNP
P11216	6	4	338.97	1.88189	HLE	Huh7	Glycogen phosphorylase, brain form OS=Homo sapiens GN=PYGB PE=1 SV=5 - [PYGB_HUMAN]	1.71173e-07	3.73412e-08	PYGB
Q9NP72	2	2	158.77	1.87495	HLE	Huh7	Ras-related protein Rab-18 OS=Homo sapiens GN=RAB18 PE=1 SV=1 - [RAB18_HUMAN]	1.5724e-05	5.6732e-06	RAB18
P27816	15	15	923.58	1.87007	HLE	Huh7	Microtubule-associated protein 4 OS=Homo sapiens GN=MAP4 PE=1 SV=3 - [MAP4_HUMAN]	5.33454e-09	6.932e-10	MAP4
P53597	3	3	159.76	1.86922	HLE	Huh7	Succinyl-CoA ligase [ADP/GDP-forming] subunit alpha, mitochondrial OS=Homo sapiens GN=SUCLG1 PE=1 SV=4 - [SUCA_HUMAN]	1.99083e-06	5.81713e-07	SUCLG1
P52597	9	6	981.48	1.86835	HLE	Huh7	Heterogeneous nuclear ribonucleoprotein F OS=Homo sapiens GN=HNRNPF PE=1 SV=3 - [HNRPF_HUMAN]	2.02534e-06	5.92531e-07	HNRNPF
Q9NX63	3	3	248.49	1.86672	HLE	Huh7	Coiled-coil-helix-coiled-coil-helix domain-containing protein 3, mitochondrial OS=Homo sapiens GN=CHCHD3 PE=1 SV=1 - [CHCH3_HUMAN]	8.37487e-05	3.51714e-05	CHCHD3
P21964	3	3	234.91	1.86447	HLE	Huh7	Catechol O-methyltransferase OS=Homo sapiens GN=COMT PE=1 SV=2 - [COMT_HUMAN]	1.92948e-08	3.12358e-09	COMT
Q15233	10	10	946.47	1.86361	HLE	Huh7	Non-POU domain-containing octamer-binding protein OS=Homo sapiens GN=NONO PE=1 SV=4 - [NONO_HUMAN]	8.91598e-07	2.36573e-07	NONO
P37108	5	5	549.95	1.86002	HLE	Huh7	Signal recognition particle 14 kDa protein OS=Homo sapiens GN=SRP14 PE=1 SV=2 - [SRP14_HUMAN]	4.08579e-08	7.26692e-09	SRP14
Q96S52	3	3	108.11	1.85994	HLE	Huh7	GPI transamidase component PIG-S OS=Homo sapiens GN=PIGS PE=1 SV=3 - [PIGS_HUMAN]	2.51546e-06	7.52356e-07	PIGS
Q9NZL9	5	5	317.3	1.85608	HLE	Huh7	Methionine adenosyltransferase 2 subunit beta OS=Homo sapiens GN=MAT2B PE=1 SV=1 - [MAT2B_HUMAN]	4.58048e-07	1.13223e-07	MAT2B
Q96FW1	4	4	352.82	1.85246	HLE	Huh7	Ubiquitin thioesterase OTUB1 OS=Homo sapiens GN=OTUB1 PE=1 SV=2 - [OTUB1_HUMAN]	2.89774e-07	6.72107e-08	OTUB1
P61163	9	6	457.5	1.84968	HLE	Huh7	Alpha-centractin OS=Homo sapiens GN=ACTR1A PE=1 SV=1 - [ACTZ_HUMAN]	1.11889e-08	1.64482e-09	ACTR1A
Q9NQW7	2	2	91.9	1.84639	HLE	Huh7	Xaa-Pro aminopeptidase 1 OS=Homo sapiens GN=XPNPEP1 PE=1 SV=3 - [XPP1_HUMAN]	0.000123537	5.39436e-05	XPNP1
P53582	4	4	253.62	1.83321	HLE	Huh7	Methionine aminopeptidase 1 OS=Homo sapiens GN=METAP1 PE=1 SV=2 - [AMPM1_HUMAN]	1.13518e-08	1.68467e-09	METAP1
Q8TBC4	4	4	178.63	1.82953	HLE	Huh7	NEDD8-activating enzyme E1 catalytic subunit OS=Homo sapiens GN=UBA3 PE=1 SV=2 - [UBA3_HUMAN]	8.34271e-06	2.82406e-06	UBA3
P13489	14	14	1181	1.8281	HLE	Huh7	Ribonuclease inhibitor OS=Homo sapiens GN=RNH1 PE=1 SV=2 - [RINI_HUMAN]	7.15144e-08	1.36539e-08	RNH1
Q96GQ7	6	6	366.15	1.82683	HLE	Huh7	Probable ATP-dependent RNA helicase DDX27 OS=Homo sapiens GN=DDX27 PE=1 SV=2 - [DDX27_HUMAN]	0.000160421	7.15635e-05	DDX27
P31946	12	7	705.99	1.82494	HLE	Huh7	14-3-3 protein beta/alpha OS=Homo sapiens GN=YWHAB PE=1 SV=3 - [1433B_HUMAN]	8.94669e-06	3.06233e-06	YWHAB
Q9Y2G5	2	2	79.02	1.82151	HLE	Huh7	GDP-fucose protein O-fucosyltransferase 2 OS=Homo sapiens GN=POFUT2 PE=1 SV=3 - [OFUT2_HUMAN]	1.1174e-07	2.30375e-08	POFUT2
P45880	12	12	1048.2	1.82128	HLE	Huh7	Voltage-dependent anion-selective channel protein 2 OS=Homo sapiens GN=VDAC2 PE=1 SV=2 - [VDAC2_HUMAN]	8.58467e-06	2.91661e-06	VDAC2
P29966	5	5	336.26	1.8205	HLE	Huh7	Myristoylated alanine-rich C-kinase substrate OS=Homo sapiens GN=MARCKS PE=1 SV=4 - [MARCS_HUMAN]	0.00562884	0.00345903	MARCKS
P49748	14	13	750.43	1.8159	HLE	Huh7	Very long-chain specific acyl-CoA dehydrogenase, mitochondrial OS=Homo sapiens GN=ACADVL PE=1 SV=1 - [ACADV_HUMAN]	9.09188e-09	1.28705e-09	ACADVL
Q70UQ0	2	2	116.47	1.81578	HLE	Huh7	Inhibitor of nuclear factor kappa-B kinase-interacting protein OS=Homo sapiens GN=IKBIP PE=1 SV=1 - [IKIP_HUMAN]	0.000127726	5.60047e-05	IKBIP
Q9NR28	5	5	411.18	1.81299	HLE	Huh7	Diablo homolog, mitochondrial OS=Homo sapiens GN=DIABLO PE=1 SV=1 - [DBLOH_HUMAN]	6.1673e-06	2.0304e-06	DIABLO
Q9BZF1	2	2	96.94	1.81157	HLE	Huh7	Oxysterol-binding protein-related protein 8 OS=Homo sapiens GN=OSBPL8 PE=1 SV=3 - [OSBL8_HUMAN]	0.000533054	0.000265656	OSBPL8
P63104	13	9	1059.84	1.8087	HLE	Huh7	14-3-3 protein zeta/delta OS=Homo sapiens GN=YWHAZ PE=1 SV=1 - [1433Z_HUMAN]	2.11117e-05	7.87875e-06	YWHAZ
Q8NI36	2	2	65.76	1.80853	HLE	Huh7	WD repeat-containing protein 36 OS=Homo sapiens GN=WDR36 PE=1 SV=1 - [WDR36_HUMAN]	1.13673e-06	3.10281e-07	WDR36
Q9H444	2	2	165.57	1.80406	HLE	Huh7	Charged multivesicular body protein 4b OS=Homo sapiens GN=CHMP4B PE=1 SV=1 - [CHM4B_HUMAN]	5.9021e-05	2.41868e-05	CHMP4B
Q12931	15	13	1191.94	1.8028	HLE	Huh7	Heat shock protein 75 kDa, mitochondrial OS=Homo sapiens GN=TRAP1 PE=1 SV=3 - [TRAP1_HUMAN]	1.77825e-06	5.15078e-07	TRAP1
Q9Y3B3	3	3	221.5	1.78831	HLE	Huh7	Transmembrane emp24 domain-containing protein 7 OS=Homo sapiens GN=TMED7 PE=1 SV=2 - [TMED7_HUMAN]	8.75378e-06	2.98042e-06	TMED7
O96005	2	2	110.47	1.78454	HLE	Huh7	Cleft lip and palate transmembrane protein 1 OS=Homo sapiens GN=CLPTM1 PE=1 SV=1 - [CLPT1_HUMAN]	0.00010964	4.72785e-05	CLPTM1
P56182	2	2	116.87	1.78323	HLE	Huh7	Ribosomal RNA processing protein 1 homolog A OS=Homo sapiens GN=RRP1 PE=1 SV=1 - [RRP1_HUMAN]	0.000597467	0.000300143	RRP1
Q92692	3	3	166.74	1.78265	HLE	Huh7	Poliovirus receptor-related protein 2 OS=Homo sapiens GN=PVRL2 PE=1 SV=1 - [PVRL2_HUMAN]	0.000112579	4.87095e-05	PVRL2
O60664	14	14	981.35	1.77502	HLE	Huh7	Perilipin-3 OS=Homo sapiens GN=PLIN3 PE=1 SV=3 - [PLIN3_HUMAN]	2.98617e-09	3.40347e-10	PLIN3
Q9P015	9	9	404.45	1.77478	HLE	Huh7	39S ribosomal protein L15, mitochondrial OS=Homo sapiens GN=MRPL15 PE=1 SV=1 - [RM15_HUMAN]	1.77825e-06	5.14746e-07	MRPL15
Q9Y6C9	5	5	263.75	1.77256	HLE	Huh7	Mitochondrial carrier homolog 2 OS=Homo sapiens GN=MTCH2 PE=1 SV=1 - [MTCH2_HUMAN]	0.000209931	9.63932e-05	MTCH2
P98179	3	3	206.26	1.76956	HLE	Huh7	Putative RNA-binding protein 3 OS=Homo sapiens GN=RBM3 PE=1 SV=1 - [RBM3_HUMAN]	4.73275e-06	1.51173e-06	RBM3
P29590	2	2	87.58	1.76432	HLE	Huh7	Protein PML OS=Homo sapiens GN=PML PE=1 SV=3 - [PML_HUMAN]	0.000118452	5.15515e-05	PML
Q15019	11	11	821.9	1.76414	HLE	Huh7	Septin-2 OS=Homo sapiens GN=SEPT2 PE=1 SV=1 - [SEPT2_HUMAN]	4.81557e-09	6.01291e-10	SEPT2
P67812	2	2	106.88	1.75726	HLE	Huh7	Signal peptidase complex catalytic subunit SEC11A OS=Homo sapiens GN=SEC11A PE=1 SV=1 - [SC11A_HUMAN]	7.77243e-05	3.25003e-05	SEC11A
Q16658	8	8	459.33	1.75581	HLE	Huh7	Fascin OS=Homo sapiens GN=FSCN1 PE=1 SV=3 - [FSCN1_HUMAN]	4.44258e-08	8.00809e-09	FSCN1
P28340	2	2	67.29	1.75509	HLE	Huh7	DNA polymerase delta catalytic subunit OS=Homo sapiens GN=POLD1 PE=1 SV=2 - [DPOD1_HUMAN]	1.70627e-06	4.91752e-07	POLD1
P62330	4	3	152.6	1.75205	HLE	Huh7	ADP-ribosylation factor 6 OS=Homo sapiens GN=ARF6 PE=1 SV=2 - [ARF6_HUMAN]	0.00255627	0.00146974	ARF6
Q96HY6	2	2	124.14	1.7509	HLE	Huh7	DDRGK domain-containing protein 1 OS=Homo sapiens GN=DDRGK1 PE=1 SV=2 - [DDRGK_HUMAN]	0.00101151	0.000534211	DDRGK1
P20337	4	2	183.83	1.75085	HLE	Huh7	Ras-related protein Rab-3B OS=Homo sapiens GN=RAB3B PE=1 SV=2 - [RAB3B_HUMAN]	0.000542176	0.000270399	RAB3B
O95881	5	5	282.04	1.75044	HLE	Huh7	Thioredoxin domain-containing protein 12 OS=Homo sapiens GN=TXNDC12 PE=1 SV=1 - [TXD12_HUMAN]	2.90178e-05	1.11963e-05	TXNDC12
Q16181	7	6	346.48	1.74797	HLE	Huh7	Septin-7 OS=Homo sapiens GN=SEPT7 PE=1 SV=2 - [SEPT7_HUMAN]	1.33455e-11	4.45658e-13	SEPT7
P51570	3	3	85.95	1.74699	HLE	Huh7	Galactokinase OS=Homo sapiens GN=GALK1 PE=1 SV=1 - [GALK1_HUMAN]	0.000623148	0.000313723	GALK1
P62942	3	3	263.62	1.74629	HLE	Huh7	Peptidyl-prolyl cis-trans isomerase FKBP1A OS=Homo sapiens GN=FKBP1A PE=1 SV=2 - [FKB1A_HUMAN]	0.00348934	0.00207334	FKBP1A
O00264	6	6	372.2	1.74477	HLE	Huh7	Membrane-associated progesterone receptor component 1 OS=Homo sapiens GN=PGRMC1 PE=1 SV=3 - [PGRC1_HUMAN]	1.24813e-06	3.45061e-07	PGRMC1
Q5T4S7	6	6	220.92	1.74296	HLE	Huh7	E3 ubiquitin-protein ligase UBR4 OS=Homo sapiens GN=UBR4 PE=1 SV=1 - [UBR4_HUMAN]	2.57978e-06	7.7253e-07	UBR4
Q9Y5K6	3	3	149.16	1.73626	HLE	Huh7	CD2-associated protein OS=Homo sapiens GN=CD2AP PE=1 SV=1 - [CD2AP_HUMAN]	5.60695e-07	1.41649e-07	CD2AP
P52907	6	5	403.83	1.73623	HLE	Huh7	F-actin-capping protein subunit alpha-1 OS=Homo sapiens GN=CAPZA1 PE=1 SV=3 - [CAZA1_HUMAN]	1.56545e-07	3.37524e-08	CAPZA1
Q07960	4	4	136.07	1.73578	HLE	Huh7	Rho GTPase-activating protein 1 OS=Homo sapiens GN=ARHGAP1 PE=1 SV=1 - [RHG01_HUMAN]	1.53395e-05	5.49548e-06	ARHGAP1
P49411	14	14	1217.07	1.73463	HLE	Huh7	Elongation factor Tu, mitochondrial OS=Homo sapiens GN=TUFM PE=1 SV=2 - [EFTU_HUMAN]	5.13634e-06	1.66115e-06	TUFM
P29401	22	22	1785.34	1.73332	HLE	Huh7	Transketolase OS=Homo sapiens GN=TKT PE=1 SV=3 - [TKT_HUMAN]	2.15882e-07	4.85049e-08	TKT
O75390	10	10	649.45	1.73256	HLE	Huh7	Citrate synthase, mitochondrial OS=Homo sapiens GN=CS PE=1 SV=2 - [CISY_HUMAN]	3.42957e-07	8.09154e-08	CS
P31942	5	3	500.96	1.7292	HLE	Huh7	Heterogeneous nuclear ribonucleoprotein H3 OS=Homo sapiens GN=HNRNPH3 PE=1 SV=2 - [HNRH3_HUMAN]	0.000109423	4.7145e-05	HNRNPH3
O60888	3	3	218.41	1.72855	HLE	Huh7	Protein CutA OS=Homo sapiens GN=CUTA PE=1 SV=2 - [CUTA_HUMAN]	8.49498e-07	2.24477e-07	CUTA
Q9BUQ8	4	4	173.3	1.72753	HLE	Huh7	Probable ATP-dependent RNA helicase DDX23 OS=Homo sapiens GN=DDX23 PE=1 SV=3 - [DDX23_HUMAN]	1.19573e-05	4.17095e-06	DDX23
Q9H7B2	2	2	75.38	1.72623	HLE	Huh7	Ribosome production factor 2 homolog OS=Homo sapiens GN=RPF2 PE=1 SV=2 - [RPF2_HUMAN]	0.0156467	0.010399	RPF2
O75521	3	3	176.11	1.72541	HLE	Huh7	Enoyl-CoA delta isomerase 2, mitochondrial OS=Homo sapiens GN=ECI2 PE=1 SV=4 - [ECI2_HUMAN]	1.33487e-06	3.71631e-07	ECI2
Q14247	5	5	314.59	1.72498	HLE	Huh7	Src substrate cortactin OS=Homo sapiens GN=CTTN PE=1 SV=2 - [SRC8_HUMAN]	4.7808e-08	8.7807e-09	CTTN
Q9Y3T9	3	3	136.14	1.72411	HLE	Huh7	Nucleolar complex protein 2 homolog OS=Homo sapiens GN=NOC2L PE=1 SV=4 - [NOC2L_HUMAN]	0.000266964	0.000125585	NOC2L
P35232	15	15	1101.2	1.72389	HLE	Huh7	Prohibitin OS=Homo sapiens GN=PHB PE=1 SV=1 - [PHB_HUMAN]	7.02899e-06	2.34215e-06	PHB
Q16576	7	2	352.5	1.71927	HLE	Huh7	Histone-binding protein RBBP7 OS=Homo sapiens GN=RBBP7 PE=1 SV=1 - [RBBP7_HUMAN]	0.000639581	0.000323157	RBBP7
Q99623	11	11	801.22	1.71828	HLE	Huh7	Prohibitin-2 OS=Homo sapiens GN=PHB2 PE=1 SV=2 - [PHB2_HUMAN]	2.81163e-07	6.49073e-08	PHB2
P17152	2	2	60.23	1.71536	HLE	Huh7	Transmembrane protein 11, mitochondrial OS=Homo sapiens GN=TMEM11 PE=1 SV=1 - [TMM11_HUMAN]	0.000136913	6.05799e-05	TMEM11
P51148	8	5	624.59	1.7135	HLE	Huh7	Ras-related protein Rab-5C OS=Homo sapiens GN=RAB5C PE=1 SV=2 - [RAB5C_HUMAN]	5.47471e-05	2.22373e-05	RAB5C
P46013	7	7	349.89	1.71258	HLE	Huh7	Antigen KI-67 OS=Homo sapiens GN=MKI67 PE=1 SV=2 - [KI67_HUMAN]	2.85724e-06	8.68533e-07	MKI67
Q86UE4	4	4	260.55	1.71243	HLE	Huh7	Protein LYRIC OS=Homo sapiens GN=MTDH PE=1 SV=2 - [LYRIC_HUMAN]	2.39897e-05	9.06471e-06	MTDH
Q8IXT5	2	2	99.1	1.71243	HLE	Huh7	RNA-binding protein 12B OS=Homo sapiens GN=RBM12B PE=1 SV=2 - [RB12B_HUMAN]	0.00257273	0.00148014	RBM12B
P56537	6	6	536.15	1.7124	HLE	Huh7	Eukaryotic translation initiation factor 6 OS=Homo sapiens GN=EIF6 PE=1 SV=1 - [IF6_HUMAN]	4.47701e-05	1.7973e-05	EIF6
Q9H936	3	2	235.12	1.71179	HLE	Huh7	Mitochondrial glutamate carrier 1 OS=Homo sapiens GN=SLC25A22 PE=1 SV=1 - [GHC1_HUMAN]	8.89747e-06	3.04226e-06	SLC25A22
P18031	4	3	228.89	1.71123	HLE	Huh7	Tyrosine-protein phosphatase non-receptor type 1 OS=Homo sapiens GN=PTPN1 PE=1 SV=1 - [PTN1_HUMAN]	3.10212e-06	9.50339e-07	PTPN1
Q8N5K1	3	3	144.47	1.70996	HLE	Huh7	CDGSH iron-sulfur domain-containing protein 2 OS=Homo sapiens GN=CISD2 PE=1 SV=1 - [CISD2_HUMAN]	1.1422e-05	3.97179e-06	CISD2
P48723	2	2	58.31	1.70338	HLE	Huh7	Heat shock 70 kDa protein 13 OS=Homo sapiens GN=HSPA13 PE=1 SV=1 - [HSP13_HUMAN]	2.07869e-06	6.08894e-07	HSPA13
Q9Y3E5	4	4	214.22	1.7031	HLE	Huh7	Peptidyl-tRNA hydrolase 2, mitochondrial OS=Homo sapiens GN=PTRH2 PE=1 SV=1 - [PTH2_HUMAN]	7.16142e-07	1.86119e-07	PTRH2
P47756	9	9	595.2	1.7031	HLE	Huh7	F-actin-capping protein subunit beta OS=Homo sapiens GN=CAPZB PE=1 SV=4 - [CAPZB_HUMAN]	8.05893e-07	2.11199e-07	CAPZB
P35250	4	4	221.05	1.70077	HLE	Huh7	Replication factor C subunit 2 OS=Homo sapiens GN=RFC2 PE=1 SV=3 - [RFC2_HUMAN]	2.21956e-07	5.01112e-08	RFC2
Q14008	4	4	146.59	1.69974	HLE	Huh7	Cytoskeleton-associated protein 5 OS=Homo sapiens GN=CKAP5 PE=1 SV=3 - [CKAP5_HUMAN]	5.89601e-08	1.11072e-08	CKAP5
P08240	6	6	373.35	1.69932	HLE	Huh7	Signal recognition particle receptor subunit alpha OS=Homo sapiens GN=SRPR PE=1 SV=2 - [SRPR_HUMAN]	2.81284e-07	6.50375e-08	SRPR
P68032	20	2	1563.27	1.69923	HLE	Huh7	Actin, alpha cardiac muscle 1 OS=Homo sapiens GN=ACTC1 PE=1 SV=1 - [ACTC_HUMAN]	0.00458205	0.00278083	ACTC1
P50897	3	3	191.97	1.6981	HLE	Huh7	Palmitoyl-protein thioesterase 1 OS=Homo sapiens GN=PPT1 PE=1 SV=1 - [PPT1_HUMAN]	1.26262e-05	4.42718e-06	PPT1
Q14108	2	2	153.74	1.69742	HLE	Huh7	Lysosome membrane protein 2 OS=Homo sapiens GN=SCARB2 PE=1 SV=2 - [SCRB2_HUMAN]	0.00249741	0.00142595	SCARB2
P41208	3	3	163.39	1.69669	HLE	Huh7	Centrin-2 OS=Homo sapiens GN=CETN2 PE=1 SV=1 - [CETN2_HUMAN]	1.9351e-05	7.15717e-06	CETN2
O60749	4	4	217.18	1.69559	HLE	Huh7	Sorting nexin-2 OS=Homo sapiens GN=SNX2 PE=1 SV=2 - [SNX2_HUMAN]	9.82868e-05	4.17746e-05	SNX2
P00338	18	18	1371.63	1.69537	HLE	Huh7	L-lactate dehydrogenase A chain OS=Homo sapiens GN=LDHA PE=1 SV=2 - [LDHA_HUMAN]	9.67142e-07	2.59777e-07	LDHA
Q96KP4	6	6	269.97	1.69311	HLE	Huh7	Cytosolic non-specific dipeptidase OS=Homo sapiens GN=CNDP2 PE=1 SV=2 - [CNDP2_HUMAN]	8.91591e-08	1.75729e-08	CNDP2
P29992	3	2	120.69	1.684	HLE	Huh7	Guanine nucleotide-binding protein subunit alpha-11 OS=Homo sapiens GN=GNA11 PE=1 SV=2 - [GNA11_HUMAN]	0.000421236	0.000205649	GNA11
P00441	4	4	301.4	1.68391	HLE	Huh7	Superoxide dismutase [Cu-Zn] OS=Homo sapiens GN=SOD1 PE=1 SV=2 - [SODC_HUMAN]	0.000170476	7.64821e-05	SOD1
Q8N163	10	10	517.3	1.68103	HLE	Huh7	DBIRD complex subunit KIAA1967 OS=Homo sapiens GN=KIAA1967 PE=1 SV=2 - [K1967_HUMAN]	6.33597e-07	1.62366e-07	KIAA1967
Q9NX24	2	2	67.16	1.67415	HLE	Huh7	H/ACA ribonucleoprotein complex subunit 2 OS=Homo sapiens GN=NHP2 PE=1 SV=1 - [NHP2_HUMAN]	0.0157952	0.0105091	NHP2
Q15005	2	2	102.73	1.67376	HLE	Huh7	Signal peptidase complex subunit 2 OS=Homo sapiens GN=SPCS2 PE=1 SV=3 - [SPCS2_HUMAN]	3.10839e-05	1.20838e-05	SPCS2
O43399	4	4	184.04	1.67091	HLE	Huh7	Tumor protein D54 OS=Homo sapiens GN=TPD52L2 PE=1 SV=2 - [TPD54_HUMAN]	4.57106e-05	1.8417e-05	TPD52L2
P62879	8	5	571.97	1.66994	HLE	Huh7	Guanine nucleotide-binding protein G(I)/G(S)/G(T) subunit beta-2 OS=Homo sapiens GN=GNB2 PE=1 SV=3 - [GBB2_HUMAN]	1.7794e-05	6.49756e-06	GNB2
Q9H583	6	6	182.43	1.66913	HLE	Huh7	HEAT repeat-containing protein 1 OS=Homo sapiens GN=HEATR1 PE=1 SV=3 - [HEAT1_HUMAN]	0.000460289	0.000227054	HEATR1
P17480	2	2	73.72	1.66889	HLE	Huh7	Nucleolar transcription factor 1 OS=Homo sapiens GN=UBTF PE=1 SV=1 - [UBF1_HUMAN]	0.00266426	0.0015386	UBTF
Q9H910	3	3	164.91	1.66693	HLE	Huh7	Hematological and neurological expressed 1-like protein OS=Homo sapiens GN=HN1L PE=1 SV=1 - [HN1L_HUMAN]	5.57985e-05	2.27447e-05	HN1L
P67936	9	5	697.16	1.66613	HLE	Huh7	Tropomyosin alpha-4 chain OS=Homo sapiens GN=TPM4 PE=1 SV=3 - [TPM4_HUMAN]	1.00863e-06	2.71653e-07	TPM4
P12004	11	11	893.27	1.66578	HLE	Huh7	Proliferating cell nuclear antigen OS=Homo sapiens GN=PCNA PE=1 SV=1 - [PCNA_HUMAN]	2.2725e-05	8.52908e-06	PCNA
O15118	2	2	67.66	1.66253	HLE	Huh7	Niemann-Pick C1 protein OS=Homo sapiens GN=NPC1 PE=1 SV=2 - [NPC1_HUMAN]	0.00370356	0.00221676	NPC1
P01111	6	2	303.18	1.6573	HLE	Huh7	GTPase NRas OS=Homo sapiens GN=NRAS PE=1 SV=1 - [RASN_HUMAN]	6.36048e-06	2.0963e-06	NRAS
P11233	3	2	194.52	1.65444	HLE	Huh7	Ras-related protein Ral-A OS=Homo sapiens GN=RALA PE=1 SV=1 - [RALA_HUMAN]	0.00140422	0.000757925	RALA
Q9Y277	10	9	781.35	1.65307	HLE	Huh7	Voltage-dependent anion-selective channel protein 3 OS=Homo sapiens GN=VDAC3 PE=1 SV=1 - [VDAC3_HUMAN]	0.000136463	6.03308e-05	VDAC3
P38646	33	33	3212.86	1.65213	HLE	Huh7	Stress-70 protein, mitochondrial OS=Homo sapiens GN=HSPA9 PE=1 SV=2 - [GRP75_HUMAN]	5.78237e-06	1.89318e-06	HSPA9
Q13405	2	2	180.04	1.65004	HLE	Huh7	39S ribosomal protein L49, mitochondrial OS=Homo sapiens GN=MRPL49 PE=1 SV=1 - [RM49_HUMAN]	0.000178773	8.09183e-05	MRPL49
Q9BZE4	5	5	231.49	1.64784	HLE	Huh7	Nucleolar GTP-binding protein 1 OS=Homo sapiens GN=GTPBP4 PE=1 SV=3 - [NOG1_HUMAN]	0.000115452	5.01197e-05	GTPBP4
P62158	4	4	527.41	1.64178	HLE	Huh7	Calmodulin OS=Homo sapiens GN=CALM1 PE=1 SV=2 - [CALM_HUMAN]	0.0127521	0.00830392	CALM1
Q96CS3	7	7	405.81	1.63945	HLE	Huh7	FAS-associated factor 2 OS=Homo sapiens GN=FAF2 PE=1 SV=2 - [FAF2_HUMAN]	2.34401e-05	8.84002e-06	FAF2
Q15691	10	10	489.15	1.63615	HLE	Huh7	Microtubule-associated protein RP/EB family member 1 OS=Homo sapiens GN=MAPRE1 PE=1 SV=3 - [MARE1_HUMAN]	7.57757e-05	3.16305e-05	MAPRE1
Q8WWY3	2	2	80.4	1.63212	HLE	Huh7	U4/U6 small nuclear ribonucleoprotein Prp31 OS=Homo sapiens GN=PRPF31 PE=1 SV=2 - [PRP31_HUMAN]	0.00205606	0.0011493	PRPF31
Q9BUJ2	11	11	652.08	1.63108	HLE	Huh7	Heterogeneous nuclear ribonucleoprotein U-like protein 1 OS=Homo sapiens GN=HNRNPUL1 PE=1 SV=2 - [HNRL1_HUMAN]	5.67659e-09	7.45139e-10	HNRNPUL1
O15511	2	2	77.78	1.63057	HLE	Huh7	Actin-related protein 2/3 complex subunit 5 OS=Homo sapiens GN=ARPC5 PE=1 SV=3 - [ARPC5_HUMAN]	0.000237974	0.000110824	ARPC5
P36957	5	5	389.77	1.62746	HLE	Huh7	Dihydrolipoyllysine-residue succinyltransferase component of 2-oxoglutarate dehydrogenase complex, mitochondrial OS=Homo sapiens GN=DLST PE=1 SV=4 - [ODO2_HUMAN]	1.0144e-05	3.50531e-06	DLST
P13473	3	3	225.36	1.62493	HLE	Huh7	Lysosome-associated membrane glycoprotein 2 OS=Homo sapiens GN=LAMP2 PE=1 SV=2 - [LAMP2_HUMAN]	0.00262193	0.00151092	LAMP2
Q9UNZ2	7	7	775.2	1.62069	HLE	Huh7	NSFL1 cofactor p47 OS=Homo sapiens GN=NSFL1C PE=1 SV=2 - [NSF1C_HUMAN]	5.89351e-05	2.41302e-05	NSFL1C
Q13162	9	7	820.74	1.61854	HLE	Huh7	Peroxiredoxin-4 OS=Homo sapiens GN=PRDX4 PE=1 SV=1 - [PRDX4_HUMAN]	3.5037e-05	1.37096e-05	PRDX4
Q07157	3	3	166.55	1.6182	HLE	Huh7	Tight junction protein ZO-1 OS=Homo sapiens GN=TJP1 PE=1 SV=3 - [ZO1_HUMAN]	1.45344e-06	4.07043e-07	TJP1
Q9Y697	2	2	185.02	1.61722	HLE	Huh7	Cysteine desulfurase, mitochondrial OS=Homo sapiens GN=NFS1 PE=1 SV=3 - [NFS1_HUMAN]	4.27061e-06	1.34861e-06	NFS1
O00217	3	3	168.1	1.61643	HLE	Huh7	NADH dehydrogenase [ubiquinone] iron-sulfur protein 8, mitochondrial OS=Homo sapiens GN=NDUFS8 PE=1 SV=1 - [NDUS8_HUMAN]	9.17986e-06	3.14881e-06	NDUFS8
Q9NYH9	2	2	95.77	1.61319	HLE	Huh7	U3 small nucleolar RNA-associated protein 6 homolog OS=Homo sapiens GN=UTP6 PE=1 SV=2 - [UTP6_HUMAN]	0.000670559	0.000340026	UTP6
Q05048	4	4	179.89	1.61152	HLE	Huh7	Cleavage stimulation factor subunit 1 OS=Homo sapiens GN=CSTF1 PE=1 SV=1 - [CSTF1_HUMAN]	1.21463e-05	4.2501e-06	CSTF1
P31930	12	12	810.05	1.60841	HLE	Huh7	Cytochrome b-c1 complex subunit 1, mitochondrial OS=Homo sapiens GN=UQCRC1 PE=1 SV=3 - [QCR1_HUMAN]	1.05929e-06	2.8722e-07	UQCRC1
O00429	7	7	437.9	1.60493	HLE	Huh7	Dynamin-1-like protein OS=Homo sapiens GN=DNM1L PE=1 SV=2 - [DNM1L_HUMAN]	8.3991e-06	2.85051e-06	DNM1L
P33240	3	3	161.02	1.6002	HLE	Huh7	Cleavage stimulation factor subunit 2 OS=Homo sapiens GN=CSTF2 PE=1 SV=1 - [CSTF2_HUMAN]	5.14545e-06	1.66597e-06	CSTF2
P06865	2	2	105.86	1.59839	HLE	Huh7	Beta-hexosaminidase subunit alpha OS=Homo sapiens GN=HEXA PE=1 SV=2 - [HEXA_HUMAN]	5.70099e-07	1.44439e-07	HEXA
Q96K17	2	2	87.67	1.59706	HLE	Huh7	Transcription factor BTF3 homolog 4 OS=Homo sapiens GN=BTF3L4 PE=1 SV=1 - [BT3L4_HUMAN]	6.33916e-05	2.6093e-05	BTF3L4
O95777	4	4	337.65	1.59485	HLE	Huh7	N-alpha-acetyltransferase 38, NatC auxiliary subunit OS=Homo sapiens GN=NAA38 PE=1 SV=3 - [NAA38_HUMAN]	6.67628e-06	2.21493e-06	NAA38
P31040	9	9	630.88	1.59349	HLE	Huh7	Succinate dehydrogenase [ubiquinone] flavoprotein subunit, mitochondrial OS=Homo sapiens GN=SDHA PE=1 SV=2 - [DHSA_HUMAN]	2.15144e-05	8.0513e-06	SDHA
Q3ZCQ8	3	3	160.83	1.59222	HLE	Huh7	Mitochondrial import inner membrane translocase subunit TIM50 OS=Homo sapiens GN=TIMM50 PE=1 SV=2 - [TIM50_HUMAN]	0.00019608	8.95348e-05	TIMM50
Q14019	4	4	284.36	1.58985	HLE	Huh7	Coactosin-like protein OS=Homo sapiens GN=COTL1 PE=1 SV=3 - [COTL1_HUMAN]	0.00100403	0.000527709	COTL1
O76094	2	2	163.11	1.58917	HLE	Huh7	Signal recognition particle 72 kDa protein OS=Homo sapiens GN=SRP72 PE=1 SV=3 - [SRP72_HUMAN]	0.000226049	0.000104541	SRP72
P62873	6	3	513.04	1.5843	HLE	Huh7	Guanine nucleotide-binding protein G(I)/G(S)/G(T) subunit beta-1 OS=Homo sapiens GN=GNB1 PE=1 SV=3 - [GBB1_HUMAN]	1.00117e-05	3.44869e-06	GNB1
P42224	9	9	435.02	1.56965	HLE	Huh7	Signal transducer and activator of transcription 1-alpha/beta OS=Homo sapiens GN=STAT1 PE=1 SV=2 - [STAT1_HUMAN]	4.51317e-05	1.8151e-05	STAT1
P55263	3	3	76.31	1.56962	HLE	Huh7	Adenosine kinase OS=Homo sapiens GN=ADK PE=1 SV=2 - [ADK_HUMAN]	9.31349e-07	2.4881e-07	ADK
O43488	2	2	140.08	1.56846	HLE	Huh7	Aflatoxin B1 aldehyde reductase member 2 OS=Homo sapiens GN=AKR7A2 PE=1 SV=3 - [ARK72_HUMAN]	0.000124526	5.45562e-05	AKR7A2
P27708	15	15	786.26	1.56319	HLE	Huh7	CAD protein OS=Homo sapiens GN=CAD PE=1 SV=3 - [PYR1_HUMAN]	7.34815e-07	1.91505e-07	CAD
Q86TX2	3	3	175.23	1.56253	HLE	Huh7	Acyl-coenzyme A thioesterase 1 OS=Homo sapiens GN=ACOT1 PE=1 SV=1 - [ACOT1_HUMAN]	0.000108653	4.67742e-05	ACOT1
Q8TCS8	3	3	119.09	1.56091	HLE	Huh7	Polyribonucleotide nucleotidyltransferase 1, mitochondrial OS=Homo sapiens GN=PNPT1 PE=1 SV=2 - [PNPT1_HUMAN]	0.000150522	6.68743e-05	PNPT1
O75340	3	3	157.97	1.55216	HLE	Huh7	Programmed cell death protein 6 OS=Homo sapiens GN=PDCD6 PE=1 SV=1 - [PDCD6_HUMAN]	1.33023e-05	4.69805e-06	PDCD6
O00139	2	2	111.89	1.54996	HLE	Huh7	Kinesin-like protein KIF2A OS=Homo sapiens GN=KIF2A PE=1 SV=3 - [KIF2A_HUMAN]	2.89402e-05	1.11559e-05	KIF2A
Q15050	2	2	141.75	1.54975	HLE	Huh7	Ribosome biogenesis regulatory protein homolog OS=Homo sapiens GN=RRS1 PE=1 SV=2 - [RRS1_HUMAN]	0.000173829	7.82387e-05	RRS1
O15143	6	5	292.07	1.54774	HLE	Huh7	Actin-related protein 2/3 complex subunit 1B OS=Homo sapiens GN=ARPC1B PE=1 SV=3 - [ARC1B_HUMAN]	0.000315203	0.000149764	ARPC1B
P54920	4	4	199.16	1.54488	HLE	Huh7	Alpha-soluble NSF attachment protein OS=Homo sapiens GN=NAPA PE=1 SV=3 - [SNAA_HUMAN]	8.26603e-06	2.79035e-06	NAPA
P61221	10	10	496.32	1.54188	HLE	Huh7	ATP-binding cassette sub-family E member 1 OS=Homo sapiens GN=ABCE1 PE=1 SV=1 - [ABCE1_HUMAN]	2.70433e-07	6.22339e-08	ABCE1
P35249	4	4	191.77	1.54177	HLE	Huh7	Replication factor C subunit 4 OS=Homo sapiens GN=RFC4 PE=1 SV=2 - [RFC4_HUMAN]	0.000116827	5.07592e-05	RFC4
Q8NBJ5	5	5	276.27	1.53972	HLE	Huh7	Procollagen galactosyltransferase 1 OS=Homo sapiens GN=GLT25D1 PE=1 SV=1 - [GT251_HUMAN]	1.81262e-05	6.64029e-06	GLT25D1
Q15075	9	9	576.14	1.53826	HLE	Huh7	Early endosome antigen 1 OS=Homo sapiens GN=EEA1 PE=1 SV=2 - [EEA1_HUMAN]	3.47781e-05	1.35956e-05	EEA1
O95373	6	5	401.75	1.53708	HLE	Huh7	Importin-7 OS=Homo sapiens GN=IPO7 PE=1 SV=1 - [IPO7_HUMAN]	0.000100466	4.28847e-05	IPO7
Q9BYD1	2	2	114.26	1.53692	HLE	Huh7	39S ribosomal protein L13, mitochondrial OS=Homo sapiens GN=MRPL13 PE=1 SV=1 - [RM13_HUMAN]	2.84644e-06	8.62714e-07	MRPL13
P46087	8	8	447.3	1.53514	HLE	Huh7	Putative ribosomal RNA methyltransferase NOP2 OS=Homo sapiens GN=NOP2 PE=1 SV=2 - [NOP2_HUMAN]	3.04411e-05	1.18007e-05	NOP2
P26583	5	3	329.1	1.53433	HLE	Huh7	High mobility group protein B2 OS=Homo sapiens GN=HMGB2 PE=1 SV=2 - [HMGB2_HUMAN]	0.000187266	8.52385e-05	HMGB2
Q68CZ2	2	2	46.95	1.53014	HLE	Huh7	Tensin-3 OS=Homo sapiens GN=TNS3 PE=1 SV=2 - [TENS3_HUMAN]	0.00115483	0.00061493	TNS3
Q00610	64	64	4929.2	1.52705	HLE	Huh7	Clathrin heavy chain 1 OS=Homo sapiens GN=CLTC PE=1 SV=5 - [CLH1_HUMAN]	2.13018e-06	6.26296e-07	CLTC
P00558	19	19	1829.48	1.52565	HLE	Huh7	Phosphoglycerate kinase 1 OS=Homo sapiens GN=PGK1 PE=1 SV=3 - [PGK1_HUMAN]	8.66593e-06	2.94736e-06	PGK1
Q14160	2	2	70.73	1.52447	HLE	Huh7	Protein scribble homolog OS=Homo sapiens GN=SCRIB PE=1 SV=4 - [SCRIB_HUMAN]	0.00100535	0.000529497	SCRIB
P11717	4	4	151.84	1.52175	HLE	Huh7	Cation-independent mannose-6-phosphate receptor OS=Homo sapiens GN=IGF2R PE=1 SV=3 - [MPRI_HUMAN]	0.000469899	0.000232647	IGF2R
Q9H0S4	4	4	289.79	1.52108	HLE	Huh7	Probable ATP-dependent RNA helicase DDX47 OS=Homo sapiens GN=DDX47 PE=1 SV=1 - [DDX47_HUMAN]	0.00278901	0.00162076	DDX47
O60832	3	3	179.76	1.52014	HLE	Huh7	H/ACA ribonucleoprotein complex subunit 4 OS=Homo sapiens GN=DKC1 PE=1 SV=3 - [DKC1_HUMAN]	0.000173891	7.83928e-05	DKC1
P40937	3	3	144.73	1.5195	HLE	Huh7	Replication factor C subunit 5 OS=Homo sapiens GN=RFC5 PE=1 SV=1 - [RFC5_HUMAN]	0.00021123	9.70661e-05	RFC5
P31948	15	15	1106.37	1.51272	HLE	Huh7	Stress-induced-phosphoprotein 1 OS=Homo sapiens GN=STIP1 PE=1 SV=1 - [STIP1_HUMAN]	4.39339e-05	1.76054e-05	STIP1
P06733	36	35	4244.84	1.51213	HLE	Huh7	Alpha-enolase OS=Homo sapiens GN=ENO1 PE=1 SV=2 - [ENOA_HUMAN]	1.4248e-05	5.07861e-06	ENO1
Q92979	6	6	300.36	1.5111	HLE	Huh7	Ribosomal RNA small subunit methyltransferase NEP1 OS=Homo sapiens GN=EMG1 PE=1 SV=4 - [NEP1_HUMAN]	0.000154507	6.87008e-05	EMG1
Q14690	2	2	89.84	1.50853	HLE	Huh7	Protein RRP5 homolog OS=Homo sapiens GN=PDCD11 PE=1 SV=3 - [RRP5_HUMAN]	0.00164868	0.000902434	PDCD11
P28066	5	4	484.34	1.50833	HLE	Huh7	Proteasome subunit alpha type-5 OS=Homo sapiens GN=PSMA5 PE=1 SV=3 - [PSA5_HUMAN]	0.000215312	9.9098e-05	PSMA5
P42167	18	8	1462.05	1.50513	HLE	Huh7	Lamina-associated polypeptide 2, isoforms beta/gamma OS=Homo sapiens GN=TMPO PE=1 SV=2 - [LAP2B_HUMAN]	0.0226153	0.0155639	TMPO
Q9Y2W1	7	7	520.67	1.50241	HLE	Huh7	Thyroid hormone receptor-associated protein 3 OS=Homo sapiens GN=THRAP3 PE=1 SV=2 - [TR150_HUMAN]	0.000504954	0.000250736	THRAP3
Q7Z6Z7	13	12	684.3	1.50147	HLE	Huh7	E3 ubiquitin-protein ligase HUWE1 OS=Homo sapiens GN=HUWE1 PE=1 SV=3 - [HUWE1_HUMAN]	1.05073e-07	2.14722e-08	HUWE1
O94906	6	6	326.97	1.49965	HLE	Huh7	Pre-mRNA-processing factor 6 OS=Homo sapiens GN=PRPF6 PE=1 SV=1 - [PRP6_HUMAN]	3.57776e-05	1.40903e-05	PRPF6
O43660	3	3	112.29	1.49541	HLE	Huh7	Pleiotropic regulator 1 OS=Homo sapiens GN=PLRG1 PE=1 SV=1 - [PLRG1_HUMAN]	0.00144468	0.00078081	PLRG1
P19784	2	2	61.03	1.49469	HLE	Huh7	Casein kinase II subunit alpha' OS=Homo sapiens GN=CSNK2A2 PE=1 SV=1 - [CSK22_HUMAN]	0.000896703	0.00046609	CSNK2A2
P36542	6	6	389.25	1.49016	HLE	Huh7	ATP synthase subunit gamma, mitochondrial OS=Homo sapiens GN=ATP5C1 PE=1 SV=1 - [ATPG_HUMAN]	0.00104956	0.000555827	ATP5C1
Q14165	2	2	111.9	1.4863	HLE	Huh7	Malectin OS=Homo sapiens GN=MLEC PE=1 SV=1 - [MLEC_HUMAN]	2.94531e-05	1.13857e-05	MLEC
Q16643	8	8	612	1.48388	HLE	Huh7	Drebrin OS=Homo sapiens GN=DBN1 PE=1 SV=4 - [DREB_HUMAN]	0.00175269	0.000964455	DBN1
P41227	2	2	57.09	1.48362	HLE	Huh7	N-alpha-acetyltransferase 10 OS=Homo sapiens GN=NAA10 PE=1 SV=1 - [NAA10_HUMAN]	0.000381065	0.000184729	NAA10
O75369	57	52	3932.47	1.48296	HLE	Huh7	Filamin-B OS=Homo sapiens GN=FLNB PE=1 SV=2 - [FLNB_HUMAN]	1.50321e-05	5.36899e-06	FLNB
Q9H061	2	2	47.17	1.47908	HLE	Huh7	Transmembrane protein 126A OS=Homo sapiens GN=TMEM126A PE=1 SV=1 - [T126A_HUMAN]	0.0192897	0.0130722	TMEM126A
Q8N766	12	12	722.16	1.47692	HLE	Huh7	ER membrane protein complex subunit 1 OS=Homo sapiens GN=EMC1 PE=1 SV=1 - [EMC1_HUMAN]	5.24213e-06	1.69917e-06	EMC1
Q969X5	2	2	97.79	1.47587	HLE	Huh7	Endoplasmic reticulum-Golgi intermediate compartment protein 1 OS=Homo sapiens GN=ERGIC1 PE=1 SV=1 - [ERGI1_HUMAN]	0.000338332	0.000161736	ERGIC1
P10606	2	2	148.22	1.4714	HLE	Huh7	Cytochrome c oxidase subunit 5B, mitochondrial OS=Homo sapiens GN=COX5B PE=1 SV=2 - [COX5B_HUMAN]	0.000804777	0.000413635	COX5B
O43719	2	2	54.22	1.47133	HLE	Huh7	HIV Tat-specific factor 1 OS=Homo sapiens GN=HTATSF1 PE=1 SV=1 - [HTSF1_HUMAN]	0.000237974	0.000110818	HTATSF1
Q15428	3	3	88.61	1.4689	HLE	Huh7	Splicing factor 3A subunit 2 OS=Homo sapiens GN=SF3A2 PE=1 SV=2 - [SF3A2_HUMAN]	0.0162705	0.0108608	SF3A2
Q15427	3	3	186.17	1.46251	HLE	Huh7	Splicing factor 3B subunit 4 OS=Homo sapiens GN=SF3B4 PE=1 SV=1 - [SF3B4_HUMAN]	0.000168049	7.51491e-05	SF3B4
Q9ULV4	9	9	427.6	1.46066	HLE	Huh7	Coronin-1C OS=Homo sapiens GN=CORO1C PE=1 SV=1 - [COR1C_HUMAN]	1.31523e-05	4.63076e-06	CORO1C
P35221	13	13	692.68	1.4597	HLE	Huh7	Catenin alpha-1 OS=Homo sapiens GN=CTNNA1 PE=1 SV=1 - [CTNA1_HUMAN]	1.23137e-07	2.56555e-08	CTNNA1
Q8N7H5	4	4	205.64	1.45698	HLE	Huh7	RNA polymerase II-associated factor 1 homolog OS=Homo sapiens GN=PAF1 PE=1 SV=2 - [PAF1_HUMAN]	4.33386e-07	1.06183e-07	PAF1
P07339	15	15	827.45	1.45623	HLE	Huh7	Cathepsin D OS=Homo sapiens GN=CTSD PE=1 SV=1 - [CATD_HUMAN]	0.000105545	4.52444e-05	CTSD
O60313	2	2	81.73	1.45606	HLE	Huh7	Dynamin-like 120 kDa protein, mitochondrial OS=Homo sapiens GN=OPA1 PE=1 SV=3 - [OPA1_HUMAN]	0.0004029	0.00019582	OPA1
Q7Z7F7	2	2	106.02	1.45397	HLE	Huh7	39S ribosomal protein L55, mitochondrial OS=Homo sapiens GN=MRPL55 PE=1 SV=1 - [RM55_HUMAN]	0.00216544	0.00121437	MRPL55
P00505	13	13	1026.58	1.45215	HLE	Huh7	Aspartate aminotransferase, mitochondrial OS=Homo sapiens GN=GOT2 PE=1 SV=3 - [AATM_HUMAN]	1.66017e-05	6.01398e-06	GOT2
Q9UGP8	6	6	297.29	1.45112	HLE	Huh7	Translocation protein SEC63 homolog OS=Homo sapiens GN=SEC63 PE=1 SV=2 - [SEC63_HUMAN]	1.35182e-05	4.78903e-06	SEC63
Q99729	8	7	383.06	1.4496	HLE	Huh7	Heterogeneous nuclear ribonucleoprotein A/B OS=Homo sapiens GN=HNRNPAB PE=1 SV=2 - [ROAA_HUMAN]	0.00756564	0.00475633	HNRNPAB
O75489	8	8	425.37	1.4484	HLE	Huh7	NADH dehydrogenase [ubiquinone] iron-sulfur protein 3, mitochondrial OS=Homo sapiens GN=NDUFS3 PE=1 SV=1 - [NDUS3_HUMAN]	8.85248e-05	3.74343e-05	NDUFS3
P68402	2	2	166.42	1.44652	HLE	Huh7	Platelet-activating factor acetylhydrolase IB subunit beta OS=Homo sapiens GN=PAFAH1B2 PE=1 SV=1 - [PA1B2_HUMAN]	0.000250058	0.000117087	PAFAH1B2
P16152	7	7	480.57	1.44496	HLE	Huh7	Carbonyl reductase [NADPH] 1 OS=Homo sapiens GN=CBR1 PE=1 SV=3 - [CBR1_HUMAN]	1.56837e-06	4.44039e-07	CBR1
Q9H488	4	4	187.88	1.4449	HLE	Huh7	GDP-fucose protein O-fucosyltransferase 1 OS=Homo sapiens GN=POFUT1 PE=1 SV=1 - [OFUT1_HUMAN]	3.94187e-05	1.57103e-05	POFUT1
P17812	9	9	465.02	1.44305	HLE	Huh7	CTP synthase 1 OS=Homo sapiens GN=CTPS1 PE=1 SV=2 - [PYRG1_HUMAN]	3.03281e-08	5.24e-09	CTPS1
P11413	8	8	489.9	1.44173	HLE	Huh7	Glucose-6-phosphate 1-dehydrogenase OS=Homo sapiens GN=G6PD PE=1 SV=4 - [G6PD_HUMAN]	1.9351e-05	7.15983e-06	G6PD
Q9UKF6	2	2	61.46	1.44161	HLE	Huh7	Cleavage and polyadenylation specificity factor subunit 3 OS=Homo sapiens GN=CPSF3 PE=1 SV=1 - [CPSF3_HUMAN]	0.000938718	0.000490995	CPSF3
P47985	5	5	275.61	1.44017	HLE	Huh7	Cytochrome b-c1 complex subunit Rieske, mitochondrial OS=Homo sapiens GN=UQCRFS1 PE=1 SV=2 - [UCRI_HUMAN]	3.93968e-05	1.56872e-05	UQCRFS1
P61758	2	2	79.32	1.43788	HLE	Huh7	Prefoldin subunit 3 OS=Homo sapiens GN=VBP1 PE=1 SV=3 - [PFD3_HUMAN]	0.00199634	0.00110867	VBP1
Q9UHG3	6	6	352.16	1.43566	HLE	Huh7	Prenylcysteine oxidase 1 OS=Homo sapiens GN=PCYOX1 PE=1 SV=3 - [PCYOX_HUMAN]	0.00132769	0.000715098	PCYOX1
O60568	5	5	368.66	1.43477	HLE	Huh7	Procollagen-lysine,2-oxoglutarate 5-dioxygenase 3 OS=Homo sapiens GN=PLOD3 PE=1 SV=1 - [PLOD3_HUMAN]	5.68835e-05	2.32283e-05	PLOD3
P10253	7	7	348.1	1.43469	HLE	Huh7	Lysosomal alpha-glucosidase OS=Homo sapiens GN=GAA PE=1 SV=4 - [LYAG_HUMAN]	0.000480953	0.000238294	GAA
P51610	6	6	302.23	1.43425	HLE	Huh7	Host cell factor 1 OS=Homo sapiens GN=HCFC1 PE=1 SV=2 - [HCFC1_HUMAN]	8.68473e-05	3.65988e-05	HCFC1
O75934	2	2	123.6	1.43291	HLE	Huh7	Pre-mRNA-splicing factor SPF27 OS=Homo sapiens GN=BCAS2 PE=1 SV=1 - [SPF27_HUMAN]	0.00154458	0.000841527	BCAS2
P83916	7	5	449.65	1.4319	HLE	Huh7	Chromobox protein homolog 1 OS=Homo sapiens GN=CBX1 PE=1 SV=1 - [CBX1_HUMAN]	0.00895049	0.00570168	CBX1
P42285	8	8	478.37	1.43023	HLE	Huh7	Superkiller viralicidic activity 2-like 2 OS=Homo sapiens GN=SKIV2L2 PE=1 SV=3 - [SK2L2_HUMAN]	0.000201201	9.21653e-05	SKIV2L2
P56134	3	2	186.1	1.42687	HLE	Huh7	ATP synthase subunit f, mitochondrial OS=Homo sapiens GN=ATP5J2 PE=1 SV=3 - [ATPK_HUMAN]	0.00154208	0.00083961	ATP5J2
P00403	4	4	186.12	1.42634	HLE	Huh7	Cytochrome c oxidase subunit 2 OS=Homo sapiens GN=MT-CO2 PE=1 SV=1 - [COX2_HUMAN]	0.00142708	0.000770778	MT-CO2
Q6P1J9	3	3	120.07	1.42571	HLE	Huh7	Parafibromin OS=Homo sapiens GN=CDC73 PE=1 SV=1 - [CDC73_HUMAN]	0.000786189	0.000402084	CDC73
Q9Y512	3	3	111.28	1.42197	HLE	Huh7	Sorting and assembly machinery component 50 homolog OS=Homo sapiens GN=SAMM50 PE=1 SV=3 - [SAM50_HUMAN]	0.00089678	0.00046688	SAMM50
P51452	4	4	469.57	1.42089	HLE	Huh7	Dual specificity protein phosphatase 3 OS=Homo sapiens GN=DUSP3 PE=1 SV=1 - [DUS3_HUMAN]	2.50755e-05	9.5478e-06	DUSP3
Q02880	5	2	164	1.41983	HLE	Huh7	DNA topoisomerase 2-beta OS=Homo sapiens GN=TOP2B PE=1 SV=3 - [TOP2B_HUMAN]	0.0457934	0.0333103	TOP2B
Q9HD45	3	3	186.17	1.41796	HLE	Huh7	Transmembrane 9 superfamily member 3 OS=Homo sapiens GN=TM9SF3 PE=1 SV=2 - [TM9S3_HUMAN]	0.00531796	0.00325447	TM9SF3
O75347	2	2	122.48	1.4179	HLE	Huh7	Tubulin-specific chaperone A OS=Homo sapiens GN=TBCA PE=1 SV=3 - [TBCA_HUMAN]	0.00227965	0.00128293	TBCA
Q9Y5Y2	2	2	94.89	1.4172	HLE	Huh7	Cytosolic Fe-S cluster assembly factor NUBP2 OS=Homo sapiens GN=NUBP2 PE=1 SV=1 - [NUBP2_HUMAN]	0.00255627	0.00146894	NUBP2
Q9UKD2	3	3	107.62	1.41704	HLE	Huh7	mRNA turnover protein 4 homolog OS=Homo sapiens GN=MRTO4 PE=1 SV=2 - [MRT4_HUMAN]	0.000281671	0.000133219	MRTO4
Q9UHB9	5	5	276.1	1.41676	HLE	Huh7	Signal recognition particle 68 kDa protein OS=Homo sapiens GN=SRP68 PE=1 SV=2 - [SRP68_HUMAN]	7.08407e-05	2.94162e-05	SRP68
P12270	14	14	894.61	1.41636	HLE	Huh7	Nucleoprotein TPR OS=Homo sapiens GN=TPR PE=1 SV=3 - [TPR_HUMAN]	7.75986e-06	2.61103e-06	TPR
Q9UQE7	9	8	375.23	1.41524	HLE	Huh7	Structural maintenance of chromosomes protein 3 OS=Homo sapiens GN=SMC3 PE=1 SV=2 - [SMC3_HUMAN]	0.000763672	0.000390013	SMC3
Q8IXM3	2	2	75.24	1.41335	HLE	Huh7	39S ribosomal protein L41, mitochondrial OS=Homo sapiens GN=MRPL41 PE=1 SV=1 - [RM41_HUMAN]	4.24202e-05	1.69527e-05	MRPL41
O95202	7	7	385.86	1.41256	HLE	Huh7	LETM1 and EF-hand domain-containing protein 1, mitochondrial OS=Homo sapiens GN=LETM1 PE=1 SV=1 - [LETM1_HUMAN]	0.00154185	0.000838923	LETM1
P30040	10	10	574.52	1.41158	HLE	Huh7	Endoplasmic reticulum resident protein 29 OS=Homo sapiens GN=ERP29 PE=1 SV=4 - [ERP29_HUMAN]	0.000900881	0.00046957	ERP29
Q04917	8	5	388.93	1.41149	HLE	Huh7	14-3-3 protein eta OS=Homo sapiens GN=YWHAH PE=1 SV=4 - [1433F_HUMAN]	0.00100942	0.000532741	YWHAH
O96000	2	2	83.31	1.41143	HLE	Huh7	NADH dehydrogenase [ubiquinone] 1 beta subcomplex subunit 10 OS=Homo sapiens GN=NDUFB10 PE=1 SV=3 - [NDUBA_HUMAN]	0.00153826	0.000835854	NDUFB10
O60684	5	4	349.35	1.40969	HLE	Huh7	Importin subunit alpha-7 OS=Homo sapiens GN=KPNA6 PE=1 SV=1 - [IMA7_HUMAN]	1.69687e-05	6.15923e-06	KPNA6
Q9NRG9	3	3	110.56	1.40904	HLE	Huh7	Aladin OS=Homo sapiens GN=AAAS PE=1 SV=1 - [AAAS_HUMAN]	0.00659189	0.00410587	AAAS
Q12824	2	2	56.38	1.40663	HLE	Huh7	SWI/SNF-related matrix-associated actin-dependent regulator of chromatin subfamily B member 1 OS=Homo sapiens GN=SMARCB1 PE=1 SV=2 - [SNF5_HUMAN]	0.000441398	0.000216516	SMARCB1
Q13573	3	3	173.54	1.40578	HLE	Huh7	SNW domain-containing protein 1 OS=Homo sapiens GN=SNW1 PE=1 SV=1 - [SNW1_HUMAN]	0.0100383	0.00646024	SNW1
O15355	2	2	66.05	1.4038	HLE	Huh7	Protein phosphatase 1G OS=Homo sapiens GN=PPM1G PE=1 SV=1 - [PPM1G_HUMAN]	0.00366116	0.00218739	PPM1G
P22314	31	31	2658.6	1.40046	HLE	Huh7	Ubiquitin-like modifier-activating enzyme 1 OS=Homo sapiens GN=UBA1 PE=1 SV=3 - [UBA1_HUMAN]	0.000123709	5.40639e-05	UBA1
P47755	6	5	346.17	1.39998	HLE	Huh7	F-actin-capping protein subunit alpha-2 OS=Homo sapiens GN=CAPZA2 PE=1 SV=3 - [CAZA2_HUMAN]	5.47471e-05	2.2259e-05	CAPZA2
Q9Y2W2	2	2	99.56	1.39801	HLE	Huh7	WW domain-binding protein 11 OS=Homo sapiens GN=WBP11 PE=1 SV=1 - [WBP11_HUMAN]	0.00084476	0.000436332	WBP11
Q9Y221	2	2	79.48	1.39515	HLE	Huh7	60S ribosome subunit biogenesis protein NIP7 homolog OS=Homo sapiens GN=NIP7 PE=1 SV=1 - [NIP7_HUMAN]	0.000731011	0.000372006	NIP7
Q8IY81	7	7	403.1	1.39488	HLE	Huh7	pre-rRNA processing protein FTSJ3 OS=Homo sapiens GN=FTSJ3 PE=1 SV=2 - [RRMJ3_HUMAN]	0.000175872	7.95239e-05	FTSJ3
P14854	2	2	176.57	1.39431	HLE	Huh7	Cytochrome c oxidase subunit 6B1 OS=Homo sapiens GN=COX6B1 PE=1 SV=2 - [CX6B1_HUMAN]	0.000133511	5.88803e-05	COX6B1
O60271	2	2	75.8	1.39388	HLE	Huh7	C-Jun-amino-terminal kinase-interacting protein 4 OS=Homo sapiens GN=SPAG9 PE=1 SV=4 - [JIP4_HUMAN]	7.35486e-05	3.06208e-05	SPAG9
Q9H9B4	6	4	330.9	1.39365	HLE	Huh7	Sideroflexin-1 OS=Homo sapiens GN=SFXN1 PE=1 SV=4 - [SFXN1_HUMAN]	0.000411642	0.000200218	SFXN1
Q8N1F7	7	7	414.52	1.39278	HLE	Huh7	Nuclear pore complex protein Nup93 OS=Homo sapiens GN=NUP93 PE=1 SV=2 - [NUP93_HUMAN]	0.00262193	0.00151187	NUP93
P41743	2	2	120.9	1.39127	HLE	Huh7	Protein kinase C iota type OS=Homo sapiens GN=PRKCI PE=1 SV=2 - [KPCI_HUMAN]	0.00305684	0.00179083	PRKCI
P28070	7	7	448.62	1.3893	HLE	Huh7	Proteasome subunit beta type-4 OS=Homo sapiens GN=PSMB4 PE=1 SV=4 - [PSB4_HUMAN]	0.00111518	0.000592201	PSMB4
P35244	3	3	93.86	1.38918	HLE	Huh7	Replication protein A 14 kDa subunit OS=Homo sapiens GN=RPA3 PE=1 SV=1 - [RFA3_HUMAN]	0.00362705	0.00216306	RPA3
P54105	2	2	107.72	1.38794	HLE	Huh7	Methylosome subunit pICln OS=Homo sapiens GN=CLNS1A PE=1 SV=1 - [ICLN_HUMAN]	0.000823133	0.000423966	CLNS1A
P10768	6	6	420.18	1.38591	HLE	Huh7	S-formylglutathione hydrolase OS=Homo sapiens GN=ESD PE=1 SV=2 - [ESTD_HUMAN]	0.000825805	0.000425942	ESD
P38159	8	8	706.76	1.38417	HLE	Huh7	RNA-binding motif protein, X chromosome OS=Homo sapiens GN=RBMX PE=1 SV=3 - [RBMX_HUMAN]	0.00237578	0.00134786	RBMX
P13861	7	7	358.28	1.38404	HLE	Huh7	cAMP-dependent protein kinase type II-alpha regulatory subunit OS=Homo sapiens GN=PRKAR2A PE=1 SV=2 - [KAP2_HUMAN]	0.00104344	0.000551832	PRKAR2A
O94874	4	4	180.89	1.3816	HLE	Huh7	E3 UFM1-protein ligase 1 OS=Homo sapiens GN=UFL1 PE=1 SV=2 - [UFL1_HUMAN]	0.000167724	7.49433e-05	UFL1
O75475	3	3	170.4	1.37961	HLE	Huh7	PC4 and SFRS1-interacting protein OS=Homo sapiens GN=PSIP1 PE=1 SV=1 - [PSIP1_HUMAN]	0.00144907	0.00078371	PSIP1
Q16186	3	3	128.43	1.37928	HLE	Huh7	Proteasomal ubiquitin receptor ADRM1 OS=Homo sapiens GN=ADRM1 PE=1 SV=2 - [ADRM1_HUMAN]	0.00112276	0.000596633	ADRM1
Q9BXJ9	10	10	494.33	1.37923	HLE	Huh7	N-alpha-acetyltransferase 15, NatA auxiliary subunit OS=Homo sapiens GN=NAA15 PE=1 SV=1 - [NAA15_HUMAN]	1.16985e-06	3.21867e-07	NAA15
Q9NX62	2	2	141.56	1.37896	HLE	Huh7	Inositol monophosphatase 3 OS=Homo sapiens GN=IMPAD1 PE=1 SV=1 - [IMPA3_HUMAN]	0.0215102	0.0147331	IMPAD1
Q9H3N1	2	2	97.72	1.37801	HLE	Huh7	Thioredoxin-related transmembrane protein 1 OS=Homo sapiens GN=TMX1 PE=1 SV=1 - [TMX1_HUMAN]	0.00320037	0.00188305	TMX1
Q9Y4W6	4	4	323.49	1.37507	HLE	Huh7	AFG3-like protein 2 OS=Homo sapiens GN=AFG3L2 PE=1 SV=2 - [AFG32_HUMAN]	0.0014685	0.000795284	AFG3L2
P11310	6	6	328.38	1.37425	HLE	Huh7	Medium-chain specific acyl-CoA dehydrogenase, mitochondrial OS=Homo sapiens GN=ACADM PE=1 SV=1 - [ACADM_HUMAN]	0.00215811	0.00120948	ACADM
Q99733	8	6	656.76	1.37201	HLE	Huh7	Nucleosome assembly protein 1-like 4 OS=Homo sapiens GN=NAP1L4 PE=1 SV=1 - [NP1L4_HUMAN]	0.000460181	0.000226833	NAP1L4
O95716	5	2	249.78	1.37166	HLE	Huh7	Ras-related protein Rab-3D OS=Homo sapiens GN=RAB3D PE=1 SV=1 - [RAB3D_HUMAN]	0.000463549	0.000228998	RAB3D
P62314	3	3	285.11	1.37043	HLE	Huh7	Small nuclear ribonucleoprotein Sm D1 OS=Homo sapiens GN=SNRPD1 PE=1 SV=1 - [SMD1_HUMAN]	9.87481e-05	4.20441e-05	SNRPD1
P05141	16	6	1110.25	1.36877	HLE	Huh7	ADP/ATP translocase 2 OS=Homo sapiens GN=SLC25A5 PE=1 SV=7 - [ADT2_HUMAN]	0.00488336	0.00297787	SLC25A5
P30153	12	8	696.37	1.36481	HLE	Huh7	Serine/threonine-protein phosphatase 2A 65 kDa regulatory subunit A alpha isoform OS=Homo sapiens GN=PPP2R1A PE=1 SV=4 - [2AAA_HUMAN]	1.21421e-05	4.24421e-06	PPP2R1A
P10155	3	3	163.47	1.36138	HLE	Huh7	60 kDa SS-A/Ro ribonucleoprotein OS=Homo sapiens GN=TROVE2 PE=1 SV=2 - [RO60_HUMAN]	0.000371734	0.000179728	TROVE2
Q13283	9	8	505.11	1.35673	HLE	Huh7	Ras GTPase-activating protein-binding protein 1 OS=Homo sapiens GN=G3BP1 PE=1 SV=1 - [G3BP1_HUMAN]	0.00175269	0.000963898	G3BP1
P27694	8	8	430.34	1.35618	HLE	Huh7	Replication protein A 70 kDa DNA-binding subunit OS=Homo sapiens GN=RPA1 PE=1 SV=2 - [RFA1_HUMAN]	0.000370252	0.000178877	RPA1
Q8N3U4	5	5	228.19	1.35511	HLE	Huh7	Cohesin subunit SA-2 OS=Homo sapiens GN=STAG2 PE=1 SV=3 - [STAG2_HUMAN]	0.00328059	0.0019337	STAG2
O95571	2	2	104.53	1.3539	HLE	Huh7	Protein ETHE1, mitochondrial OS=Homo sapiens GN=ETHE1 PE=1 SV=2 - [ETHE1_HUMAN]	0.00199349	0.00110637	ETHE1
P50454	15	15	1089.01	1.35047	HLE	Huh7	Serpin H1 OS=Homo sapiens GN=SERPINH1 PE=1 SV=2 - [SERPH_HUMAN]	2.87405e-05	1.10685e-05	SERPINH1
P11586	19	18	1211.09	1.34745	HLE	Huh7	C-1-tetrahydrofolate synthase, cytoplasmic OS=Homo sapiens GN=MTHFD1 PE=1 SV=3 - [C1TC_HUMAN]	7.74638e-05	3.23633e-05	MTHFD1
Q96AG4	8	8	677.24	1.34607	HLE	Huh7	Leucine-rich repeat-containing protein 59 OS=Homo sapiens GN=LRRC59 PE=1 SV=1 - [LRC59_HUMAN]	0.00209103	0.00117037	LRRC59
P35659	4	4	263.62	1.34522	HLE	Huh7	Protein DEK OS=Homo sapiens GN=DEK PE=1 SV=1 - [DEK_HUMAN]	0.000118001	5.13123e-05	DEK
P55209	10	8	938.02	1.34515	HLE	Huh7	Nucleosome assembly protein 1-like 1 OS=Homo sapiens GN=NAP1L1 PE=1 SV=1 - [NP1L1_HUMAN]	0.000780216	0.000398746	NAP1L1
Q13523	2	2	103.24	1.34346	HLE	Huh7	Serine/threonine-protein kinase PRP4 homolog OS=Homo sapiens GN=PRPF4B PE=1 SV=3 - [PRP4B_HUMAN]	0.00803018	0.00506587	PRPF4B
P25786	6	6	295.57	1.34342	HLE	Huh7	Proteasome subunit alpha type-1 OS=Homo sapiens GN=PSMA1 PE=1 SV=1 - [PSA1_HUMAN]	0.00566596	0.00348801	PSMA1
P51970	3	3	143.04	1.34237	HLE	Huh7	NADH dehydrogenase [ubiquinone] 1 alpha subcomplex subunit 8 OS=Homo sapiens GN=NDUFA8 PE=1 SV=3 - [NDUA8_HUMAN]	0.0139265	0.00916665	NDUFA8
O75131	3	3	176.01	1.34199	HLE	Huh7	Copine-3 OS=Homo sapiens GN=CPNE3 PE=1 SV=1 - [CPNE3_HUMAN]	0.000856245	0.000443196	CPNE3
P46977	6	5	256.38	1.34112	HLE	Huh7	Dolichyl-diphosphooligosaccharide--protein glycosyltransferase subunit STT3A OS=Homo sapiens GN=STT3A PE=1 SV=2 - [STT3A_HUMAN]	0.0100357	0.0064549	STT3A
Q99459	6	6	295.32	1.3382	HLE	Huh7	Cell division cycle 5-like protein OS=Homo sapiens GN=CDC5L PE=1 SV=2 - [CDC5L_HUMAN]	0.00746203	0.00468578	CDC5L
P53041	3	3	155.12	1.33443	HLE	Huh7	Serine/threonine-protein phosphatase 5 OS=Homo sapiens GN=PPP5C PE=1 SV=1 - [PPP5_HUMAN]	0.00978534	0.00627256	PPP5C
Q92552	5	5	299.01	1.33267	HLE	Huh7	28S ribosomal protein S27, mitochondrial OS=Homo sapiens GN=MRPS27 PE=1 SV=3 - [RT27_HUMAN]	0.00441143	0.00267408	MRPS27
Q96DI7	4	4	174.82	1.33188	HLE	Huh7	U5 small nuclear ribonucleoprotein 40 kDa protein OS=Homo sapiens GN=SNRNP40 PE=1 SV=1 - [SNR40_HUMAN]	0.00164157	0.000897945	SNRNP40
P62937	17	17	1723.64	1.33	HLE	Huh7	Peptidyl-prolyl cis-trans isomerase A OS=Homo sapiens GN=PPIA PE=1 SV=2 - [PPIA_HUMAN]	0.00268086	0.00155013	PPIA
O43847	4	4	184.13	1.32636	HLE	Huh7	Nardilysin OS=Homo sapiens GN=NRD1 PE=1 SV=2 - [NRDC_HUMAN]	0.00257674	0.00148338	NRD1
P60660	8	8	664.11	1.32603	HLE	Huh7	Myosin light polypeptide 6 OS=Homo sapiens GN=MYL6 PE=1 SV=2 - [MYL6_HUMAN]	0.00196332	0.00108748	MYL6
Q9UKG1	3	3	123.02	1.32403	HLE	Huh7	DCC-interacting protein 13-alpha OS=Homo sapiens GN=APPL1 PE=1 SV=1 - [DP13A_HUMAN]	0.01419	0.00935871	APPL1
Q13564	4	4	202.61	1.31819	HLE	Huh7	NEDD8-activating enzyme E1 regulatory subunit OS=Homo sapiens GN=NAE1 PE=1 SV=1 - [ULA1_HUMAN]	0.000648463	0.000328115	NAE1
P24539	5	5	319.49	1.31509	HLE	Huh7	ATP synthase subunit b, mitochondrial OS=Homo sapiens GN=ATP5F1 PE=1 SV=2 - [AT5F1_HUMAN]	0.0206106	0.0140646	ATP5F1
O00469	9	8	410.73	1.31507	HLE	Huh7	Procollagen-lysine,2-oxoglutarate 5-dioxygenase 2 OS=Homo sapiens GN=PLOD2 PE=1 SV=2 - [PLOD2_HUMAN]	0.00353198	0.00210124	PLOD2
O00151	10	10	790.4	1.31304	HLE	Huh7	PDZ and LIM domain protein 1 OS=Homo sapiens GN=PDLIM1 PE=1 SV=4 - [PDLI1_HUMAN]	0.000103833	4.44353e-05	PDLIM1
P63208	2	2	171.23	1.31115	HLE	Huh7	S-phase kinase-associated protein 1 OS=Homo sapiens GN=SKP1 PE=1 SV=2 - [SKP1_HUMAN]	0.00201204	0.00111885	SKP1
P12268	15	15	1176.99	1.31079	HLE	Huh7	Inosine-5'-monophosphate dehydrogenase 2 OS=Homo sapiens GN=IMPDH2 PE=1 SV=2 - [IMDH2_HUMAN]	0.000187778	8.55396e-05	IMPDH2
O95071	3	3	121.99	1.30981	HLE	Huh7	E3 ubiquitin-protein ligase UBR5 OS=Homo sapiens GN=UBR5 PE=1 SV=2 - [UBR5_HUMAN]	0.00249741	0.00142683	UBR5
Q13185	9	6	807.83	1.3091	HLE	Huh7	Chromobox protein homolog 3 OS=Homo sapiens GN=CBX3 PE=1 SV=4 - [CBX3_HUMAN]	0.0222473	0.0152703	CBX3
P51571	6	6	425.09	1.30802	HLE	Huh7	Translocon-associated protein subunit delta OS=Homo sapiens GN=SSR4 PE=1 SV=1 - [SSRD_HUMAN]	0.000415757	0.000202672	SSR4
O00232	5	4	229.98	1.3074	HLE	Huh7	26S proteasome non-ATPase regulatory subunit 12 OS=Homo sapiens GN=PSMD12 PE=1 SV=3 - [PSD12_HUMAN]	0.00590893	0.00364616	PSMD12
Q13547	5	3	226.7	1.30701	HLE	Huh7	Histone deacetylase 1 OS=Homo sapiens GN=HDAC1 PE=1 SV=1 - [HDAC1_HUMAN]	0.00293772	0.00171465	HDAC1
Q16718	2	2	128.74	1.30534	HLE	Huh7	NADH dehydrogenase [ubiquinone] 1 alpha subcomplex subunit 5 OS=Homo sapiens GN=NDUFA5 PE=1 SV=3 - [NDUA5_HUMAN]	0.0109327	0.00704774	NDUFA5
P18754	7	7	523.94	1.30398	HLE	Huh7	Regulator of chromosome condensation OS=Homo sapiens GN=RCC1 PE=1 SV=1 - [RCC1_HUMAN]	1.06835e-06	2.90155e-07	RCC1
P62140	11	2	829.01	1.30369	HLE	Huh7	Serine/threonine-protein phosphatase PP1-beta catalytic subunit OS=Homo sapiens GN=PPP1CB PE=1 SV=3 - [PP1B_HUMAN]	0.049884	0.0365121	PPP1CB
Q92665	2	2	101.21	1.30248	HLE	Huh7	28S ribosomal protein S31, mitochondrial OS=Homo sapiens GN=MRPS31 PE=1 SV=3 - [RT31_HUMAN]	0.000720147	0.000366216	MRPS31
P42704	36	34	2695.18	1.30085	HLE	Huh7	Leucine-rich PPR motif-containing protein, mitochondrial OS=Homo sapiens GN=LRPPRC PE=1 SV=3 - [LPPRC_HUMAN]	0.000352906	0.000169472	LRPPRC
Q9NQP4	3	3	243.34	1.30073	HLE	Huh7	Prefoldin subunit 4 OS=Homo sapiens GN=PFDN4 PE=1 SV=1 - [PFD4_HUMAN]	0.0150387	0.00995668	PFDN4
P54709	2	2	204.5	1.29901	HLE	Huh7	Sodium/potassium-transporting ATPase subunit beta-3 OS=Homo sapiens GN=ATP1B3 PE=1 SV=1 - [AT1B3_HUMAN]	4.13177e-06	1.29727e-06	ATP1B3
Q9H0D6	8	8	396.74	1.29857	HLE	Huh7	5'-3' exoribonuclease 2 OS=Homo sapiens GN=XRN2 PE=1 SV=1 - [XRN2_HUMAN]	0.000825805	0.000425649	XRN2
Q15102	4	4	194.02	1.29733	HLE	Huh7	Platelet-activating factor acetylhydrolase IB subunit gamma OS=Homo sapiens GN=PAFAH1B3 PE=1 SV=1 - [PA1B3_HUMAN]	0.00685473	0.00429198	PAFAH1B3
P05787	41	35	3813.46	1.29714	HLE	Huh7	Keratin, type II cytoskeletal 8 OS=Homo sapiens GN=KRT8 PE=1 SV=7 - [K2C8_HUMAN]	0.0227354	0.0156713	KRT8
P18887	2	2	41.83	1.29666	HLE	Huh7	DNA repair protein XRCC1 OS=Homo sapiens GN=XRCC1 PE=1 SV=2 - [XRCC1_HUMAN]	0.00105783	0.000560975	XRCC1
Q9Y295	3	3	173.67	1.296	HLE	Huh7	Developmentally-regulated GTP-binding protein 1 OS=Homo sapiens GN=DRG1 PE=1 SV=1 - [DRG1_HUMAN]	0.00183995	0.00101448	DRG1
P38919	11	9	751.19	1.29599	HLE	Huh7	Eukaryotic initiation factor 4A-III OS=Homo sapiens GN=EIF4A3 PE=1 SV=4 - [IF4A3_HUMAN]	0.00123346	0.000660828	EIF4A3
Q14137	5	5	204.59	1.29568	HLE	Huh7	Ribosome biogenesis protein BOP1 OS=Homo sapiens GN=BOP1 PE=1 SV=2 - [BOP1_HUMAN]	0.00190478	0.00105368	BOP1
P55039	2	2	128.24	1.29497	HLE	Huh7	Developmentally-regulated GTP-binding protein 2 OS=Homo sapiens GN=DRG2 PE=1 SV=1 - [DRG2_HUMAN]	0.000213266	9.8079e-05	DRG2
Q92973	15	14	966.97	1.2948	HLE	Huh7	Transportin-1 OS=Homo sapiens GN=TNPO1 PE=1 SV=2 - [TNPO1_HUMAN]	0.000631319	0.000318753	TNPO1
Q9BYG3	2	2	87.72	1.29371	HLE	Huh7	MKI67 FHA domain-interacting nucleolar phosphoprotein OS=Homo sapiens GN=MKI67IP PE=1 SV=1 - [MK67I_HUMAN]	0.0375309	0.0267825	MKI67IP
O95168	2	2	83.03	1.29212	HLE	Huh7	NADH dehydrogenase [ubiquinone] 1 beta subcomplex subunit 4 OS=Homo sapiens GN=NDUFB4 PE=1 SV=3 - [NDUB4_HUMAN]	0.0202543	0.0137847	NDUFB4
P61086	6	6	241.11	1.28955	HLE	Huh7	Ubiquitin-conjugating enzyme E2 K OS=Homo sapiens GN=UBE2K PE=1 SV=3 - [UBE2K_HUMAN]	0.000983162	0.000516383	UBE2K
O75607	2	2	71.89	1.28895	HLE	Huh7	Nucleoplasmin-3 OS=Homo sapiens GN=NPM3 PE=1 SV=3 - [NPM3_HUMAN]	0.00407836	0.00246309	NPM3
Q6L8Q7	3	3	139.31	1.28872	HLE	Huh7	2',5'-phosphodiesterase 12 OS=Homo sapiens GN=PDE12 PE=1 SV=2 - [PDE12_HUMAN]	0.000417667	0.000203755	PDE12
P35658	3	3	173.19	1.28861	HLE	Huh7	Nuclear pore complex protein Nup214 OS=Homo sapiens GN=NUP214 PE=1 SV=2 - [NU214_HUMAN]	0.00115564	0.0006162	NUP214
P49790	6	6	270.09	1.28827	HLE	Huh7	Nuclear pore complex protein Nup153 OS=Homo sapiens GN=NUP153 PE=1 SV=2 - [NU153_HUMAN]	0.00818269	0.00516801	NUP153
P26368	6	6	390.17	1.28756	HLE	Huh7	Splicing factor U2AF 65 kDa subunit OS=Homo sapiens GN=U2AF2 PE=1 SV=4 - [U2AF2_HUMAN]	0.00137815	0.00074335	U2AF2
Q13838	13	5	933.81	1.28646	HLE	Huh7	Spliceosome RNA helicase DDX39B OS=Homo sapiens GN=DDX39B PE=1 SV=1 - [DX39B_HUMAN]	0.00102048	0.000539317	DDX39B
Q9UKM9	8	7	412.36	1.28615	HLE	Huh7	RNA-binding protein Raly OS=Homo sapiens GN=RALY PE=1 SV=1 - [RALY_HUMAN]	0.000853867	0.000441655	RALY
Q9Y266	2	2	191.57	1.28465	HLE	Huh7	Nuclear migration protein nudC OS=Homo sapiens GN=NUDC PE=1 SV=1 - [NUDC_HUMAN]	0.00796711	0.0050174	NUDC
P35579	70	61	6523.7	1.28355	HLE	Huh7	Myosin-9 OS=Homo sapiens GN=MYH9 PE=1 SV=4 - [MYH9_HUMAN]	0.00105135	0.000557156	MYH9
O75964	3	3	178.89	1.28174	HLE	Huh7	ATP synthase subunit g, mitochondrial OS=Homo sapiens GN=ATP5L PE=1 SV=3 - [ATP5L_HUMAN]	0.016558	0.0110707	ATP5L
Q99757	2	2	97.27	1.28092	HLE	Huh7	Thioredoxin, mitochondrial OS=Homo sapiens GN=TXN2 PE=1 SV=2 - [THIOM_HUMAN]	0.0193308	0.0131071	TXN2
P21266	6	6	277.17	1.28005	HLE	Huh7	Glutathione S-transferase Mu 3 OS=Homo sapiens GN=GSTM3 PE=1 SV=3 - [GSTM3_HUMAN]	0.020744	0.0141706	GSTM3
P62318	6	6	354.46	1.27788	HLE	Huh7	Small nuclear ribonucleoprotein Sm D3 OS=Homo sapiens GN=SNRPD3 PE=1 SV=1 - [SMD3_HUMAN]	0.0202972	0.0138286	SNRPD3
O76021	5	5	280.76	1.27737	HLE	Huh7	Ribosomal L1 domain-containing protein 1 OS=Homo sapiens GN=RSL1D1 PE=1 SV=3 - [RL1D1_HUMAN]	0.00149001	0.00080747	RSL1D1
P43243	13	13	752.16	1.27479	HLE	Huh7	Matrin-3 OS=Homo sapiens GN=MATR3 PE=1 SV=2 - [MATR3_HUMAN]	0.00556609	0.00341643	MATR3
Q15154	3	3	118.48	1.27412	HLE	Huh7	Pericentriolar material 1 protein OS=Homo sapiens GN=PCM1 PE=1 SV=4 - [PCM1_HUMAN]	0.00402274	0.00242679	PCM1
P22626	16	13	1607.73	1.27402	HLE	Huh7	Heterogeneous nuclear ribonucleoproteins A2/B1 OS=Homo sapiens GN=HNRNPA2B1 PE=1 SV=2 - [ROA2_HUMAN]	0.00401659	0.00242162	HNRNPA2B1
Q9BQ67	2	2	142.46	1.27214	HLE	Huh7	Glutamate-rich WD repeat-containing protein 1 OS=Homo sapiens GN=GRWD1 PE=1 SV=1 - [GRWD1_HUMAN]	0.0165974	0.0111031	GRWD1
Q99497	8	8	518.64	1.27156	HLE	Huh7	Protein DJ-1 OS=Homo sapiens GN=PARK7 PE=1 SV=2 - [PARK7_HUMAN]	0.0031803	0.00187008	PARK7
O60264	5	4	211.56	1.27063	HLE	Huh7	SWI/SNF-related matrix-associated actin-dependent regulator of chromatin subfamily A member 5 OS=Homo sapiens GN=SMARCA5 PE=1 SV=1 - [SMCA5_HUMAN]	0.0261787	0.0182539	SMARCA5
Q15008	12	12	509.16	1.26973	HLE	Huh7	26S proteasome non-ATPase regulatory subunit 6 OS=Homo sapiens GN=PSMD6 PE=1 SV=1 - [PSMD6_HUMAN]	0.000133712	5.90177e-05	PSMD6
O75947	5	5	422.98	1.26569	HLE	Huh7	ATP synthase subunit d, mitochondrial OS=Homo sapiens GN=ATP5H PE=1 SV=3 - [ATP5H_HUMAN]	0.00899808	0.00573852	ATP5H
P05023	24	23	1918.72	1.2607	HLE	Huh7	Sodium/potassium-transporting ATPase subunit alpha-1 OS=Homo sapiens GN=ATP1A1 PE=1 SV=1 - [AT1A1_HUMAN]	0.0199938	0.0135786	ATP1A1
P52298	2	2	94.74	1.26059	HLE	Huh7	Nuclear cap-binding protein subunit 2 OS=Homo sapiens GN=NCBP2 PE=1 SV=1 - [NCBP2_HUMAN]	0.000277346	0.000131072	NCBP2
Q9H7Z7	3	3	251.93	1.26038	HLE	Huh7	Prostaglandin E synthase 2 OS=Homo sapiens GN=PTGES2 PE=1 SV=1 - [PGES2_HUMAN]	0.00871343	0.00553485	PTGES2
O75083	18	17	1492.57	1.25938	HLE	Huh7	WD repeat-containing protein 1 OS=Homo sapiens GN=WDR1 PE=1 SV=4 - [WDR1_HUMAN]	2.22796e-05	8.35383e-06	WDR1
Q14444	5	5	244.18	1.25928	HLE	Huh7	Caprin-1 OS=Homo sapiens GN=CAPRIN1 PE=1 SV=2 - [CAPR1_HUMAN]	0.0136394	0.00894108	CAPRIN1
P48556	4	4	226.68	1.25632	HLE	Huh7	26S proteasome non-ATPase regulatory subunit 8 OS=Homo sapiens GN=PSMD8 PE=1 SV=2 - [PSMD8_HUMAN]	0.000179384	8.12598e-05	PSMD8
Q12874	6	6	488.68	1.25498	HLE	Huh7	Splicing factor 3A subunit 3 OS=Homo sapiens GN=SF3A3 PE=1 SV=1 - [SF3A3_HUMAN]	0.00843518	0.00534279	SF3A3
P54136	21	21	1244.91	1.25484	HLE	Huh7	Arginine--tRNA ligase, cytoplasmic OS=Homo sapiens GN=RARS PE=1 SV=2 - [SYRC_HUMAN]	0.00978998	0.00627909	RARS
Q15029	24	24	1551.94	1.25436	HLE	Huh7	116 kDa U5 small nuclear ribonucleoprotein component OS=Homo sapiens GN=EFTUD2 PE=1 SV=1 - [U5S1_HUMAN]	0.00132769	0.000715169	EFTUD2
P62820	11	4	789.19	1.25324	HLE	Huh7	Ras-related protein Rab-1A OS=Homo sapiens GN=RAB1A PE=1 SV=3 - [RAB1A_HUMAN]	0.0204662	0.0139512	RAB1A
Q16891	13	13	867.36	1.25291	HLE	Huh7	Mitochondrial inner membrane protein OS=Homo sapiens GN=IMMT PE=1 SV=1 - [IMMT_HUMAN]	0.00661201	0.00412081	IMMT
Q8TDD1	2	2	78.93	1.2522	HLE	Huh7	ATP-dependent RNA helicase DDX54 OS=Homo sapiens GN=DDX54 PE=1 SV=2 - [DDX54_HUMAN]	0.0122733	0.0079832	DDX54
Q86Y39	2	2	71.54	1.2517	HLE	Huh7	NADH dehydrogenase [ubiquinone] 1 alpha subcomplex subunit 11 OS=Homo sapiens GN=NDUFA11 PE=1 SV=3 - [NDUAB_HUMAN]	0.0416555	0.0300132	NDUFA11
Q9ULC4	2	2	63.56	1.25125	HLE	Huh7	Malignant T-cell-amplified sequence 1 OS=Homo sapiens GN=MCTS1 PE=1 SV=1 - [MCTS1_HUMAN]	0.00383389	0.00230312	MCTS1
Q9Y2X3	12	12	806.39	1.25125	HLE	Huh7	Nucleolar protein 58 OS=Homo sapiens GN=NOP58 PE=1 SV=1 - [NOP58_HUMAN]	0.00234984	0.00132973	NOP58
O14828	4	4	398.14	1.25116	HLE	Huh7	Secretory carrier-associated membrane protein 3 OS=Homo sapiens GN=SCAMP3 PE=1 SV=3 - [SCAM3_HUMAN]	0.0153241	0.0101679	SCAMP3
Q96EY1	3	3	135.78	1.25097	HLE	Huh7	DnaJ homolog subfamily A member 3, mitochondrial OS=Homo sapiens GN=DNAJA3 PE=1 SV=2 - [DNJA3_HUMAN]	0.0236317	0.0163492	DNAJA3
P62495	4	4	165.51	1.25066	HLE	Huh7	Eukaryotic peptide chain release factor subunit 1 OS=Homo sapiens GN=ETF1 PE=1 SV=3 - [ERF1_HUMAN]	0.0184955	0.0125004	ETF1
Q13263	22	21	1673.43	1.2474	HLE	Huh7	Transcription intermediary factor 1-beta OS=Homo sapiens GN=TRIM28 PE=1 SV=5 - [TIF1B_HUMAN]	0.000896206	0.000465507	TRIM28
Q13435	13	13	598.62	1.24629	HLE	Huh7	Splicing factor 3B subunit 2 OS=Homo sapiens GN=SF3B2 PE=1 SV=2 - [SF3B2_HUMAN]	0.00203982	0.00113653	SF3B2
P14174	4	4	234.3	1.24498	HLE	Huh7	Macrophage migration inhibitory factor OS=Homo sapiens GN=MIF PE=1 SV=4 - [MIF_HUMAN]	0.00667713	0.00416866	MIF
P49419	12	12	705.25	1.24484	HLE	Huh7	Alpha-aminoadipic semialdehyde dehydrogenase OS=Homo sapiens GN=ALDH7A1 PE=1 SV=5 - [AL7A1_HUMAN]	0.00821617	0.00519215	ALDH7A1
Q13505	3	3	150.6	1.24262	HLE	Huh7	Metaxin-1 OS=Homo sapiens GN=MTX1 PE=1 SV=2 - [MTX1_HUMAN]	0.0132684	0.00868344	MTX1
P37198	2	2	184.55	1.24251	HLE	Huh7	Nuclear pore glycoprotein p62 OS=Homo sapiens GN=NUP62 PE=1 SV=3 - [NUP62_HUMAN]	0.0131926	0.0086147	NUP62
O00231	11	11	704.63	1.24093	HLE	Huh7	26S proteasome non-ATPase regulatory subunit 11 OS=Homo sapiens GN=PSMD11 PE=1 SV=3 - [PSD11_HUMAN]	0.00243518	0.00138597	PSMD11
O96008	7	7	356.17	1.24044	HLE	Huh7	Mitochondrial import receptor subunit TOM40 homolog OS=Homo sapiens GN=TOMM40 PE=1 SV=1 - [TOM40_HUMAN]	0.0343527	0.0243898	TOMM40
O60884	4	4	168.37	1.2375	HLE	Huh7	DnaJ homolog subfamily A member 2 OS=Homo sapiens GN=DNAJA2 PE=1 SV=1 - [DNJA2_HUMAN]	0.0174887	0.0117565	DNAJA2
Q9NVI7	6	2	333.7	1.23337	HLE	Huh7	ATPase family AAA domain-containing protein 3A OS=Homo sapiens GN=ATAD3A PE=1 SV=2 - [ATD3A_HUMAN]	0.0135321	0.00886583	ATAD3A
Q16204	3	3	151.21	1.23291	HLE	Huh7	Coiled-coil domain-containing protein 6 OS=Homo sapiens GN=CCDC6 PE=1 SV=2 - [CCDC6_HUMAN]	0.00864253	0.00548354	CCDC6
P36915	2	2	87.02	1.23288	HLE	Huh7	Guanine nucleotide-binding protein-like 1 OS=Homo sapiens GN=GNL1 PE=1 SV=2 - [GNL1_HUMAN]	0.00218491	0.00122688	GNL1
P06576	29	29	2602.38	1.23246	HLE	Huh7	ATP synthase subunit beta, mitochondrial OS=Homo sapiens GN=ATP5B PE=1 SV=3 - [ATPB_HUMAN]	0.00422149	0.00255435	ATP5B
Q9P258	14	14	709.84	1.23245	HLE	Huh7	Protein RCC2 OS=Homo sapiens GN=RCC2 PE=1 SV=2 - [RCC2_HUMAN]	0.000430204	0.000210339	RCC2
Q8NBS9	11	11	649.19	1.2309	HLE	Huh7	Thioredoxin domain-containing protein 5 OS=Homo sapiens GN=TXNDC5 PE=1 SV=2 - [TXND5_HUMAN]	0.00432709	0.00262139	TXNDC5
O43707	41	28	3196.52	1.2309	HLE	Huh7	Alpha-actinin-4 OS=Homo sapiens GN=ACTN4 PE=1 SV=2 - [ACTN4_HUMAN]	0.0255637	0.0177786	ACTN4
P39656	10	10	746.82	1.23073	HLE	Huh7	Dolichyl-diphosphooligosaccharide--protein glycosyltransferase 48 kDa subunit OS=Homo sapiens GN=DDOST PE=1 SV=4 - [OST48_HUMAN]	0.0199938	0.0135954	DDOST
Q9Y2B0	5	5	448.14	1.22783	HLE	Huh7	Protein canopy homolog 2 OS=Homo sapiens GN=CNPY2 PE=1 SV=1 - [CNPY2_HUMAN]	0.0140611	0.00926859	CNPY2
Q13148	7	7	505.09	1.22576	HLE	Huh7	TAR DNA-binding protein 43 OS=Homo sapiens GN=TARDBP PE=1 SV=1 - [TADBP_HUMAN]	0.0211319	0.014451	TARDBP
P22087	14	14	950.86	1.22574	HLE	Huh7	rRNA 2'-O-methyltransferase fibrillarin OS=Homo sapiens GN=FBL PE=1 SV=2 - [FBRL_HUMAN]	0.0114474	0.00738369	FBL
P25705	29	28	2833.4	1.22572	HLE	Huh7	ATP synthase subunit alpha, mitochondrial OS=Homo sapiens GN=ATP5A1 PE=1 SV=1 - [ATPA_HUMAN]	0.00992056	0.00637365	ATP5A1
Q01780	3	3	112.3	1.22304	HLE	Huh7	Exosome component 10 OS=Homo sapiens GN=EXOSC10 PE=1 SV=2 - [EXOSX_HUMAN]	0.0134202	0.00878768	EXOSC10
Q9NZL4	3	3	150.43	1.22123	HLE	Huh7	Hsp70-binding protein 1 OS=Homo sapiens GN=HSPBP1 PE=1 SV=1 - [HPBP1_HUMAN]	0.00677622	0.00424037	HSPBP1
O75937	2	2	94.66	1.21627	HLE	Huh7	DnaJ homolog subfamily C member 8 OS=Homo sapiens GN=DNAJC8 PE=1 SV=2 - [DNJC8_HUMAN]	0.0338304	0.0239821	DNAJC8
Q6ZRP7	2	2	67.31	1.21587	HLE	Huh7	Sulfhydryl oxidase 2 OS=Homo sapiens GN=QSOX2 PE=1 SV=3 - [QSOX2_HUMAN]	0.00179861	0.000990379	QSOX2
Q99798	8	8	498.49	1.2134	HLE	Huh7	Aconitate hydratase, mitochondrial OS=Homo sapiens GN=ACO2 PE=1 SV=2 - [ACON_HUMAN]	0.00311817	0.00183016	ACO2
Q9Y5J7	2	2	73.38	1.21091	HLE	Huh7	Mitochondrial import inner membrane translocase subunit Tim9 OS=Homo sapiens GN=TIMM9 PE=1 SV=1 - [TIM9_HUMAN]	0.0411629	0.0295984	TIMM9
Q9NVJ2	2	2	105.07	1.21063	HLE	Huh7	ADP-ribosylation factor-like protein 8B OS=Homo sapiens GN=ARL8B PE=1 SV=1 - [ARL8B_HUMAN]	0.0261783	0.0182441	ARL8B
O43684	7	7	541.46	1.21048	HLE	Huh7	Mitotic checkpoint protein BUB3 OS=Homo sapiens GN=BUB3 PE=1 SV=1 - [BUB3_HUMAN]	0.00609231	0.00377038	BUB3
Q14683	5	4	199.48	1.2104	HLE	Huh7	Structural maintenance of chromosomes protein 1A OS=Homo sapiens GN=SMC1A PE=1 SV=2 - [SMC1A_HUMAN]	0.00393345	0.00236435	SMC1A
Q8NBF2	2	2	78.57	1.20856	HLE	Huh7	NHL repeat-containing protein 2 OS=Homo sapiens GN=NHLRC2 PE=1 SV=1 - [NHLC2_HUMAN]	0.00183256	0.00100974	NHLRC2
Q14974	16	16	1052.32	1.20838	HLE	Huh7	Importin subunit beta-1 OS=Homo sapiens GN=KPNB1 PE=1 SV=2 - [IMB1_HUMAN]	0.00393442	0.00236636	KPNB1
Q9GZT3	3	2	263.62	1.2062	HLE	Huh7	SRA stem-loop-interacting RNA-binding protein, mitochondrial OS=Homo sapiens GN=SLIRP PE=1 SV=1 - [SLIRP_HUMAN]	0.00478196	0.00291084	SLIRP
P45974	11	11	542.85	1.20512	HLE	Huh7	Ubiquitin carboxyl-terminal hydrolase 5 OS=Homo sapiens GN=USP5 PE=1 SV=2 - [UBP5_HUMAN]	0.00342697	0.00202882	USP5
Q9NUQ9	2	2	23.62	1.20497	HLE	Huh7	Protein FAM49B OS=Homo sapiens GN=FAM49B PE=1 SV=1 - [FA49B_HUMAN]	0.00648581	0.00403274	FAM49B
P82930	3	3	102.17	1.20478	HLE	Huh7	28S ribosomal protein S34, mitochondrial OS=Homo sapiens GN=MRPS34 PE=1 SV=2 - [RT34_HUMAN]	0.020995	0.0143498	MRPS34
Q8N1G4	4	4	165.55	1.20426	HLE	Huh7	Leucine-rich repeat-containing protein 47 OS=Homo sapiens GN=LRRC47 PE=1 SV=1 - [LRC47_HUMAN]	0.0143672	0.0094808	LRRC47
Q8WU90	2	2	134.46	1.20342	HLE	Huh7	Zinc finger CCCH domain-containing protein 15 OS=Homo sapiens GN=ZC3H15 PE=1 SV=1 - [ZC3HF_HUMAN]	0.0199938	0.0136001	ZC3H15
P48047	6	6	426.37	1.20336	HLE	Huh7	ATP synthase subunit O, mitochondrial OS=Homo sapiens GN=ATP5O PE=1 SV=1 - [ATPO_HUMAN]	0.0235264	0.0162593	ATP5O
P28331	10	10	544.83	1.19924	HLE	Huh7	NADH-ubiquinone oxidoreductase 75 kDa subunit, mitochondrial OS=Homo sapiens GN=NDUFS1 PE=1 SV=3 - [NDUS1_HUMAN]	0.0120821	0.00783694	NDUFS1
Q86WA6	2	2	59.9	1.19636	HLE	Huh7	Valacyclovir hydrolase OS=Homo sapiens GN=BPHL PE=1 SV=1 - [BPHL_HUMAN]	0.026125	0.0181974	BPHL
P59998	6	6	422.66	1.19575	HLE	Huh7	Actin-related protein 2/3 complex subunit 4 OS=Homo sapiens GN=ARPC4 PE=1 SV=3 - [ARPC4_HUMAN]	0.00407836	0.0024633	ARPC4
P49321	13	13	890.77	1.19493	HLE	Huh7	Nuclear autoantigenic sperm protein OS=Homo sapiens GN=NASP PE=1 SV=2 - [NASP_HUMAN]	0.00100422	0.000528173	NASP
P34932	24	23	1579.51	1.19245	HLE	Huh7	Heat shock 70 kDa protein 4 OS=Homo sapiens GN=HSPA4 PE=1 SV=4 - [HSP74_HUMAN]	0.00100701	0.000531103	HSPA4
Q5JTJ3	2	2	68.77	1.19192	HLE	Huh7	Uncharacterized protein C1orf31 OS=Homo sapiens GN=C1orf31 PE=1 SV=1 - [CA031_HUMAN]	0.0433821	0.0313831	C1orf31
P61158	7	7	356.19	1.19105	HLE	Huh7	Actin-related protein 3 OS=Homo sapiens GN=ACTR3 PE=1 SV=3 - [ARP3_HUMAN]	0.0138764	0.00911662	ACTR3
O43809	4	4	204.38	1.19048	HLE	Huh7	Cleavage and polyadenylation specificity factor subunit 5 OS=Homo sapiens GN=NUDT21 PE=1 SV=1 - [CPSF5_HUMAN]	0.0498695	0.0364745	NUDT21
Q13409	4	4	272.26	1.18878	HLE	Huh7	Cytoplasmic dynein 1 intermediate chain 2 OS=Homo sapiens GN=DYNC1I2 PE=1 SV=3 - [DC1I2_HUMAN]	0.0488047	0.0356071	DYNC1I2
Q8IZL8	4	4	272.99	1.1878	HLE	Huh7	Proline-, glutamic acid- and leucine-rich protein 1 OS=Homo sapiens GN=PELP1 PE=1 SV=2 - [PELP1_HUMAN]	0.0344924	0.0245015	LP1
Q07955	11	10	618.1	1.18775	HLE	Huh7	Serine/arginine-rich splicing factor 1 OS=Homo sapiens GN=SRSF1 PE=1 SV=2 - [SRSF1_HUMAN]	0.0438738	0.0317866	SRSF1
P51398	2	2	105.04	1.18705	HLE	Huh7	28S ribosomal protein S29, mitochondrial OS=Homo sapiens GN=DAP3 PE=1 SV=1 - [RT29_HUMAN]	0.0223005	0.0153149	DAP3
P18859	4	4	166.33	1.18568	HLE	Huh7	ATP synthase-coupling factor 6, mitochondrial OS=Homo sapiens GN=ATP5J PE=1 SV=1 - [ATP5J_HUMAN]	0.0338104	0.0239557	ATP5J
Q96HS1	2	2	88.5	1.18565	HLE	Huh7	Serine/threonine-protein phosphatase PGAM5, mitochondrial OS=Homo sapiens GN=PGAM5 PE=1 SV=2 - [PGAM5_HUMAN]	0.0136454	0.00895003	PGAM5
P60900	6	6	518.9	1.18094	HLE	Huh7	Proteasome subunit alpha type-6 OS=Homo sapiens GN=PSMA6 PE=1 SV=1 - [PSA6_HUMAN]	0.0234826	0.0162204	PSMA6
Q16629	5	4	395.77	1.17659	HLE	Huh7	Serine/arginine-rich splicing factor 7 OS=Homo sapiens GN=SRSF7 PE=1 SV=1 - [SRSF7_HUMAN]	0.0319224	0.02256	SRSF7
P18669	11	11	1071.71	1.17327	HLE	Huh7	Phosphoglycerate mutase 1 OS=Homo sapiens GN=PGAM1 PE=1 SV=2 - [PGAM1_HUMAN]	0.0285317	0.0199981	PGAM1
P14625	37	35	3013.64	1.16988	HLE	Huh7	Endoplasmin OS=Homo sapiens GN=HSP90B1 PE=1 SV=1 - [ENPL_HUMAN]	0.0171072	0.011469	HSP90B1
P06737	11	9	694.41	1.16862	HLE	Huh7	Glycogen phosphorylase, liver form OS=Homo sapiens GN=PYGL PE=1 SV=4 - [PYGL_HUMAN]	0.00116193	0.000619978	PYGL
P25205	20	20	1399.26	1.16861	HLE	Huh7	DNA replication licensing factor MCM3 OS=Homo sapiens GN=MCM3 PE=1 SV=3 - [MCM3_HUMAN]	0.0401337	0.0287855	MCM3
O15372	4	4	197.28	1.16791	HLE	Huh7	Eukaryotic translation initiation factor 3 subunit H OS=Homo sapiens GN=EIF3H PE=1 SV=1 - [EIF3H_HUMAN]	0.0256002	0.0178132	EIF3H
P23246	13	13	1254.11	1.16732	HLE	Huh7	Splicing factor, proline- and glutamine-rich OS=Homo sapiens GN=SFPQ PE=1 SV=2 - [SFPQ_HUMAN]	0.0199938	0.0135984	SFPQ
Q14204	63	62	3337.26	1.16669	HLE	Huh7	Cytoplasmic dynein 1 heavy chain 1 OS=Homo sapiens GN=DYNC1H1 PE=1 SV=5 - [DYHC1_HUMAN]	0.000733727	0.000373655	DYNC1H1
Q7L014	10	10	627.69	1.16507	HLE	Huh7	Probable ATP-dependent RNA helicase DDX46 OS=Homo sapiens GN=DDX46 PE=1 SV=2 - [DDX46_HUMAN]	0.0165019	0.0110273	DDX46
O00567	14	13	852.6	1.16457	HLE	Huh7	Nucleolar protein 56 OS=Homo sapiens GN=NOP56 PE=1 SV=4 - [NOP56_HUMAN]	0.0428146	0.0309105	NOP56
P23368	3	3	115.77	1.1623	HLE	Huh7	NAD-dependent malic enzyme, mitochondrial OS=Homo sapiens GN=ME2 PE=1 SV=1 - [MAOM_HUMAN]	0.0215102	0.0147298	ME2
P61160	6	6	530.61	1.15863	HLE	Huh7	Actin-related protein 2 OS=Homo sapiens GN=ACTR2 PE=1 SV=1 - [ARP2_HUMAN]	0.00934087	0.0059707	ACTR2
Q6UXN9	2	2	74.71	1.15359	HLE	Huh7	WD repeat-containing protein 82 OS=Homo sapiens GN=WDR82 PE=1 SV=1 - [WDR82_HUMAN]	0.0352716	0.0250806	WDR82
P55786	12	12	691.83	1.15334	HLE	Huh7	Puromycin-sensitive aminopeptidase OS=Homo sapiens GN=NPEPPS PE=1 SV=2 - [PSA_HUMAN]	0.0285951	0.0200529	NPPS
Q99460	15	15	1034.79	1.15289	HLE	Huh7	26S proteasome non-ATPase regulatory subunit 1 OS=Homo sapiens GN=PSMD1 PE=1 SV=2 - [PSMD1_HUMAN]	0.0295502	0.0207656	PSMD1
P68400	7	7	388.98	1.15176	HLE	Huh7	Casein kinase II subunit alpha OS=Homo sapiens GN=CSNK2A1 PE=1 SV=1 - [CSK21_HUMAN]	0.0331166	0.0234521	CSNK2A1
Q6P2Q9	29	29	1414.38	1.14948	HLE	Huh7	Pre-mRNA-processing-splicing factor 8 OS=Homo sapiens GN=PRPF8 PE=1 SV=2 - [PRP8_HUMAN]	0.0217793	0.0149254	PRPF8
Q15637	5	5	275.03	1.14931	HLE	Huh7	Splicing factor 1 OS=Homo sapiens GN=SF1 PE=1 SV=4 - [SF01_HUMAN]	0.00503441	0.00307364	SF1
Q9NQT4	2	2	80.63	1.14718	HLE	Huh7	Exosome complex component RRP46 OS=Homo sapiens GN=EXOSC5 PE=1 SV=1 - [EXOS5_HUMAN]	0.029614	0.0208299	EXOSC5
O43290	5	4	284.27	1.14325	HLE	Huh7	U4/U6.U5 tri-snRNP-associated protein 1 OS=Homo sapiens GN=SART1 PE=1 SV=1 - [SNUT1_HUMAN]	0.0245634	0.0170472	SART1
P33992	11	11	620.66	1.14175	HLE	Huh7	DNA replication licensing factor MCM5 OS=Homo sapiens GN=MCM5 PE=1 SV=5 - [MCM5_HUMAN]	0.0151359	0.010032	MCM5
Q9UI30	3	3	281.38	1.14031	HLE	Huh7	tRNA methyltransferase 112 homolog OS=Homo sapiens GN=TRMT112 PE=1 SV=1 - [TR112_HUMAN]	0.0392701	0.0281091	TRMT112
O43242	10	10	711.63	1.13903	HLE	Huh7	26S proteasome non-ATPase regulatory subunit 3 OS=Homo sapiens GN=PSMD3 PE=1 SV=2 - [PSMD3_HUMAN]	0.00382924	0.00229893	PSMD3
O00487	4	4	224.31	1.13808	HLE	Huh7	26S proteasome non-ATPase regulatory subunit 14 OS=Homo sapiens GN=PSMD14 PE=1 SV=1 - [PSDE_HUMAN]	0.0467615	0.0340485	PSMD14
Q9BUF5	22	7	1856.9	1.13312	HLE	Huh7	Tubulin beta-6 chain OS=Homo sapiens GN=TUBB6 PE=1 SV=1 - [TBB6_HUMAN]	0.00269877	0.00156343	TUBB6
Q9BWJ5	3	3	111.78	1.12968	HLE	Huh7	Splicing factor 3B subunit 5 OS=Homo sapiens GN=SF3B5 PE=1 SV=1 - [SF3B5_HUMAN]	0.0242786	0.016832	SF3B5
Q9UHD8	11	11	617.45	1.12787	HLE	Huh7	Septin-9 OS=Homo sapiens GN=SEPT9 PE=1 SV=2 - [SEPT9_HUMAN]	0.0370127	0.0263589	SEPT9
P30101	29	29	2109.23	1.12154	HLE	Huh7	Protein disulfide-isomerase A3 OS=Homo sapiens GN=PDIA3 PE=1 SV=4 - [PDIA3_HUMAN]	0.0167874	0.0112363	PDIA3
Q92499	9	9	480.3	1.11847	HLE	Huh7	ATP-dependent RNA helicase DDX1 OS=Homo sapiens GN=DDX1 PE=1 SV=2 - [DDX1_HUMAN]	0.00382359	0.00229415	DDX1
P25787	6	6	426.29	1.10469	HLE	Huh7	Proteasome subunit alpha type-2 OS=Homo sapiens GN=PSMA2 PE=1 SV=2 - [PSA2_HUMAN]	0.04464	0.0323579	PSMA2
P51665	10	10	610.32	1.10311	HLE	Huh7	26S proteasome non-ATPase regulatory subunit 7 OS=Homo sapiens GN=PSMD7 PE=1 SV=2 - [PSD7_HUMAN]	0.0455925	0.0331477	PSMD7
P49915	11	11	554.1	1.09811	HLE	Huh7	GMP synthase [glutamine-hydrolyzing] OS=Homo sapiens GN=GMPS PE=1 SV=1 - [GUAA_HUMAN]	0.0149203	0.00987285	GMPS
P62826	7	7	620.84	1.09478	HLE	Huh7	GTP-binding nuclear protein Ran OS=Homo sapiens GN=RAN PE=1 SV=3 - [RAN_HUMAN]	0.0192395	0.0130242	RAN
P12956	22	20	1759.32	1.08668	HLE	Huh7	X-ray repair cross-complementing protein 6 OS=Homo sapiens GN=XRCC6 PE=1 SV=2 - [XRCC6_HUMAN]	0.0305267	0.0215515	XRCC6

## Sheet: More expressed in HUH7
Accession	Peptide.count	Unique.peptides	Confidence.score	Max.fold.change	Highest.mean.condition	Lowest.mean.condition	Description	p.ANOVA.FDR	p.ANOVA	Name		Consistently altered metabolic genes identified in human HCC that their encoded protein is differentially upregulated in HUH7 (n=87)
P30047	2	2	98.95	378.898	Huh7	HLE	GTP cyclohydrolase 1 feedback regulatory protein OS=Homo sapiens GN=GCHFR PE=1 SV=3 - [GFRP_HUMAN]	1.63571e-06	4.66667e-07	GCHFR		EHHADH
P31025	2	2	96.64	111.759	Huh7	HLE	Lipocalin-1 OS=Homo sapiens GN=LCN1 PE=1 SV=1 - [LCN1_HUMAN]	0.0451435	0.0327618	LCN1		ASL		Proteins are selected based on p.ANOVA.FDR < 0.05, total number = 616
Q9GZZ8	2	2	110.93	105.366	Huh7	HLE	Extracellular glycoprotein lacritin OS=Homo sapiens GN=LACRT PE=1 SV=1 - [LACRT_HUMAN]	0.043016	0.0311027	LACRT		ATP1B1		More expressed (or upregulated) in HUH7 cells (i.e. in comparison to HLE cells).
P33908	2	2	69.03	48.1991	Huh7	HLE	Mannosyl-oligosaccharide 1,2-alpha-mannosidase IA OS=Homo sapiens GN=MAN1A1 PE=1 SV=3 - [MA1A1_HUMAN]	4.55448e-10	3.40553e-11	MAN1A1		AGL
P02647	2	2	160.3	29.038	Huh7	HLE	Apolipoprotein A-I OS=Homo sapiens GN=APOA1 PE=1 SV=1 - [APOA1_HUMAN]	2.79052e-12	6.68509e-14	APOA1		IDH3B
P07306	2	2	80.14	24.7237	Huh7	HLE	Asialoglycoprotein receptor 1 OS=Homo sapiens GN=ASGR1 PE=1 SV=2 - [ASGR1_HUMAN]	4.39271e-11	2.02495e-12	ASGR1		ADI1		For a full list of consistently altered metabolic targets in human HCC, including details of how the genes were selected,
Q99856	4	4	250.61	23.9406	Huh7	HLE	AT-rich interactive domain-containing protein 3A OS=Homo sapiens GN=ARID3A PE=1 SV=2 - [ARI3A_HUMAN]	1.44007e-09	1.40879e-10	ARID3A		HNMT		Nwosu et al 2017 CMGH. Table S1.		https://www.ncbi.nlm.nih.gov/pubmed/28840186
P50440	8	7	637.44	22.7333	Huh7	HLE	Glycine amidinotransferase, mitochondrial OS=Homo sapiens GN=GATM PE=1 SV=1 - [GATM_HUMAN]	4.53497e-13	5.59669e-15	GATM		ALDH1B1
P32322	6	5	325.38	22.668	Huh7	HLE	Pyrroline-5-carboxylate reductase 1, mitochondrial OS=Homo sapiens GN=PYCR1 PE=1 SV=2 - [P5CR1_HUMAN]	2.76049e-12	6.4564e-14	PYCR1		GCAT
Q9HCM4	2	2	70.21	21.8612	Huh7	HLE	Band 4.1-like protein 5 OS=Homo sapiens GN=EPB41L5 PE=1 SV=3 - [E41L5_HUMAN]	1.16669e-10	6.64865e-12	EPB41L5		SULT2A1
P50120	2	2	80.94	17.9642	Huh7	HLE	Retinol-binding protein 2 OS=Homo sapiens GN=RBP2 PE=1 SV=3 - [RET2_HUMAN]	5.90991e-09	7.86803e-10	RBP2		SLC39A14
P02771	24	24	1596.38	17.1996	Huh7	HLE	Alpha-fetoprotein OS=Homo sapiens GN=AFP PE=1 SV=1 - [FETA_HUMAN]	1.7032e-14	7.79483e-17	AFP		GRHPR
P01019	5	5	243.94	16.8267	Huh7	HLE	Angiotensinogen OS=Homo sapiens GN=AGT PE=1 SV=1 - [ANGT_HUMAN]	6.09904e-12	1.5784e-13	AGT		SEPHS1
Q8TB37	3	3	246.5	15.6286	Huh7	HLE	Iron-sulfur protein NUBPL OS=Homo sapiens GN=NUBPL PE=1 SV=3 - [NUBPL_HUMAN]	6.57412e-11	3.31689e-12	NUBPL		QPRT
Q9H3G5	3	3	147.64	15.2787	Huh7	HLE	Probable serine carboxypeptidase CPVL OS=Homo sapiens GN=CPVL PE=1 SV=2 - [CPVL_HUMAN]	2.32543e-11	8.94721e-13	CPVL		NNT
Q13576	8	8	380.65	14.5687	Huh7	HLE	Ras GTPase-activating-like protein IQGAP2 OS=Homo sapiens GN=IQGAP2 PE=1 SV=4 - [IQGA2_HUMAN]	4.04092e-12	9.82729e-14	IQGAP2		DDAH2
Q9NYL4	4	4	220.64	14.2743	Huh7	HLE	Peptidyl-prolyl cis-trans isomerase FKBP11 OS=Homo sapiens GN=FKBP11 PE=1 SV=1 - [FKB11_HUMAN]	8.34777e-10	7.24181e-11	FKBP11		GAMT
P19823	8	8	436.22	14.2565	Huh7	HLE	Inter-alpha-trypsin inhibitor heavy chain H2 OS=Homo sapiens GN=ITIH2 PE=1 SV=2 - [ITIH2_HUMAN]	1.7032e-14	7.59991e-17	ITIH2		CA2
P30626	3	3	183.04	13.0873	Huh7	HLE	Sorcin OS=Homo sapiens GN=SRI PE=1 SV=1 - [SORCN_HUMAN]	4.81557e-09	6.0039e-10	SRI		HK2
P50135	3	3	197.6	12.8251	Huh7	HLE	Histamine N-methyltransferase OS=Homo sapiens GN=HNMT PE=1 SV=1 - [HNMT_HUMAN]	8.29781e-10	7.16835e-11	HNMT		CBS
P27144	4	4	189.94	12.8131	Huh7	HLE	Adenylate kinase isoenzyme 4, mitochondrial OS=Homo sapiens GN=AK4 PE=1 SV=1 - [KAD4_HUMAN]	1.69522e-11	5.78404e-13	AK4		DAK
P32119	9	8	529.99	12.712	Huh7	HLE	Peroxiredoxin-2 OS=Homo sapiens GN=PRDX2 PE=1 SV=5 - [PRDX2_HUMAN]	2.61054e-12	5.59064e-14	PRDX2		BCAT1
P05091	13	12	871.93	12.5856	Huh7	HLE	Aldehyde dehydrogenase, mitochondrial OS=Homo sapiens GN=ALDH2 PE=1 SV=2 - [ALDH2_HUMAN]	1.11985e-12	1.66656e-14	ALDH2		QDPR
P49006	2	2	105.89	12.1372	Huh7	HLE	MARCKS-related protein OS=Homo sapiens GN=MARCKSL1 PE=1 SV=2 - [MRP_HUMAN]	5.79192e-09	7.63146e-10	MARCKSL1		ENPP1
Q99956	5	5	290.49	11.7364	Huh7	HLE	Dual specificity protein phosphatase 9 OS=Homo sapiens GN=DUSP9 PE=1 SV=1 - [DUS9_HUMAN]	1.99549e-12	4.05618e-14	DUSP9		ME1
P12277	14	13	1250.3	11.6256	Huh7	HLE	Creatine kinase B-type OS=Homo sapiens GN=CKB PE=1 SV=1 - [KCRB_HUMAN]	1.7032e-14	7.04068e-17	CKB		ARG1
P00918	4	4	248.49	11.2054	Huh7	HLE	Carbonic anhydrase 2 OS=Homo sapiens GN=CA2 PE=1 SV=2 - [CAH2_HUMAN]	1.01108e-11	2.89928e-13	CA2		ACBD3
P15144	3	3	125.81	11.076	Huh7	HLE	Aminopeptidase N OS=Homo sapiens GN=ANPEP PE=1 SV=4 - [AMPN_HUMAN]	1.0207e-08	1.46242e-09	ANP		HADH
Q5VT66	3	3	165.73	10.8416	Huh7	HLE	MOSC domain-containing protein 1, mitochondrial OS=Homo sapiens GN=MARC1 PE=1 SV=1 - [MOSC1_HUMAN]	7.85389e-11	4.10887e-12	MARC1		PYCR1
Q14914	10	10	467.97	10.7909	Huh7	HLE	Prostaglandin reductase 1 OS=Homo sapiens GN=PTGR1 PE=1 SV=2 - [PTGR1_HUMAN]	3.24645e-10	2.2625e-11	PTGR1		PCK2
P04424	2	2	79.22	10.7632	Huh7	HLE	Argininosuccinate lyase OS=Homo sapiens GN=ASL PE=1 SV=4 - [ARLY_HUMAN]	2.74735e-08	4.65703e-09	ASL		SARDH
Q8WWI1	3	3	135.95	10.7276	Huh7	HLE	LIM domain only protein 7 OS=Homo sapiens GN=LMO7 PE=1 SV=3 - [LMO7_HUMAN]	4.25075e-10	3.1167e-11	LMO7		PAH
P12429	4	4	187.12	9.98888	Huh7	HLE	Annexin A3 OS=Homo sapiens GN=ANXA3 PE=1 SV=3 - [ANXA3_HUMAN]	1.99237e-09	2.10446e-10	ANXA3		ACO1
P35520	4	4	159.14	9.56821	Huh7	HLE	Cystathionine beta-synthase OS=Homo sapiens GN=CBS PE=1 SV=2 - [CBS_HUMAN]	1.80618e-09	1.88157e-10	CBS		ADSS
Q92597	2	2	94.9	9.56287	Huh7	HLE	Protein NDRG1 OS=Homo sapiens GN=NDRG1 PE=1 SV=1 - [NDRG1_HUMAN]	4.30425e-08	7.68672e-09	NDRG1		ADSL
P51654	3	3	113.52	9.55787	Huh7	HLE	Glypican-3 OS=Homo sapiens GN=GPC3 PE=1 SV=1 - [GPC3_HUMAN]	1.19333e-10	6.84379e-12	GPC3		ABHD10
Q01581	22	22	1736.82	9.55656	Huh7	HLE	Hydroxymethylglutaryl-CoA synthase, cytoplasmic OS=Homo sapiens GN=HMGCS1 PE=1 SV=2 - [HMCS1_HUMAN]	2.69012e-13	2.73406e-15	HMGCS1		ABCD3
Q04828	10	9	728.81	9.36049	Huh7	HLE	Aldo-keto reductase family 1 member C1 OS=Homo sapiens GN=AKR1C1 PE=1 SV=1 - [AK1C1_HUMAN]	2.913e-14	1.7975e-16	AKR1C1		SRM
P62760	3	3	169.1	9.27771	Huh7	HLE	Visinin-like protein 1 OS=Homo sapiens GN=VSNL1 PE=1 SV=2 - [VISL1_HUMAN]	1.85383e-09	1.93794e-10	VSNL1		CAT
Q9H6R3	3	3	193.16	9.24892	Huh7	HLE	Acyl-CoA synthetase short-chain family member 3, mitochondrial OS=Homo sapiens GN=ACSS3 PE=2 SV=1 - [ACSS3_HUMAN]	9.8249e-11	5.27799e-12	ACSS3		NQO1
P08727	18	12	1369.11	8.87937	Huh7	HLE	Keratin, type I cytoskeletal 19 OS=Homo sapiens GN=KRT19 PE=1 SV=4 - [K1C19_HUMAN]	6.66162e-11	3.38521e-12	KRT19		SORD
Q6ZN17	5	5	309.5	8.74062	Huh7	HLE	Protein lin-28 homolog B OS=Homo sapiens GN=LIN28B PE=1 SV=1 - [LN28B_HUMAN]	1.01005e-10	5.60937e-12	LIN28B		IDI1
P11498	36	36	2455.62	8.71953	Huh7	HLE	Pyruvate carboxylase, mitochondrial OS=Homo sapiens GN=PC PE=1 SV=2 - [PYC_HUMAN]	1.72969e-14	8.78973e-17	PC		ACADSB
P01009	5	5	357.51	8.64133	Huh7	HLE	Alpha-1-antitrypsin OS=Homo sapiens GN=SERPINA1 PE=1 SV=3 - [A1AT_HUMAN]	6.56357e-12	1.81064e-13	SERPINA1		PSPH
P55157	20	19	1124.95	8.53751	Huh7	HLE	Microsomal triglyceride transfer protein large subunit OS=Homo sapiens GN=MTTP PE=1 SV=1 - [MTP_HUMAN]	1.12325e-12	1.79393e-14	MTTP		CPOX
Q13017	10	10	538.21	8.41017	Huh7	HLE	Rho GTPase-activating protein 5 OS=Homo sapiens GN=ARHGAP5 PE=1 SV=2 - [RHG05_HUMAN]	2.85518e-11	1.16073e-12	ARHGAP5		NANS
Q93099	9	9	490.68	8.34636	Huh7	HLE	Homogentisate 1,2-dioxygenase OS=Homo sapiens GN=HGD PE=1 SV=2 - [HGD_HUMAN]	2.63978e-12	5.83375e-14	HGD		ABCF1
P07148	11	11	1052.44	8.34089	Huh7	HLE	Fatty acid-binding protein, liver OS=Homo sapiens GN=FABP1 PE=1 SV=1 - [FABPL_HUMAN]	1.31881e-11	4.35613e-13	FABP1		GATM
Q9Y617	20	20	1208.83	8.27841	Huh7	HLE	Phosphoserine aminotransferase OS=Homo sapiens GN=PSAT1 PE=1 SV=2 - [SERC_HUMAN]	1.7032e-14	8.03689e-17	PSAT1		ASNS
Q86YP4	2	2	75.36	8.14766	Huh7	HLE	Transcriptional repressor p66-alpha OS=Homo sapiens GN=GATAD2A PE=1 SV=1 - [P66A_HUMAN]	6.44935e-07	1.65506e-07	GATAD2A		TXNRD1
P15374	2	2	139.22	8.06683	Huh7	HLE	Ubiquitin carboxyl-terminal hydrolase isozyme L3 OS=Homo sapiens GN=UCHL3 PE=1 SV=1 - [UCHL3_HUMAN]	1.4813e-08	2.27975e-09	UCHL3		ACAA1
Q9BWD1	13	13	985.75	8.04289	Huh7	HLE	Acetyl-CoA acetyltransferase, cytosolic OS=Homo sapiens GN=ACAT2 PE=1 SV=2 - [THIC_HUMAN]	1.12325e-12	1.78412e-14	ACAT2		FDPS
P78330	6	6	333.06	8.03621	Huh7	HLE	Phosphoserine phosphatase OS=Homo sapiens GN=PSPH PE=1 SV=2 - [SERB_HUMAN]	1.07346e-11	3.11711e-13	PSPH		A1CF
P02649	5	5	279.96	7.78194	Huh7	HLE	Apolipoprotein E OS=Homo sapiens GN=APOE PE=1 SV=1 - [APOE_HUMAN]	1.99944e-10	1.22652e-11	APOE		UGP2
Q5ZPR3	3	3	247.63	7.42499	Huh7	HLE	CD276 antigen OS=Homo sapiens GN=CD276 PE=1 SV=1 - [CD276_HUMAN]	5.0624e-10	3.87719e-11	CD276		ACAA2
O75874	21	19	1353.48	7.40687	Huh7	HLE	Isocitrate dehydrogenase [NADP] cytoplasmic OS=Homo sapiens GN=IDH1 PE=1 SV=2 - [IDHC_HUMAN]	7.0617e-14	4.97425e-16	IDH1		ACOX1
P52735	3	2	139.1	7.19846	Huh7	HLE	Guanine nucleotide exchange factor VAV2 OS=Homo sapiens GN=VAV2 PE=1 SV=2 - [VAV2_HUMAN]	3.54183e-05	1.39102e-05	VAV2		GLDC
P48681	11	10	567.33	7.18201	Huh7	HLE	Nestin OS=Homo sapiens GN=NES PE=1 SV=2 - [NEST_HUMAN]	4.28364e-11	1.95912e-12	NES		HGD
Q99447	2	2	66.03	7.04721	Huh7	HLE	Ethanolamine-phosphate cytidylyltransferase OS=Homo sapiens GN=PCYT2 PE=1 SV=1 - [PCY2_HUMAN]	6.52217e-12	1.75187e-13	PCYT2		PFAS
P52789	5	4	328.17	7.00286	Huh7	HLE	Hexokinase-2 OS=Homo sapiens GN=HK2 PE=1 SV=2 - [HXK2_HUMAN]	1.598e-10	9.35476e-12	HK2		DLAT
O14745	6	6	366.55	6.86015	Huh7	HLE	Na(+)/H(+) exchange regulatory cofactor NHE-RF1 OS=Homo sapiens GN=SLC9A3R1 PE=1 SV=4 - [NHRF1_HUMAN]	7.7909e-11	4.04391e-12	SLC9A3R1		AGPS
O95864	6	5	405.4	6.68949	Huh7	HLE	Fatty acid desaturase 2 OS=Homo sapiens GN=FADS2 PE=1 SV=1 - [FADS2_HUMAN]	7.73955e-09	1.08157e-09	FADS2		PRDX1
P04114	9	9	354.71	6.47571	Huh7	HLE	Apolipoprotein B-100 OS=Homo sapiens GN=APOB PE=1 SV=2 - [APOB_HUMAN]	6.14114e-11	3.05694e-12	APOB		ALDH2
Q9BV57	3	3	206.06	6.44164	Huh7	HLE	1,2-dihydroxy-3-keto-5-methylthiopentene dioxygenase OS=Homo sapiens GN=ADI1 PE=1 SV=1 - [MTND_HUMAN]	6.14114e-11	3.06739e-12	ADI1		GOT1
Q99541	9	9	546.85	6.38252	Huh7	HLE	Perilipin-2 OS=Homo sapiens GN=PLIN2 PE=1 SV=2 - [PLIN2_HUMAN]	4.53307e-12	1.13532e-13	PLIN2		ACSL3
O75600	3	3	102.64	6.32899	Huh7	HLE	2-amino-3-ketobutyrate coenzyme A ligase, mitochondrial OS=Homo sapiens GN=GCAT PE=1 SV=1 - [KBL_HUMAN]	4.85603e-09	6.09868e-10	GCAT		ACACA
Q16762	2	2	112.98	6.30306	Huh7	HLE	Thiosulfate sulfurtransferase OS=Homo sapiens GN=TST PE=1 SV=4 - [THTR_HUMAN]	7.58888e-11	3.91151e-12	TST		CKB
P23378	9	9	511.16	6.23451	Huh7	HLE	Glycine dehydrogenase [decarboxylating], mitochondrial OS=Homo sapiens GN=GLDC PE=1 SV=2 - [GCSP_HUMAN]	1.88908e-12	3.70273e-14	GLDC		PGM1
P02751	6	6	373.65	6.18201	Huh7	HLE	Fibronectin OS=Homo sapiens GN=FN1 PE=1 SV=4 - [FINC_HUMAN]	2.12246e-08	3.46681e-09	FN1		GPI
Q9UDY2	11	10	592.11	6.04858	Huh7	HLE	Tight junction protein ZO-2 OS=Homo sapiens GN=TJP2 PE=1 SV=2 - [ZO2_HUMAN]	1.16536e-11	3.63777e-13	TJP2		ALDOA
P02760	3	3	161.71	6.04399	Huh7	HLE	Protein AMBP OS=Homo sapiens GN=AMBP PE=1 SV=1 - [AMBP_HUMAN]	6.12486e-10	4.88045e-11	AMBP		PGD
O00499	4	4	172.77	6.00627	Huh7	HLE	Myc box-dependent-interacting protein 1 OS=Homo sapiens GN=BIN1 PE=1 SV=1 - [BIN1_HUMAN]	7.47931e-09	1.03706e-09	BIN1		ACSL4
Q4G0N4	5	5	268.78	5.94781	Huh7	HLE	NAD kinase domain-containing protein 1 OS=Homo sapiens GN=NADKD1 PE=1 SV=2 - [NAKD1_HUMAN]	3.06766e-10	2.11445e-11	NADKD1		ALDH18A1
Q16822	5	5	244.61	5.91549	Huh7	HLE	Phosphoenolpyruvate carboxykinase [GTP], mitochondrial OS=Homo sapiens GN=PCK2 PE=1 SV=3 - [PCKGM_HUMAN]	1.82193e-10	1.09924e-11	PCK2		UGDH
P22413	4	4	150.45	5.76769	Huh7	HLE	Ectonucleotide pyrophosphatase/phosphodiesterase family member 1 OS=Homo sapiens GN=ENPP1 PE=1 SV=2 - [ENPP1_HUMAN]	2.00057e-08	3.24594e-09	ENPP1		GFPT1
P02787	22	22	1258.39	5.74059	Huh7	HLE	Serotransferrin OS=Homo sapiens GN=TF PE=1 SV=3 - [TRFE_HUMAN]	3.02129e-10	2.00688e-11	TF		GLUD1
P08243	7	7	378	5.68657	Huh7	HLE	Asparagine synthetase [glutamine-hydrolyzing] OS=Homo sapiens GN=ASNS PE=1 SV=4 - [ASNS_HUMAN]	7.75895e-12	2.19673e-13	ASNS		MDH2
Q9UL12	5	5	258.2	5.62889	Huh7	HLE	Sarcosine dehydrogenase, mitochondrial OS=Homo sapiens GN=SARDH PE=1 SV=1 - [SARDH_HUMAN]	2.31667e-10	1.46316e-11	SARDH		MTTP
Q9NQ94	8	8	405.82	5.53003	Huh7	HLE	APOBEC1 complementation factor OS=Homo sapiens GN=A1CF PE=1 SV=1 - [A1CF_HUMAN]	3.95445e-11	1.71204e-12	A1CF		PHGDH
Q2Q1W2	5	5	193.23	5.42959	Huh7	HLE	Tripartite motif-containing protein 71 OS=Homo sapiens GN=TRIM71 PE=2 SV=1 - [LIN41_HUMAN]	9.04957e-08	1.79021e-08	TRIM71		ATIC
P49327	109	109	9782.3	5.30454	Huh7	HLE	Fatty acid synthase OS=Homo sapiens GN=FASN PE=1 SV=3 - [FAS_HUMAN]	1.5601e-13	1.30244e-15	FASN		PSAT1
P09327	13	13	796.63	5.25621	Huh7	HLE	Villin-1 OS=Homo sapiens GN=VIL1 PE=1 SV=4 - [VILI_HUMAN]	2.7983e-10	1.83845e-11	VIL1		TF
Q9Y320	2	2	179.35	5.22969	Huh7	HLE	Thioredoxin-related transmembrane protein 2 OS=Homo sapiens GN=TMX2 PE=1 SV=1 - [TMX2_HUMAN]	9.60939e-08	1.92759e-08	TMX2		GAPDH
Q96HC4	12	12	596.65	5.0719	Huh7	HLE	PDZ and LIM domain protein 5 OS=Homo sapiens GN=PDLIM5 PE=1 SV=5 - [PDLI5_HUMAN]	1.24139e-09	1.17231e-10	PDLIM5		ACLY
P53602	7	7	332.82	5.02731	Huh7	HLE	Diphosphomevalonate decarboxylase OS=Homo sapiens GN=MVD PE=1 SV=1 - [MVD1_HUMAN]	6.9668e-10	5.84149e-11	MVD		PC
O60701	18	18	1335.14	4.89124	Huh7	HLE	UDP-glucose 6-dehydrogenase OS=Homo sapiens GN=UGDH PE=1 SV=1 - [UGDH_HUMAN]	1.68393e-13	1.5143e-15	UGDH		PKM
O95486	4	4	245.78	4.87421	Huh7	HLE	Protein transport protein Sec24A OS=Homo sapiens GN=SEC24A PE=1 SV=2 - [SC24A_HUMAN]	1.5276e-09	1.51928e-10	SEC24A		FASN
Q14353	4	4	339.51	4.85191	Huh7	HLE	Guanidinoacetate N-methyltransferase OS=Homo sapiens GN=GAMT PE=1 SV=1 - [GAMT_HUMAN]	1.12325e-12	1.7495e-14	GAMT
P54760	2	2	67	4.7509	Huh7	HLE	Ephrin type-B receptor 4 OS=Homo sapiens GN=EPHB4 PE=1 SV=2 - [EPHB4_HUMAN]	7.67352e-07	2.00821e-07	EPHB4
Q00796	7	6	404.03	4.74278	Huh7	HLE	Sorbitol dehydrogenase OS=Homo sapiens GN=SORD PE=1 SV=4 - [DHSO_HUMAN]	2.61054e-12	5.56167e-14	SORD
Q08426	2	2	113.57	4.71674	Huh7	HLE	Peroxisomal bifunctional enzyme OS=Homo sapiens GN=EHHADH PE=1 SV=3 - [ECHP_HUMAN]	3.60094e-09	4.30021e-10	EHHADH
Q9Y5Z4	3	3	158.48	4.62026	Huh7	HLE	Heme-binding protein 2 OS=Homo sapiens GN=HEBP2 PE=1 SV=1 - [HEBP2_HUMAN]	2.8886e-08	4.95937e-09	HEBP2
P30086	7	7	736.04	4.61078	Huh7	HLE	Phosphatidylethanolamine-binding protein 1 OS=Homo sapiens GN=PEBP1 PE=1 SV=3 - [PEBP1_HUMAN]	3.79889e-11	1.59953e-12	BP1
Q6NXE6	3	3	129.38	4.51269	Huh7	HLE	Armadillo repeat-containing protein 6 OS=Homo sapiens GN=ARMC6 PE=1 SV=2 - [ARMC6_HUMAN]	5.54878e-10	4.37054e-11	ARMC6
P07108	5	5	462	4.47846	Huh7	HLE	Acyl-CoA-binding protein OS=Homo sapiens GN=DBI PE=1 SV=2 - [ACBP_HUMAN]	5.30939e-08	9.88646e-09	DBI
O43505	2	2	155.37	4.45262	Huh7	HLE	N-acetyllactosaminide beta-1,3-N-acetylglucosaminyltransferase OS=Homo sapiens GN=B3GNT1 PE=1 SV=1 - [B3GN1_HUMAN]	5.2166e-09	6.64619e-10	B3GNT1
Q5T6V5	2	2	125.46	4.43719	Huh7	HLE	UPF0553 protein C9orf64 OS=Homo sapiens GN=C9orf64 PE=1 SV=1 - [CI064_HUMAN]	9.60939e-08	1.92505e-08	C9orf64
P25325	6	6	382.17	4.36369	Huh7	HLE	3-mercaptopyruvate sulfurtransferase OS=Homo sapiens GN=MPST PE=1 SV=3 - [THTM_HUMAN]	7.20551e-13	9.67709e-15	MPST
P27487	3	3	128.78	4.33804	Huh7	HLE	Dipeptidyl peptidase 4 OS=Homo sapiens GN=DPP4 PE=1 SV=2 - [DPP4_HUMAN]	2.85724e-06	8.69098e-07	DPP4
O14618	2	2	84.8	4.19456	Huh7	HLE	Copper chaperone for superoxide dismutase OS=Homo sapiens GN=CCS PE=1 SV=1 - [CCS_HUMAN]	2.5907e-09	2.84764e-10	CCS
Q9NY33	18	18	1357.22	4.18689	Huh7	HLE	Dipeptidyl peptidase 3 OS=Homo sapiens GN=DPP3 PE=1 SV=2 - [DPP3_HUMAN]	1.97585e-11	7.02845e-13	DPP3
Q9Y2K7	3	3	163.62	4.1525	Huh7	HLE	Lysine-specific demethylase 2A OS=Homo sapiens GN=KDM2A PE=1 SV=3 - [KDM2A_HUMAN]	1.59742e-06	4.54583e-07	KDM2A
O15027	3	3	118.14	4.15209	Huh7	HLE	Protein transport protein Sec16A OS=Homo sapiens GN=SEC16A PE=1 SV=3 - [SC16A_HUMAN]	1.39711e-09	1.354e-10	SEC16A
Q13907	7	6	329.86	4.09311	Huh7	HLE	Isopentenyl-diphosphate Delta-isomerase 1 OS=Homo sapiens GN=IDI1 PE=1 SV=2 - [IDI1_HUMAN]	2.6494e-12	6.05852e-14	IDI1
P02753	5	5	354.83	3.98053	Huh7	HLE	Retinol-binding protein 4 OS=Homo sapiens GN=RBP4 PE=1 SV=3 - [RET4_HUMAN]	1.62184e-08	2.54314e-09	RBP4
P17931	5	5	322.92	3.97948	Huh7	HLE	Galectin-3 OS=Homo sapiens GN=LGALS3 PE=1 SV=5 - [LEG3_HUMAN]	5.73474e-11	2.81013e-12	LGALS3
P20020	5	4	321.47	3.96321	Huh7	HLE	Plasma membrane calcium-transporting ATPase 1 OS=Homo sapiens GN=ATP2B1 PE=1 SV=3 - [AT2B1_HUMAN]	1.28063e-08	1.93816e-09	ATP2B1
Q16850	5	5	188.15	3.9491	Huh7	HLE	Lanosterol 14-alpha demethylase OS=Homo sapiens GN=CYP51A1 PE=1 SV=3 - [CP51A_HUMAN]	4.93556e-10	3.76213e-11	CYP51A1
Q8WVM8	14	14	1244.18	3.94279	Huh7	HLE	Sec1 family domain-containing protein 1 OS=Homo sapiens GN=SCFD1 PE=1 SV=4 - [SCFD1_HUMAN]	3.91723e-13	4.54996e-15	SCFD1
Q15800	2	2	131.9	3.84805	Huh7	HLE	Methylsterol monooxygenase 1 OS=Homo sapiens GN=MSMO1 PE=1 SV=1 - [MSMO1_HUMAN]	3.46845e-05	1.35465e-05	MSMO1
Q9Y2L1	2	2	122.14	3.8377	Huh7	HLE	Exosome complex exonuclease RRP44 OS=Homo sapiens GN=DIS3 PE=1 SV=2 - [RRP44_HUMAN]	3.079e-08	5.36451e-09	DIS3
Q9Y639	2	2	109.98	3.79807	Huh7	HLE	Neuroplastin OS=Homo sapiens GN=NPTN PE=1 SV=2 - [NPTN_HUMAN]	9.07476e-09	1.28134e-09	NPTN
P37268	7	7	470.86	3.78282	Huh7	HLE	Squalene synthase OS=Homo sapiens GN=FDFT1 PE=1 SV=1 - [FDFT_HUMAN]	9.01896e-10	7.95502e-11	FDFT1
P30740	3	3	212.5	3.76579	Huh7	HLE	Leukocyte elastase inhibitor OS=Homo sapiens GN=SERPINB1 PE=1 SV=1 - [ILEU_HUMAN]	3.38919e-11	1.39012e-12	SERPINB1
P08237	6	5	301.54	3.74202	Huh7	HLE	6-phosphofructokinase, muscle type OS=Homo sapiens GN=PFKM PE=1 SV=2 - [K6PF_HUMAN]	4.49759e-10	3.34666e-11	PFKM
Q07954	7	7	348.71	3.72099	Huh7	HLE	Prolow-density lipoprotein receptor-related protein 1 OS=Homo sapiens GN=LRP1 PE=1 SV=2 - [LRP1_HUMAN]	5.84891e-09	7.72778e-10	LRP1
Q9Y256	2	2	78.75	3.70147	Huh7	HLE	CAAX prenyl protease 2 OS=Homo sapiens GN=RCE1 PE=1 SV=1 - [FACE2_HUMAN]	3.59088e-07	8.53731e-08	RCE1
P21589	4	4	184.59	3.70088	Huh7	HLE	5'-nucleotidase OS=Homo sapiens GN=NT5E PE=1 SV=1 - [5NTD_HUMAN]	1.14911e-09	1.06361e-10	NT5E
P51690	3	3	196.85	3.57644	Huh7	HLE	Arylsulfatase E OS=Homo sapiens GN=ARSE PE=1 SV=2 - [ARSE_HUMAN]	4.75756e-08	8.70349e-09	ARSE
P30085	8	8	537.71	3.56809	Huh7	HLE	UMP-CMP kinase OS=Homo sapiens GN=CMPK1 PE=1 SV=3 - [KCY_HUMAN]	3.95445e-11	1.72244e-12	CMPK1
P08195	12	12	856.02	3.46048	Huh7	HLE	4F2 cell-surface antigen heavy chain OS=Homo sapiens GN=SLC3A2 PE=1 SV=3 - [4F2_HUMAN]	1.3043e-08	1.9884e-09	SLC3A2
P15104	4	4	180.74	3.37796	Huh7	HLE	Glutamine synthetase OS=Homo sapiens GN=GLUL PE=1 SV=4 - [GLNA_HUMAN]	8.07657e-09	1.1316e-09	GLUL
O95372	2	2	84.87	3.37688	Huh7	HLE	Acyl-protein thioesterase 2 OS=Homo sapiens GN=LYPLA2 PE=1 SV=1 - [LYPA2_HUMAN]	2.06257e-05	7.68877e-06	LYPLA2
P30837	3	3	150.84	3.37576	Huh7	HLE	Aldehyde dehydrogenase X, mitochondrial OS=Homo sapiens GN=ALDH1B1 PE=1 SV=3 - [AL1B1_HUMAN]	4.01353e-09	4.86576e-10	ALDH1B1
Q9NZI8	17	15	1464.88	3.36032	Huh7	HLE	Insulin-like growth factor 2 mRNA-binding protein 1 OS=Homo sapiens GN=IGF2BP1 PE=1 SV=2 - [IF2B1_HUMAN]	1.78992e-08	2.8583e-09	IGF2BP1
P23434	4	4	274.53	3.34991	Huh7	HLE	Glycine cleavage system H protein, mitochondrial OS=Homo sapiens GN=GCSH PE=1 SV=2 - [GCSH_HUMAN]	6.76378e-07	1.74557e-07	GCSH
P46109	4	4	189.19	3.34182	Huh7	HLE	Crk-like protein OS=Homo sapiens GN=CRKL PE=1 SV=1 - [CRKL_HUMAN]	3.3569e-09	3.97223e-10	CRKL
Q9NR19	4	4	147.45	3.22969	Huh7	HLE	Acetyl-coenzyme A synthetase, cytoplasmic OS=Homo sapiens GN=ACSS2 PE=1 SV=1 - [ACSA_HUMAN]	8.37072e-08	1.63161e-08	ACSS2
P21980	2	2	116.77	3.22536	Huh7	HLE	Protein-glutamine gamma-glutamyltransferase 2 OS=Homo sapiens GN=TGM2 PE=1 SV=2 - [TGM2_HUMAN]	8.83277e-06	3.01372e-06	TGM2
Q15436	12	11	752	3.22406	Huh7	HLE	Protein transport protein Sec23A OS=Homo sapiens GN=SEC23A PE=1 SV=2 - [SC23A_HUMAN]	2.64757e-11	1.0475e-12	SEC23A
P53634	5	5	329.34	3.21094	Huh7	HLE	Dipeptidyl peptidase 1 OS=Homo sapiens GN=CTSC PE=1 SV=2 - [CATC_HUMAN]	7.64384e-09	1.06265e-09	CTSC
P52209	14	14	693.69	3.18705	Huh7	HLE	6-phosphogluconate dehydrogenase, decarboxylating OS=Homo sapiens GN=PGD PE=1 SV=3 - [6PGD_HUMAN]	1.06188e-09	9.63596e-11	PGD
Q06520	3	3	101.23	3.16158	Huh7	HLE	Bile salt sulfotransferase OS=Homo sapiens GN=SULT2A1 PE=1 SV=3 - [ST2A1_HUMAN]	7.47931e-09	1.03659e-09	SULT2A1
P31483	4	2	133.5	3.14606	Huh7	HLE	Nucleolysin TIA-1 isoform p40 OS=Homo sapiens GN=TIA1 PE=1 SV=3 - [TIA1_HUMAN]	5.75592e-08	1.08015e-08	TIA1
Q15392	6	6	383.29	3.12674	Huh7	HLE	Delta(24)-sterol reductase OS=Homo sapiens GN=DHCR24 PE=1 SV=2 - [DHC24_HUMAN]	7.76762e-10	6.62574e-11	DHCR24
P11172	6	6	306.73	3.10729	Huh7	HLE	Uridine 5'-monophosphate synthase OS=Homo sapiens GN=UMPS PE=1 SV=1 - [UMPS_HUMAN]	5.46522e-10	4.28489e-11	UMPS
P30041	15	15	1116.64	3.08698	Huh7	HLE	Peroxiredoxin-6 OS=Homo sapiens GN=PRDX6 PE=1 SV=3 - [PRDX6_HUMAN]	3.84651e-10	2.72258e-11	PRDX6
O60488	19	16	1216.59	3.0622	Huh7	HLE	Long-chain-fatty-acid--CoA ligase 4 OS=Homo sapiens GN=ACSL4 PE=1 SV=2 - [ACSL4_HUMAN]	7.50583e-10	6.37519e-11	ACSL4
Q9H0W9	2	2	97.89	3.05367	Huh7	HLE	Ester hydrolase C11orf54 OS=Homo sapiens GN=C11orf54 PE=1 SV=1 - [CK054_HUMAN]	3.06782e-08	5.32275e-09	C11orf54
P00491	7	7	343.96	3.04761	Huh7	HLE	Purine nucleoside phosphorylase OS=Homo sapiens GN=PNP PE=1 SV=2 - [PNPH_HUMAN]	1.65304e-10	9.90024e-12	PNP
P09110	7	7	555.14	3.0429	Huh7	HLE	3-ketoacyl-CoA thiolase, peroxisomal OS=Homo sapiens GN=ACAA1 PE=1 SV=2 - [THIK_HUMAN]	1.51164e-09	1.49792e-10	ACAA1
Q9P2E9	33	32	3132.98	3.03026	Huh7	HLE	Ribosome-binding protein 1 OS=Homo sapiens GN=RRBP1 PE=1 SV=4 - [RRBP1_HUMAN]	1.07142e-08	1.55171e-09	RRBP1
P48163	4	4	162.75	3.00496	Huh7	HLE	NADP-dependent malic enzyme OS=Homo sapiens GN=ME1 PE=1 SV=1 - [MAOX_HUMAN]	3.22685e-07	7.54298e-08	ME1
P05089	4	4	195.22	2.99785	Huh7	HLE	Arginase-1 OS=Homo sapiens GN=ARG1 PE=1 SV=2 - [ARGI1_HUMAN]	0.000321994	0.000153341	ARG1
Q3LXA3	4	4	187.56	2.95297	Huh7	HLE	Bifunctional ATP-dependent dihydroxyacetone kinase/FAD-AMP lyase (cyclizing) OS=Homo sapiens GN=DAK PE=1 SV=2 - [DHAK_HUMAN]	4.82786e-09	6.04578e-10	DAK
P45954	6	6	489.01	2.94719	Huh7	HLE	Short/branched chain specific acyl-CoA dehydrogenase, mitochondrial OS=Homo sapiens GN=ACADSB PE=1 SV=1 - [ACDSB_HUMAN]	6.09904e-12	1.59394e-13	ACADSB
P22059	7	7	372.6	2.93744	Huh7	HLE	Oxysterol-binding protein 1 OS=Homo sapiens GN=OSBP PE=1 SV=1 - [OSBP1_HUMAN]	7.90961e-10	6.77556e-11	OSBP
P02675	3	3	102.21	2.91171	Huh7	HLE	Fibrinogen beta chain OS=Homo sapiens GN=FGB PE=1 SV=2 - [FIBB_HUMAN]	5.02989e-08	9.32949e-09	FGB
P22061	3	3	211.95	2.90401	Huh7	HLE	Protein-L-isoaspartate(D-aspartate) O-methyltransferase OS=Homo sapiens GN=PCMT1 PE=1 SV=4 - [PIMT_HUMAN]	4.86906e-08	8.99583e-09	PCMT1
Q86TB9	2	2	72.94	2.89219	Huh7	HLE	Protein PAT1 homolog 1 OS=Homo sapiens GN=PATL1 PE=1 SV=2 - [PATL1_HUMAN]	1.75843e-07	3.85897e-08	PATL1
Q14257	4	4	415.63	2.83016	Huh7	HLE	Reticulocalbin-2 OS=Homo sapiens GN=RCN2 PE=1 SV=1 - [RCN2_HUMAN]	8.6262e-08	1.68767e-08	RCN2
P58107	2	2	84.78	2.82524	Huh7	HLE	Epiplakin OS=Homo sapiens GN=EPPK1 PE=1 SV=2 - [EPIPL_HUMAN]	4.74276e-08	8.65919e-09	EPPK1
Q06210	18	18	1374.21	2.78697	Huh7	HLE	Glucosamine--fructose-6-phosphate aminotransferase [isomerizing] 1 OS=Homo sapiens GN=GFPT1 PE=1 SV=3 - [GFPT1_HUMAN]	1.70339e-09	1.71266e-10	GFPT1
P51812	14	13	827.65	2.78626	Huh7	HLE	Ribosomal protein S6 kinase alpha-3 OS=Homo sapiens GN=RPS6KA3 PE=1 SV=1 - [KS6A3_HUMAN]	8.51295e-10	7.4469e-11	RPS6KA3
O00170	6	6	317.4	2.77644	Huh7	HLE	AH receptor-interacting protein OS=Homo sapiens GN=AIP PE=1 SV=2 - [AIP_HUMAN]	1.7011e-08	2.6736e-09	AIP
Q9GZZ9	4	4	202.09	2.7685	Huh7	HLE	Ubiquitin-like modifier-activating enzyme 5 OS=Homo sapiens GN=UBA5 PE=1 SV=1 - [UBA5_HUMAN]	3.079e-08	5.35679e-09	UBA5
P14324	7	7	403.26	2.76796	Huh7	HLE	Farnesyl pyrophosphate synthase OS=Homo sapiens GN=FDPS PE=1 SV=4 - [FPPS_HUMAN]	5.33454e-09	6.92826e-10	FDPS
P15924	12	12	512.81	2.74537	Huh7	HLE	Desmoplakin OS=Homo sapiens GN=DSP PE=1 SV=3 - [DESP_HUMAN]	0.000197354	9.02598e-05	DSP
Q14166	6	5	235.75	2.7414	Huh7	HLE	Tubulin--tyrosine ligase-like protein 12 OS=Homo sapiens GN=TTLL12 PE=1 SV=2 - [TTL12_HUMAN]	1.97565e-11	6.95601e-13	TTLL12
P00439	5	5	207.06	2.73807	Huh7	HLE	Phenylalanine-4-hydroxylase OS=Homo sapiens GN=PAH PE=1 SV=1 - [PH4H_HUMAN]	1.58054e-09	1.57767e-10	PAH
P09211	13	13	1392.51	2.72292	Huh7	HLE	Glutathione S-transferase P OS=Homo sapiens GN=GSTP1 PE=1 SV=2 - [GSTP1_HUMAN]	3.36379e-10	2.35648e-11	GSTP1
Q9HD20	4	4	220.07	2.71836	Huh7	HLE	Probable cation-transporting ATPase 13A1 OS=Homo sapiens GN=ATP13A1 PE=1 SV=2 - [AT131_HUMAN]	1.05433e-07	2.15841e-08	ATP13A1
Q6P2E9	2	2	80.14	2.68891	Huh7	HLE	Enhancer of mRNA-decapping protein 4 OS=Homo sapiens GN=EDC4 PE=1 SV=1 - [EDC4_HUMAN]	7.67486e-09	1.06974e-09	EDC4
Q9UKX7	6	6	311.48	2.68723	Huh7	HLE	Nuclear pore complex protein Nup50 OS=Homo sapiens GN=NUP50 PE=1 SV=2 - [NUP50_HUMAN]	5.09909e-09	6.45946e-10	NUP50
Q53H82	2	2	95.14	2.68053	Huh7	HLE	Beta-lactamase-like protein 2 OS=Homo sapiens GN=LACTB2 PE=1 SV=2 - [LACB2_HUMAN]	1.97706e-05	7.34133e-06	LACTB2
P09874	19	19	1394.57	2.65595	Huh7	HLE	Poly [ADP-ribose] polymerase 1 OS=Homo sapiens GN=PARP1 PE=1 SV=4 - [PARP1_HUMAN]	3.87842e-07	9.36171e-08	PARP1
P39687	6	3	569.13	2.65419	Huh7	HLE	Acidic leucine-rich nuclear phosphoprotein 32 family member A OS=Homo sapiens GN=ANP32A PE=1 SV=1 - [AN32A_HUMAN]	9.94133e-09	1.41813e-09	ANP32A
Q9H074	3	3	178.23	2.63824	Huh7	HLE	Polyadenylate-binding protein-interacting protein 1 OS=Homo sapiens GN=PAIP1 PE=1 SV=1 - [PAIP1_HUMAN]	1.70145e-06	4.89745e-07	PAIP1
Q9H2M9	3	3	88.1	2.62979	Huh7	HLE	Rab3 GTPase-activating protein non-catalytic subunit OS=Homo sapiens GN=RAB3GAP2 PE=1 SV=1 - [RBGPR_HUMAN]	2.96713e-07	6.90355e-08	RAB3GAP2
Q13884	5	5	203.56	2.62837	Huh7	HLE	Beta-1-syntrophin OS=Homo sapiens GN=SNTB1 PE=1 SV=3 - [SNTB1_HUMAN]	2.50446e-06	7.48155e-07	SNTB1
Q9UN86	3	2	251.13	2.62743	Huh7	HLE	Ras GTPase-activating protein-binding protein 2 OS=Homo sapiens GN=G3BP2 PE=1 SV=2 - [G3BP2_HUMAN]	1.93061e-07	4.28169e-08	G3BP2
P30533	5	5	314.01	2.61718	Huh7	HLE	Alpha-2-macroglobulin receptor-associated protein OS=Homo sapiens GN=LRPAP1 PE=1 SV=1 - [AMRP_HUMAN]	2.97434e-07	6.93113e-08	LRPAP1
P36551	6	6	311.1	2.59644	Huh7	HLE	Coproporphyrinogen-III oxidase, mitochondrial OS=Homo sapiens GN=CPOX PE=1 SV=3 - [HEM6_HUMAN]	1.52977e-08	2.36545e-09	CPOX
Q9UBM7	3	3	153.3	2.58984	Huh7	HLE	7-dehydrocholesterol reductase OS=Homo sapiens GN=DHCR7 PE=1 SV=1 - [DHCR7_HUMAN]	7.72388e-06	2.59612e-06	DHCR7
Q07065	21	21	2318.39	2.58507	Huh7	HLE	Cytoskeleton-associated protein 4 OS=Homo sapiens GN=CKAP4 PE=1 SV=2 - [CKAP4_HUMAN]	4.64047e-08	8.41947e-09	CKAP4
P51649	2	2	64.82	2.58485	Huh7	HLE	Succinate-semialdehyde dehydrogenase, mitochondrial OS=Homo sapiens GN=ALDH5A1 PE=1 SV=2 - [SSDH_HUMAN]	3.66282e-06	1.14338e-06	ALDH5A1
P00390	11	11	750.27	2.58479	Huh7	HLE	Glutathione reductase, mitochondrial OS=Homo sapiens GN=GSR PE=1 SV=2 - [GSHR_HUMAN]	1.64751e-10	9.80731e-12	GSR
Q8TEX9	12	12	868.19	2.54836	Huh7	HLE	Importin-4 OS=Homo sapiens GN=IPO4 PE=1 SV=2 - [IPO4_HUMAN]	2.61285e-09	2.90211e-10	IPO4
Q9NUJ1	5	5	342.01	2.54286	Huh7	HLE	Abhydrolase domain-containing protein 10, mitochondrial OS=Homo sapiens GN=ABHD10 PE=1 SV=1 - [ABHDA_HUMAN]	7.10138e-06	2.37142e-06	ABHD10
P10586	2	2	61.81	2.52101	Huh7	HLE	Receptor-type tyrosine-protein phosphatase F OS=Homo sapiens GN=PTPRF PE=1 SV=2 - [PTPRF_HUMAN]	7.39185e-07	1.92912e-07	PTPRF
P09417	4	4	279.45	2.51351	Huh7	HLE	Dihydropteridine reductase OS=Homo sapiens GN=QDPR PE=1 SV=2 - [DHPR_HUMAN]	1.48301e-08	2.28777e-09	QDPR
Q14997	4	4	157.08	2.50537	Huh7	HLE	Proteasome activator complex subunit 4 OS=Homo sapiens GN=PSME4 PE=1 SV=2 - [PSME4_HUMAN]	4.62469e-07	1.14652e-07	PSME4
Q13033	3	3	198.72	2.489	Huh7	HLE	Striatin-3 OS=Homo sapiens GN=STRN3 PE=1 SV=3 - [STRN3_HUMAN]	5.16208e-07	1.29661e-07	STRN3
O00410	22	21	1209.25	2.48472	Huh7	HLE	Importin-5 OS=Homo sapiens GN=IPO5 PE=1 SV=4 - [IPO5_HUMAN]	2.25714e-08	3.71958e-09	IPO5
Q9BPW8	7	7	428.51	2.46495	Huh7	HLE	Protein NipSnap homolog 1 OS=Homo sapiens GN=NIPSNAP1 PE=1 SV=1 - [NIPS1_HUMAN]	3.28492e-08	5.75904e-09	NIPSNAP1
Q01082	62	57	4427.42	2.46326	Huh7	HLE	Spectrin beta chain, non-erythrocytic 1 OS=Homo sapiens GN=SPTBN1 PE=1 SV=2 - [SPTB2_HUMAN]	1.77091e-09	1.83013e-10	SPTBN1
P21399	5	5	208.8	2.45939	Huh7	HLE	Cytoplasmic aconitate hydratase OS=Homo sapiens GN=ACO1 PE=1 SV=3 - [ACOC_HUMAN]	1.10702e-08	1.62336e-09	ACO1
Q92734	6	5	323.16	2.44841	Huh7	HLE	Protein TFG OS=Homo sapiens GN=TFG PE=1 SV=2 - [TFG_HUMAN]	4.13119e-10	3.01405e-11	TFG
Q6UB35	11	9	598.55	2.40696	Huh7	HLE	Monofunctional C1-tetrahydrofolate synthase, mitochondrial OS=Homo sapiens GN=MTHFD1L PE=1 SV=1 - [C1TM_HUMAN]	9.56725e-09	1.36129e-09	MTHFD1L
Q15043	3	3	337.35	2.38672	Huh7	HLE	Zinc transporter ZIP14 OS=Homo sapiens GN=SLC39A14 PE=1 SV=3 - [S39AE_HUMAN]	1.64565e-07	3.57204e-08	SLC39A14
P11766	6	6	340.96	2.38254	Huh7	HLE	Alcohol dehydrogenase class-3 OS=Homo sapiens GN=ADH5 PE=1 SV=4 - [ADHX_HUMAN]	7.46922e-09	1.03024e-09	ADH5
Q8IX01	4	3	123.98	2.37783	Huh7	HLE	SURP and G-patch domain-containing protein 2 OS=Homo sapiens GN=SUGP2 PE=1 SV=2 - [SUGP2_HUMAN]	0.000182356	8.27387e-05	SUGP2
Q96C36	3	2	133.22	2.3763	Huh7	HLE	Pyrroline-5-carboxylate reductase 2 OS=Homo sapiens GN=PYCR2 PE=1 SV=1 - [P5CR2_HUMAN]	0.000340432	0.000162864	PYCR2
P54687	4	4	226.96	2.3663	Huh7	HLE	Branched-chain-amino-acid aminotransferase, cytosolic OS=Homo sapiens GN=BCAT1 PE=1 SV=3 - [BCAT1_HUMAN]	6.25577e-09	8.40158e-10	BCAT1
Q8NBQ5	4	4	384.84	2.36195	Huh7	HLE	Estradiol 17-beta-dehydrogenase 11 OS=Homo sapiens GN=HSD17B11 PE=1 SV=3 - [DHB11_HUMAN]	2.49014e-07	5.67625e-08	HSD17B11
Q92900	17	17	954.01	2.35941	Huh7	HLE	Regulator of nonsense transcripts 1 OS=Homo sapiens GN=UPF1 PE=1 SV=2 - [RENT1_HUMAN]	1.22326e-09	1.14557e-10	UPF1
Q13813	65	65	5048.19	2.35476	Huh7	HLE	Spectrin alpha chain, non-erythrocytic 1 OS=Homo sapiens GN=SPTAN1 PE=1 SV=3 - [SPTN1_HUMAN]	1.58762e-08	2.48372e-09	SPTAN1
Q13257	2	2	113.23	2.33478	Huh7	HLE	Mitotic spindle assembly checkpoint protein MAD2A OS=Homo sapiens GN=MAD2L1 PE=1 SV=1 - [MD2L1_HUMAN]	4.61395e-06	1.46709e-06	MAD2L1
P15559	6	6	402.5	2.32731	Huh7	HLE	NAD(P)H dehydrogenase [quinone] 1 OS=Homo sapiens GN=NQO1 PE=1 SV=1 - [NQO1_HUMAN]	1.66768e-12	3.14771e-14	NQO1
Q05682	6	6	406.15	2.32076	Huh7	HLE	Caldesmon OS=Homo sapiens GN=CALD1 PE=1 SV=3 - [CALD1_HUMAN]	2.98225e-06	9.11454e-07	CALD1
O00754	3	3	164.08	2.31425	Huh7	HLE	Lysosomal alpha-mannosidase OS=Homo sapiens GN=MAN2B1 PE=1 SV=3 - [MA2B1_HUMAN]	2.4754e-05	9.39845e-06	MAN2B1
Q9NRX4	3	3	113.22	2.30053	Huh7	HLE	14 kDa phosphohistidine phosphatase OS=Homo sapiens GN=PHPT1 PE=1 SV=1 - [PHP14_HUMAN]	3.69032e-07	8.82069e-08	PHPT1
Q9BTE6	2	2	70.43	2.30019	Huh7	HLE	Alanyl-tRNA editing protein Aarsd1 OS=Homo sapiens GN=AARSD1 PE=1 SV=2 - [AASD1_HUMAN]	0.000156263	6.95386e-05	AARSD1
P43487	6	6	441	2.29601	Huh7	HLE	Ran-specific GTPase-activating protein OS=Homo sapiens GN=RANBP1 PE=1 SV=1 - [RANG_HUMAN]	1.78421e-09	1.85222e-10	RANBP1
Q92520	2	2	136.87	2.28912	Huh7	HLE	Protein FAM3C OS=Homo sapiens GN=FAM3C PE=1 SV=1 - [FAM3C_HUMAN]	7.81412e-05	3.2703e-05	FAM3C
P68036	5	5	265.88	2.2834	Huh7	HLE	Ubiquitin-conjugating enzyme E2 L3 OS=Homo sapiens GN=UBE2L3 PE=1 SV=1 - [UB2L3_HUMAN]	4.6658e-07	1.15841e-07	UBE2L3
Q9Y450	2	2	82.33	2.26362	Huh7	HLE	HBS1-like protein OS=Homo sapiens GN=HBS1L PE=1 SV=1 - [HBS1L_HUMAN]	1.84278e-08	2.96316e-09	HBS1L
Q02539	4	3	324.56	2.26172	Huh7	HLE	Histone H1.1 OS=Homo sapiens GN=HIST1H1A PE=1 SV=3 - [H11_HUMAN]	0.000555392	0.000277394	HIST1H1A
O94979	17	17	987.15	2.26156	Huh7	HLE	Protein transport protein Sec31A OS=Homo sapiens GN=SEC31A PE=1 SV=3 - [SC31A_HUMAN]	6.92723e-10	5.75802e-11	SEC31A
O15127	2	2	325.8	2.25758	Huh7	HLE	Secretory carrier-associated membrane protein 2 OS=Homo sapiens GN=SCAMP2 PE=1 SV=2 - [SCAM2_HUMAN]	1.48456e-07	3.185e-08	SCAMP2
Q9BX68	4	4	216.6	2.24377	Huh7	HLE	Histidine triad nucleotide-binding protein 2, mitochondrial OS=Homo sapiens GN=HINT2 PE=1 SV=1 - [HINT2_HUMAN]	2.36248e-07	5.35952e-08	HINT2
Q9Y2Z0	4	4	172.21	2.24333	Huh7	HLE	Suppressor of G2 allele of SKP1 homolog OS=Homo sapiens GN=SUGT1 PE=1 SV=3 - [SUGT1_HUMAN]	2.2371e-07	5.05886e-08	SUGT1
P13693	4	4	424.71	2.23155	Huh7	HLE	Translationally-controlled tumor protein OS=Homo sapiens GN=TPT1 PE=1 SV=1 - [TCTP_HUMAN]	1.13518e-08	1.68526e-09	TPT1
P50453	2	2	93.63	2.22428	Huh7	HLE	Serpin B9 OS=Homo sapiens GN=SERPINB9 PE=1 SV=1 - [SPB9_HUMAN]	3.74169e-07	8.97734e-08	SERPINB9
P50895	10	10	549.55	2.22019	Huh7	HLE	Basal cell adhesion molecule OS=Homo sapiens GN=BCAM PE=1 SV=2 - [BCAM_HUMAN]	3.17576e-09	3.70343e-10	BCAM
Q13867	3	3	180.33	2.21751	Huh7	HLE	Bleomycin hydrolase OS=Homo sapiens GN=BLMH PE=1 SV=1 - [BLMH_HUMAN]	1.15917e-06	3.17799e-07	BLMH
Q9BR76	8	8	570.24	2.21337	Huh7	HLE	Coronin-1B OS=Homo sapiens GN=CORO1B PE=1 SV=1 - [COR1B_HUMAN]	1.03011e-10	5.75815e-12	CORO1B
P22392	11	5	947.89	2.20539	Huh7	HLE	Nucleoside diphosphate kinase B OS=Homo sapiens GN=NME2 PE=1 SV=1 - [NDKB_HUMAN]	1.0317e-06	2.7824e-07	NME2
P23526	19	18	1506.15	2.20303	Huh7	HLE	Adenosylhomocysteinase OS=Homo sapiens GN=AHCY PE=1 SV=4 - [SAHH_HUMAN]	1.0207e-08	1.46714e-09	AHCY
Q86U38	2	2	70.45	2.20283	Huh7	HLE	Nucleolar protein 9 OS=Homo sapiens GN=NOP9 PE=1 SV=1 - [NOP9_HUMAN]	0.00361116	0.00215097	NOP9
P51858	6	6	402.19	2.18388	Huh7	HLE	Hepatoma-derived growth factor OS=Homo sapiens GN=HDGF PE=1 SV=1 - [HDGF_HUMAN]	4.10782e-08	7.32102e-09	HDGF
P16435	16	16	1146.94	2.17838	Huh7	HLE	NADPH--cytochrome P450 reductase OS=Homo sapiens GN=POR PE=1 SV=2 - [NCPR_HUMAN]	2.85414e-09	3.22192e-10	POR
O75153	6	6	266.29	2.16834	Huh7	HLE	Clustered mitochondria protein homolog OS=Homo sapiens GN=KIAA0664 PE=1 SV=2 - [CLU_HUMAN]	1.25094e-06	3.46904e-07	KIAA0664
O43490	2	2	104.18	2.15203	Huh7	HLE	Prominin-1 OS=Homo sapiens GN=PROM1 PE=1 SV=1 - [PROM1_HUMAN]	0.00285017	0.00165941	PROM1
P55072	41	41	3321.44	2.15026	Huh7	HLE	Transitional endoplasmic reticulum ATPase OS=Homo sapiens GN=VCP PE=1 SV=4 - [TERA_HUMAN]	9.90774e-08	2.00672e-08	VCP
P07741	4	4	357.44	2.13311	Huh7	HLE	Adenine phosphoribosyltransferase OS=Homo sapiens GN=APRT PE=1 SV=2 - [APT_HUMAN]	3.10335e-09	3.57082e-10	APRT
Q14694	5	5	266.15	2.12094	Huh7	HLE	Ubiquitin carboxyl-terminal hydrolase 10 OS=Homo sapiens GN=USP10 PE=1 SV=2 - [UBP10_HUMAN]	1.33539e-08	2.04065e-09	USP10
Q9UHN6	2	2	114.2	2.11503	Huh7	HLE	Transmembrane protein 2 OS=Homo sapiens GN=TMEM2 PE=1 SV=1 - [TMEM2_HUMAN]	6.63059e-06	2.19014e-06	TMEM2
O95394	5	5	262.03	2.10385	Huh7	HLE	Phosphoacetylglucosamine mutase OS=Homo sapiens GN=PGM3 PE=1 SV=1 - [AGM1_HUMAN]	1.3105e-07	2.75894e-08	PGM3
P35580	34	25	2645.65	2.10292	Huh7	HLE	Myosin-10 OS=Homo sapiens GN=MYH10 PE=1 SV=3 - [MYH10_HUMAN]	9.87886e-08	1.9963e-08	MYH10
P35222	10	7	635.9	2.09968	Huh7	HLE	Catenin beta-1 OS=Homo sapiens GN=CTNNB1 PE=1 SV=1 - [CTNB1_HUMAN]	1.28063e-08	1.93837e-09	CTNNB1
P28288	5	5	335.82	2.09902	Huh7	HLE	ATP-binding cassette sub-family D member 3 OS=Homo sapiens GN=ABCD3 PE=1 SV=1 - [ABCD3_HUMAN]	0.000112196	4.85029e-05	ABCD3
Q96H79	3	3	81.75	2.08936	Huh7	HLE	Zinc finger CCCH-type antiviral protein 1-like OS=Homo sapiens GN=ZC3HAV1L PE=1 SV=2 - [ZCCHL_HUMAN]	2.51979e-09	2.75302e-10	ZC3HAV1L
Q96RP9	3	3	97.15	2.07222	Huh7	HLE	Elongation factor G, mitochondrial OS=Homo sapiens GN=GFM1 PE=1 SV=2 - [EFGM_HUMAN]	1.98588e-06	5.79546e-07	GFM1
Q99805	2	2	72.34	2.06903	Huh7	HLE	Transmembrane 9 superfamily member 2 OS=Homo sapiens GN=TM9SF2 PE=1 SV=1 - [TM9S2_HUMAN]	0.000259372	0.00012173	TM9SF2
A0MZ66	2	2	108.49	2.06823	Huh7	HLE	Shootin-1 OS=Homo sapiens GN=KIAA1598 PE=1 SV=4 - [SHOT1_HUMAN]	2.91707e-05	1.12659e-05	KIAA1598
Q9Y6M1	7	5	486.59	2.0565	Huh7	HLE	Insulin-like growth factor 2 mRNA-binding protein 2 OS=Homo sapiens GN=IGF2BP2 PE=1 SV=2 - [IF2B2_HUMAN]	1.1447e-06	3.12871e-07	IGF2BP2
O15260	3	3	378.35	2.04807	Huh7	HLE	Surfeit locus protein 4 OS=Homo sapiens GN=SURF4 PE=1 SV=3 - [SURF4_HUMAN]	3.732e-05	1.47519e-05	SURF4
P34897	23	22	1713.5	2.04617	Huh7	HLE	Serine hydroxymethyltransferase, mitochondrial OS=Homo sapiens GN=SHMT2 PE=1 SV=3 - [GLYM_HUMAN]	2.34346e-08	3.88734e-09	SHMT2
P53007	6	6	346.98	2.04325	Huh7	HLE	Tricarboxylate transport protein, mitochondrial OS=Homo sapiens GN=SLC25A1 PE=1 SV=2 - [TXTP_HUMAN]	1.88912e-05	6.95991e-06	SLC25A1
P52758	3	3	173.2	2.04028	Huh7	HLE	Ribonuclease UK114 OS=Homo sapiens GN=HRSP12 PE=1 SV=1 - [UK114_HUMAN]	1.15917e-06	3.18087e-07	HRSP12
P30520	5	5	441.76	2.02972	Huh7	HLE	Adenylosuccinate synthetase isozyme 2 OS=Homo sapiens GN=ADSS PE=1 SV=3 - [PURA2_HUMAN]	1.34998e-07	2.86685e-08	ADSS
Q92598	23	22	1414.2	2.02364	Huh7	HLE	Heat shock protein 105 kDa OS=Homo sapiens GN=HSPH1 PE=1 SV=1 - [HS105_HUMAN]	6.96825e-08	1.32536e-08	HSPH1
P51532	5	4	231.29	2.02135	Huh7	HLE	Transcription activator BRG1 OS=Homo sapiens GN=SMARCA4 PE=1 SV=2 - [SMCA4_HUMAN]	9.60939e-08	1.92249e-08	SMARCA4
Q9NZ01	5	5	302.94	2.01636	Huh7	HLE	Trans-2,3-enoyl-CoA reductase OS=Homo sapiens GN=TECR PE=1 SV=1 - [TECR_HUMAN]	7.63732e-06	2.56148e-06	TECR
P61088	5	5	217.31	2.00641	Huh7	HLE	Ubiquitin-conjugating enzyme E2 N OS=Homo sapiens GN=UBE2N PE=1 SV=1 - [UBE2N_HUMAN]	6.33597e-07	1.62305e-07	UBE2N
Q04637	19	18	1269.16	1.98709	Huh7	HLE	Eukaryotic translation initiation factor 4 gamma 1 OS=Homo sapiens GN=EIF4G1 PE=1 SV=4 - [IF4G1_HUMAN]	2.68197e-07	6.16221e-08	EIF4G1
P53396	33	32	2283.27	1.98363	Huh7	HLE	ATP-citrate synthase OS=Homo sapiens GN=ACLY PE=1 SV=3 - [ACLY_HUMAN]	3.589e-11	1.49813e-12	ACLY
Q01105	6	6	401.61	1.98196	Huh7	HLE	Protein SET OS=Homo sapiens GN=SET PE=1 SV=3 - [SET_HUMAN]	2.43697e-06	7.25341e-07	SET
P54727	3	3	300.24	1.98171	Huh7	HLE	UV excision repair protein RAD23 homolog B OS=Homo sapiens GN=RAD23B PE=1 SV=1 - [RD23B_HUMAN]	9.10402e-05	3.85971e-05	RAD23B
O00762	2	2	111.98	1.98014	Huh7	HLE	Ubiquitin-conjugating enzyme E2 C OS=Homo sapiens GN=UBE2C PE=1 SV=1 - [UBE2C_HUMAN]	8.10215e-08	1.57338e-08	UBE2C
Q96CN7	6	6	364.9	1.97625	Huh7	HLE	Isochorismatase domain-containing protein 1 OS=Homo sapiens GN=ISOC1 PE=1 SV=3 - [ISOC1_HUMAN]	5.58347e-09	7.29601e-10	ISOC1
Q15046	9	8	484.75	1.96985	Huh7	HLE	Lysine--tRNA ligase OS=Homo sapiens GN=KARS PE=1 SV=3 - [SYK_HUMAN]	3.63442e-08	6.39816e-09	KARS
P54886	17	16	1125.6	1.95538	Huh7	HLE	Delta-1-pyrroline-5-carboxylate synthase OS=Homo sapiens GN=ALDH18A1 PE=1 SV=2 - [P5CS_HUMAN]	1.18376e-08	1.76597e-09	ALDH18A1
P13639	43	42	3845.03	1.94435	Huh7	HLE	Elongation factor 2 OS=Homo sapiens GN=EEF2 PE=1 SV=4 - [EF2_HUMAN]	1.63571e-06	4.66339e-07	EEF2
P36871	13	13	610.56	1.93854	Huh7	HLE	Phosphoglucomutase-1 OS=Homo sapiens GN=PGM1 PE=1 SV=3 - [PGM1_HUMAN]	3.68771e-08	6.50537e-09	PGM1
P24534	9	9	601.76	1.93602	Huh7	HLE	Elongation factor 1-beta OS=Homo sapiens GN=EEF1B2 PE=1 SV=3 - [EF1B_HUMAN]	2.23825e-09	2.38043e-10	EEF1B2
P60842	22	11	1867.53	1.93091	Huh7	HLE	Eukaryotic initiation factor 4A-I OS=Homo sapiens GN=EIF4A1 PE=1 SV=1 - [IF4A1_HUMAN]	5.59665e-08	1.04823e-08	EIF4A1
P29144	5	5	224.66	1.92853	Huh7	HLE	Tripeptidyl-peptidase 2 OS=Homo sapiens GN=TPP2 PE=1 SV=4 - [TPP2_HUMAN]	7.15331e-08	1.36835e-08	TPP2
Q16881	7	7	416.29	1.91842	Huh7	HLE	Thioredoxin reductase 1, cytoplasmic OS=Homo sapiens GN=TXNRD1 PE=1 SV=3 - [TRXR1_HUMAN]	3.38493e-10	2.38358e-11	TXNRD1
Q9NUQ6	3	3	118.03	1.90792	Huh7	HLE	SPATS2-like protein OS=Homo sapiens GN=SPATS2L PE=1 SV=2 - [SPS2L_HUMAN]	1.16918e-06	3.2126e-07	SPATS2L
Q10713	3	3	208.21	1.90791	Huh7	HLE	Mitochondrial-processing peptidase subunit alpha OS=Homo sapiens GN=PMPCA PE=1 SV=2 - [MPPA_HUMAN]	3.31606e-06	1.0219e-06	PMPCA
O43175	19	19	1413.58	1.90326	Huh7	HLE	D-3-phosphoglycerate dehydrogenase OS=Homo sapiens GN=PHGDH PE=1 SV=4 - [SERA_HUMAN]	1.82512e-06	5.29317e-07	PHGDH
Q9H993	2	2	99.79	1.90057	Huh7	HLE	UPF0364 protein C6orf211 OS=Homo sapiens GN=C6orf211 PE=1 SV=1 - [CF211_HUMAN]	6.52164e-10	5.34021e-11	C6orf211
O95163	5	5	233.62	1.89334	Huh7	HLE	Elongator complex protein 1 OS=Homo sapiens GN=IKBKAP PE=1 SV=3 - [ELP1_HUMAN]	2.32548e-05	8.7475e-06	IKBKAP
P63241	6	3	563.08	1.8901	Huh7	HLE	Eukaryotic translation initiation factor 5A-1 OS=Homo sapiens GN=EIF5A PE=1 SV=2 - [IF5A1_HUMAN]	0.000122044	5.32033e-05	EIF5A
O00625	3	3	156.25	1.88872	Huh7	HLE	Pirin OS=Homo sapiens GN=PIR PE=1 SV=1 - [PIR_HUMAN]	0.0012513	0.000671749	PIR
P49902	3	3	147.63	1.88712	Huh7	HLE	Cytosolic purine 5'-nucleotidase OS=Homo sapiens GN=NT5C2 PE=1 SV=1 - [5NTC_HUMAN]	6.96223e-08	1.32113e-08	NT5C2
Q96C23	2	2	79.46	1.88165	Huh7	HLE	Aldose 1-epimerase OS=Homo sapiens GN=GALM PE=1 SV=1 - [GALM_HUMAN]	8.66048e-05	3.64652e-05	GALM
O43615	3	3	174.94	1.88113	Huh7	HLE	Mitochondrial import inner membrane translocase subunit TIM44 OS=Homo sapiens GN=TIMM44 PE=1 SV=2 - [TIM44_HUMAN]	8.28612e-05	3.47686e-05	TIMM44
O95861	5	5	239.71	1.87157	Huh7	HLE	3'(2'),5'-bisphosphate nucleotidase 1 OS=Homo sapiens GN=BPNT1 PE=1 SV=1 - [BPNT1_HUMAN]	2.87803e-08	4.90989e-09	BPNT1
Q01469	5	5	355.54	1.87105	Huh7	HLE	Fatty acid-binding protein, epidermal OS=Homo sapiens GN=FABP5 PE=1 SV=3 - [FABP5_HUMAN]	3.84518e-06	1.20589e-06	FABP5
Q02750	3	3	197.65	1.87098	Huh7	HLE	Dual specificity mitogen-activated protein kinase kinase 1 OS=Homo sapiens GN=MAP2K1 PE=1 SV=2 - [MP2K1_HUMAN]	3.62087e-07	8.63488e-08	MAP2K1
Q92917	2	2	77.15	1.86863	Huh7	HLE	G patch domain and KOW motifs-containing protein OS=Homo sapiens GN=GPKOW PE=1 SV=2 - [GPKOW_HUMAN]	0.00640894	0.00398029	GPKOW
P30566	5	5	220.1	1.86517	Huh7	HLE	Adenylosuccinate lyase OS=Homo sapiens GN=ADSL PE=1 SV=2 - [PUR8_HUMAN]	3.28075e-07	7.68088e-08	ADSL
P49257	5	5	378.65	1.86078	Huh7	HLE	Protein ERGIC-53 OS=Homo sapiens GN=LMAN1 PE=1 SV=2 - [LMAN1_HUMAN]	2.3629e-06	7.01578e-07	LMAN1
P02786	16	15	1056.32	1.86066	Huh7	HLE	Transferrin receptor protein 1 OS=Homo sapiens GN=TFRC PE=1 SV=2 - [TFR1_HUMAN]	2.87619e-06	8.76951e-07	TFRC
Q9NU22	2	2	88.64	1.86035	Huh7	HLE	Midasin OS=Homo sapiens GN=MDN1 PE=1 SV=2 - [MDN1_HUMAN]	0.00364128	0.00217287	MDN1
Q9H2U2	6	5	293.3	1.85996	Huh7	HLE	Inorganic pyrophosphatase 2, mitochondrial OS=Homo sapiens GN=PPA2 PE=1 SV=2 - [IPYR2_HUMAN]	2.7705e-05	1.06395e-05	PPA2
Q9ULT8	4	4	161.54	1.85907	Huh7	HLE	E3 ubiquitin-protein ligase HECTD1 OS=Homo sapiens GN=HECTD1 PE=1 SV=3 - [HECD1_HUMAN]	5.90811e-06	1.93863e-06	HECTD1
Q9NR45	6	6	359	1.85811	Huh7	HLE	Sialic acid synthase OS=Homo sapiens GN=NANS PE=1 SV=2 - [SIAS_HUMAN]	1.75077e-08	2.77708e-09	NANS
Q7Z417	3	3	122.06	1.85106	Huh7	HLE	Nuclear fragile X mental retardation-interacting protein 2 OS=Homo sapiens GN=NUFIP2 PE=1 SV=1 - [NUFP2_HUMAN]	5.26608e-09	6.78569e-10	NUFIP2
Q9Y490	60	60	4431.02	1.85097	Huh7	HLE	Talin-1 OS=Homo sapiens GN=TLN1 PE=1 SV=3 - [TLN1_HUMAN]	4.33841e-07	1.06452e-07	TLN1
P21291	2	2	98.16	1.85067	Huh7	HLE	Cysteine and glycine-rich protein 1 OS=Homo sapiens GN=CSRP1 PE=1 SV=3 - [CSRP1_HUMAN]	5.46047e-06	1.77589e-06	CSRP1
O00743	3	3	198.84	1.84891	Huh7	HLE	Serine/threonine-protein phosphatase 6 catalytic subunit OS=Homo sapiens GN=PPP6C PE=1 SV=1 - [PPP6_HUMAN]	1.24813e-06	3.45558e-07	PPP6C
P55957	2	2	73.36	1.83836	Huh7	HLE	BH3-interacting domain death agonist OS=Homo sapiens GN=BID PE=1 SV=1 - [BID_HUMAN]	0.00128241	0.000689384	BID
P61960	2	2	114.34	1.82612	Huh7	HLE	Ubiquitin-fold modifier 1 OS=Homo sapiens GN=UFM1 PE=1 SV=1 - [UFM1_HUMAN]	1.27446e-07	2.66919e-08	UFM1
P23229	4	4	180.55	1.82182	Huh7	HLE	Integrin alpha-6 OS=Homo sapiens GN=ITGA6 PE=1 SV=5 - [ITA6_HUMAN]	2.50755e-05	9.54603e-06	ITGA6
Q8N8S7	3	3	196.84	1.81292	Huh7	HLE	Protein enabled homolog OS=Homo sapiens GN=ENAH PE=1 SV=2 - [ENAH_HUMAN]	1.11695e-05	3.87589e-06	ENAH
Q9NTK5	6	6	375.56	1.80244	Huh7	HLE	Obg-like ATPase 1 OS=Homo sapiens GN=OLA1 PE=1 SV=2 - [OLA1_HUMAN]	6.99571e-06	2.32852e-06	OLA1
Q9UBQ7	3	3	224.33	1.79758	Huh7	HLE	Glyoxylate reductase/hydroxypyruvate reductase OS=Homo sapiens GN=GRHPR PE=1 SV=1 - [GRHPR_HUMAN]	2.57287e-07	5.87417e-08	GRHPR
O95758	5	2	223.39	1.78734	Huh7	HLE	Polypyrimidine tract-binding protein 3 OS=Homo sapiens GN=PTBP3 PE=1 SV=2 - [PTBP3_HUMAN]	0.00185519	0.00102355	PTBP3
Q9HCN8	3	3	111.39	1.78509	Huh7	HLE	Stromal cell-derived factor 2-like protein 1 OS=Homo sapiens GN=SDF2L1 PE=1 SV=2 - [SDF2L_HUMAN]	0.000218781	0.000101012	SDF2L1
O95573	15	12	1225.04	1.7837	Huh7	HLE	Long-chain-fatty-acid--CoA ligase 3 OS=Homo sapiens GN=ACSL3 PE=1 SV=3 - [ACSL3_HUMAN]	4.61613e-07	1.14272e-07	ACSL3
P17174	13	12	920.82	1.77688	Huh7	HLE	Aspartate aminotransferase, cytoplasmic OS=Homo sapiens GN=GOT1 PE=1 SV=3 - [AATC_HUMAN]	3.84372e-07	9.264e-08	GOT1
Q99829	11	11	735.09	1.77551	Huh7	HLE	Copine-1 OS=Homo sapiens GN=CPNE1 PE=1 SV=1 - [CPNE1_HUMAN]	3.02399e-10	2.01965e-11	CPNE1
Q7KZF4	26	26	1742.53	1.77353	Huh7	HLE	Staphylococcal nuclease domain-containing protein 1 OS=Homo sapiens GN=SND1 PE=1 SV=1 - [SND1_HUMAN]	9.05566e-08	1.79653e-08	SND1
O15067	10	10	586.26	1.77105	Huh7	HLE	Phosphoribosylformylglycinamidine synthase OS=Homo sapiens GN=PFAS PE=1 SV=4 - [PUR4_HUMAN]	1.9875e-05	7.3873e-06	PFAS
Q9BS26	4	4	160.81	1.76482	Huh7	HLE	Endoplasmic reticulum resident protein 44 OS=Homo sapiens GN=ERP44 PE=1 SV=1 - [ERP44_HUMAN]	4.59943e-06	1.45979e-06	ERP44
P50502	7	2	495.88	1.7631	Huh7	HLE	Hsc70-interacting protein OS=Homo sapiens GN=ST13 PE=1 SV=2 - [F10A1_HUMAN]	5.05775e-05	2.04696e-05	ST13
Q9H6F5	3	3	125.96	1.76122	Huh7	HLE	Coiled-coil domain-containing protein 86 OS=Homo sapiens GN=CCDC86 PE=1 SV=1 - [CCD86_HUMAN]	2.60453e-06	7.81832e-07	CCDC86
Q9H8Y8	4	4	354.61	1.7547	Huh7	HLE	Golgi reassembly-stacking protein 2 OS=Homo sapiens GN=GORASP2 PE=1 SV=3 - [GORS2_HUMAN]	1.84878e-07	4.07336e-08	GORASP2
Q96EY8	2	2	107.91	1.74584	Huh7	HLE	Cob(I)yrinic acid a,c-diamide adenosyltransferase, mitochondrial OS=Homo sapiens GN=MMAB PE=1 SV=1 - [MMAB_HUMAN]	6.71199e-05	2.77738e-05	MMAB
P35573	2	2	46.2	1.74561	Huh7	HLE	Glycogen debranching enzyme OS=Homo sapiens GN=AGL PE=1 SV=3 - [GDE_HUMAN]	0.000316048	0.000150395	AGL
O96019	3	3	190.87	1.74249	Huh7	HLE	Actin-like protein 6A OS=Homo sapiens GN=ACTL6A PE=1 SV=1 - [ACL6A_HUMAN]	0.000460181	0.000226732	ACTL6A
P10599	8	8	548.15	1.72882	Huh7	HLE	Thioredoxin OS=Homo sapiens GN=TXN PE=1 SV=3 - [THIO_HUMAN]	0.000327145	0.000156032	TXN
P13804	14	14	969.57	1.72513	Huh7	HLE	Electron transfer flavoprotein subunit alpha, mitochondrial OS=Homo sapiens GN=ETFA PE=1 SV=1 - [ETFA_HUMAN]	4.27181e-07	1.04353e-07	ETFA
P04179	3	3	211.16	1.7228	Huh7	HLE	Superoxide dismutase [Mn], mitochondrial OS=Homo sapiens GN=SOD2 PE=1 SV=2 - [SODM_HUMAN]	2.64773e-06	7.97683e-07	SOD2
Q9UNF0	5	5	263.6	1.71479	Huh7	HLE	Protein kinase C and casein kinase substrate in neurons protein 2 OS=Homo sapiens GN=PACSIN2 PE=1 SV=2 - [PACN2_HUMAN]	5.50043e-06	1.79088e-06	PACSIN2
Q9BXW7	2	2	127.96	1.71312	Huh7	HLE	Cat eye syndrome critical region protein 5 OS=Homo sapiens GN=CECR5 PE=1 SV=1 - [CECR5_HUMAN]	1.03264e-05	3.57206e-06	CECR5
Q13177	9	9	494.76	1.71244	Huh7	HLE	Serine/threonine-protein kinase PAK 2 OS=Homo sapiens GN=PAK2 PE=1 SV=3 - [PAK2_HUMAN]	1.40768e-07	3.0044e-08	PAK2
P05026	3	2	158.95	1.70942	Huh7	HLE	Sodium/potassium-transporting ATPase subunit beta-1 OS=Homo sapiens GN=ATP1B1 PE=1 SV=1 - [AT1B1_HUMAN]	0.000128003	5.62191e-05	ATP1B1
P49588	28	27	2186.27	1.70454	Huh7	HLE	Alanine--tRNA ligase, cytoplasmic OS=Homo sapiens GN=AARS PE=1 SV=2 - [SYAC_HUMAN]	5.39856e-07	1.35993e-07	AARS
Q6YN16	5	5	255.26	1.68493	Huh7	HLE	Hydroxysteroid dehydrogenase-like protein 2 OS=Homo sapiens GN=HSDL2 PE=1 SV=1 - [HSDL2_HUMAN]	1.18569e-08	1.77316e-09	HSDL2
Q9Y5L0	4	3	137.3	1.68129	Huh7	HLE	Transportin-3 OS=Homo sapiens GN=TNPO3 PE=1 SV=3 - [TNPO3_HUMAN]	2.44741e-05	9.2655e-06	TNPO3
P11388	17	15	935.84	1.6769	Huh7	HLE	DNA topoisomerase 2-alpha OS=Homo sapiens GN=TOP2A PE=1 SV=3 - [TOP2A_HUMAN]	0.00330733	0.00195319	TOP2A
P07900	36	21	3696.64	1.67036	Huh7	HLE	Heat shock protein HSP 90-alpha OS=Homo sapiens GN=HSP90AA1 PE=1 SV=5 - [HS90A_HUMAN]	1.25006e-07	2.60902e-08	HSP90AA1
Q10567	10	6	423.07	1.669	Huh7	HLE	AP-1 complex subunit beta-1 OS=Homo sapiens GN=AP1B1 PE=1 SV=2 - [AP1B1_HUMAN]	3.88991e-05	1.54749e-05	AP1B1
P02679	5	5	263.21	1.6674	Huh7	HLE	Fibrinogen gamma chain OS=Homo sapiens GN=FGG PE=1 SV=3 - [FIBG_HUMAN]	2.80279e-07	6.46015e-08	FGG
P61970	5	5	226.2	1.66711	Huh7	HLE	Nuclear transport factor 2 OS=Homo sapiens GN=NUTF2 PE=1 SV=1 - [NTF2_HUMAN]	2.75186e-08	4.67466e-09	NUTF2
Q9BRA2	4	4	328.27	1.66687	Huh7	HLE	Thioredoxin domain-containing protein 17 OS=Homo sapiens GN=TXNDC17 PE=1 SV=1 - [TXD17_HUMAN]	2.44896e-06	7.29798e-07	TXNDC17
Q13557	6	5	374.32	1.66033	Huh7	HLE	Calcium/calmodulin-dependent protein kinase type II subunit delta OS=Homo sapiens GN=CAMK2D PE=1 SV=3 - [KCC2D_HUMAN]	7.02645e-09	9.64065e-10	CAMK2D
P68371	46	5	4381.6	1.65879	Huh7	HLE	Tubulin beta-4B chain OS=Homo sapiens GN=TUBB4B PE=1 SV=1 - [TBB4B_HUMAN]	6.67253e-07	1.7196e-07	TUBB4B
O00116	11	11	621.16	1.65554	Huh7	HLE	Alkyldihydroxyacetonephosphate synthase, peroxisomal OS=Homo sapiens GN=AGPS PE=1 SV=1 - [ADAS_HUMAN]	2.2631e-08	3.73761e-09	AGPS
Q92616	18	17	699.06	1.6529	Huh7	HLE	Translational activator GCN1 OS=Homo sapiens GN=GCN1L1 PE=1 SV=6 - [GCN1L_HUMAN]	1.12614e-08	1.66366e-09	GCN1L1
Q9Y383	6	5	316.34	1.65004	Huh7	HLE	Putative RNA-binding protein Luc7-like 2 OS=Homo sapiens GN=LUC7L2 PE=1 SV=2 - [LC7L2_HUMAN]	5.47471e-05	2.22764e-05	LUC7L2
Q9BY77	2	2	119.42	1.64312	Huh7	HLE	Polymerase delta-interacting protein 3 OS=Homo sapiens GN=POLDIP3 PE=1 SV=2 - [PDIP3_HUMAN]	0.00227965	0.00128246	POLDIP3
Q9UBS4	4	4	248.41	1.6406	Huh7	HLE	DnaJ homolog subfamily B member 11 OS=Homo sapiens GN=DNAJB11 PE=1 SV=1 - [DJB11_HUMAN]	9.93698e-05	4.2381e-05	DNAJB11
P07099	4	4	159.45	1.63958	Huh7	HLE	Epoxide hydrolase 1 OS=Homo sapiens GN=EPHX1 PE=1 SV=1 - [HYEP_HUMAN]	3.56791e-05	1.40385e-05	EPHX1
Q9UI10	2	2	118.22	1.63637	Huh7	HLE	Translation initiation factor eIF-2B subunit delta OS=Homo sapiens GN=EIF2B4 PE=1 SV=2 - [EI2BD_HUMAN]	7.44589e-05	3.10538e-05	EIF2B4
O94776	4	4	171.08	1.6302	Huh7	HLE	Metastasis-associated protein MTA2 OS=Homo sapiens GN=MTA2 PE=1 SV=1 - [MTA2_HUMAN]	0.00217331	0.00121958	MTA2
O75976	4	4	188.04	1.62896	Huh7	HLE	Carboxypeptidase D OS=Homo sapiens GN=CPD PE=1 SV=2 - [CBPD_HUMAN]	0.000129077	5.67378e-05	CPD
Q7Z434	2	2	112.21	1.62786	Huh7	HLE	Mitochondrial antiviral-signaling protein OS=Homo sapiens GN=MAVS PE=1 SV=2 - [MAVS_HUMAN]	0.015597	0.0103603	MAVS
P49903	3	3	119.69	1.62713	Huh7	HLE	Selenide, water dikinase 1 OS=Homo sapiens GN=SEPHS1 PE=1 SV=2 - [SPS1_HUMAN]	5.31826e-06	1.72771e-06	SEPHS1
P55735	6	6	361.06	1.62103	Huh7	HLE	Protein SEC13 homolog OS=Homo sapiens GN=SEC13 PE=1 SV=3 - [SEC13_HUMAN]	0.000267764	0.000126155	SEC13
Q9BQ52	4	3	151.69	1.62031	Huh7	HLE	Zinc phosphodiesterase ELAC protein 2 OS=Homo sapiens GN=ELAC2 PE=1 SV=2 - [RNZ2_HUMAN]	0.00112791	0.000600186	ELAC2
Q15813	2	2	84.19	1.61791	Huh7	HLE	Tubulin-specific chaperone E OS=Homo sapiens GN=TBCE PE=1 SV=1 - [TBCE_HUMAN]	6.82379e-05	2.82611e-05	TBCE
O75439	6	6	495.81	1.61176	Huh7	HLE	Mitochondrial-processing peptidase subunit beta OS=Homo sapiens GN=PMPCB PE=1 SV=2 - [MPPB_HUMAN]	1.51707e-05	5.42953e-06	PMPCB
Q99615	3	3	191.74	1.60809	Huh7	HLE	DnaJ homolog subfamily C member 7 OS=Homo sapiens GN=DNAJC7 PE=1 SV=2 - [DNJC7_HUMAN]	3.80565e-05	1.50707e-05	DNAJC7
Q7Z739	2	2	50.86	1.60768	Huh7	HLE	YTH domain family protein 3 OS=Homo sapiens GN=YTHDF3 PE=1 SV=1 - [YTHD3_HUMAN]	0.0023829	0.00135276	YTHDF3
P48147	5	4	284.03	1.6063	Huh7	HLE	Prolyl endopeptidase OS=Homo sapiens GN=PREP PE=1 SV=2 - [PPCE_HUMAN]	1.68522e-06	4.83239e-07	PREP
Q9BQG0	15	15	980.59	1.59981	Huh7	HLE	Myb-binding protein 1A OS=Homo sapiens GN=MYBBP1A PE=1 SV=2 - [MBB1A_HUMAN]	0.0001691	7.57419e-05	MYBBP1A
P53999	4	3	268.31	1.59821	Huh7	HLE	Activated RNA polymerase II transcriptional coactivator p15 OS=Homo sapiens GN=SUB1 PE=1 SV=3 - [TCP4_HUMAN]	1.79582e-05	6.56402e-06	SUB1
Q9UN81	2	2	135.13	1.59773	Huh7	HLE	LINE-1 retrotransposable element ORF1 protein OS=Homo sapiens GN=L1RE1 PE=1 SV=1 - [LORF1_HUMAN]	0.000450378	0.000221511	L1RE1
Q00341	22	22	1337	1.59424	Huh7	HLE	Vigilin OS=Homo sapiens GN=HDLBP PE=1 SV=2 - [VIGLN_HUMAN]	3.2249e-08	5.6304e-09	HDLBP
P14735	5	5	193.07	1.5862	Huh7	HLE	Insulin-degrading enzyme OS=Homo sapiens GN=IDE PE=1 SV=4 - [IDE_HUMAN]	9.03524e-05	3.82399e-05	IDE
Q15257	3	3	103.76	1.58541	Huh7	HLE	Serine/threonine-protein phosphatase 2A activator OS=Homo sapiens GN=PPP2R4 PE=1 SV=3 - [PTPA_HUMAN]	2.67723e-07	6.13188e-08	PPP2R4
P27105	4	4	305.43	1.58531	Huh7	HLE	Erythrocyte band 7 integral membrane protein OS=Homo sapiens GN=STOM PE=1 SV=3 - [STOM_HUMAN]	0.000965505	0.000506759	STOM
P12955	7	7	343.98	1.5851	Huh7	HLE	Xaa-Pro dipeptidase OS=Homo sapiens GN=PEPD PE=1 SV=3 - [PEPD_HUMAN]	0.000174657	7.88018e-05	PD
Q16851	8	8	488.38	1.58207	Huh7	HLE	UTP--glucose-1-phosphate uridylyltransferase OS=Homo sapiens GN=UGP2 PE=1 SV=5 - [UGPA_HUMAN]	2.68133e-07	6.151e-08	UGP2
P39748	9	9	558.31	1.57556	Huh7	HLE	Flap endonuclease 1 OS=Homo sapiens GN=FEN1 PE=1 SV=1 - [FEN1_HUMAN]	1.04407e-06	2.82713e-07	FEN1
P28482	9	9	535.59	1.57422	Huh7	HLE	Mitogen-activated protein kinase 1 OS=Homo sapiens GN=MAPK1 PE=1 SV=3 - [MK01_HUMAN]	4.44258e-08	8.01438e-09	MAPK1
P61024	2	2	113.92	1.5712	Huh7	HLE	Cyclin-dependent kinases regulatory subunit 1 OS=Homo sapiens GN=CKS1B PE=1 SV=1 - [CKS1_HUMAN]	0.00288047	0.0016781	CKS1B
P06744	13	13	1054.59	1.56938	Huh7	HLE	Glucose-6-phosphate isomerase OS=Homo sapiens GN=GPI PE=1 SV=4 - [G6PI_HUMAN]	4.94738e-08	9.15848e-09	GPI
Q9NYU2	16	16	1026.81	1.56825	Huh7	HLE	UDP-glucose:glycoprotein glucosyltransferase 1 OS=Homo sapiens GN=UGGT1 PE=1 SV=3 - [UGGG1_HUMAN]	2.53154e-08	4.22689e-09	UGGT1
P09972	6	4	596.31	1.5676	Huh7	HLE	Fructose-bisphosphate aldolase C OS=Homo sapiens GN=ALDOC PE=1 SV=2 - [ALDOC_HUMAN]	0.000462056	0.000228093	ALDOC
P38117	11	11	945.63	1.56436	Huh7	HLE	Electron transfer flavoprotein subunit beta OS=Homo sapiens GN=ETFB PE=1 SV=3 - [ETFB_HUMAN]	3.07719e-05	1.19513e-05	ETFB
P13667	20	20	1325.99	1.56077	Huh7	HLE	Protein disulfide-isomerase A4 OS=Homo sapiens GN=PDIA4 PE=1 SV=2 - [PDIA4_HUMAN]	3.82758e-05	1.51714e-05	PDIA4
O14579	8	8	413.14	1.55937	Huh7	HLE	Coatomer subunit epsilon OS=Homo sapiens GN=COPE PE=1 SV=3 - [COPE_HUMAN]	6.58682e-06	2.17329e-06	CO
Q96A49	5	5	299.2	1.5566	Huh7	HLE	Synapse-associated protein 1 OS=Homo sapiens GN=SYAP1 PE=1 SV=1 - [SYAP1_HUMAN]	8.34271e-06	2.82532e-06	SYAP1
Q9HC38	4	4	174.94	1.5497	Huh7	HLE	Glyoxalase domain-containing protein 4 OS=Homo sapiens GN=GLOD4 PE=1 SV=1 - [GLOD4_HUMAN]	0.000441398	0.000216504	GLOD4
Q9NZZ3	2	2	96.39	1.54791	Huh7	HLE	Charged multivesicular body protein 5 OS=Homo sapiens GN=CHMP5 PE=1 SV=1 - [CHMP5_HUMAN]	0.000222167	0.000102656	CHMP5
O00461	2	2	129.35	1.54191	Huh7	HLE	Golgi integral membrane protein 4 OS=Homo sapiens GN=GOLIM4 PE=1 SV=1 - [GOLI4_HUMAN]	0.0109327	0.00704655	GOLIM4
P15954	3	3	117.42	1.54118	Huh7	HLE	Cytochrome c oxidase subunit 7C, mitochondrial OS=Homo sapiens GN=COX7C PE=1 SV=1 - [COX7C_HUMAN]	3.56791e-05	1.40265e-05	COX7C
Q8WWM7	2	2	47.6	1.54002	Huh7	HLE	Ataxin-2-like protein OS=Homo sapiens GN=ATXN2L PE=1 SV=2 - [ATX2L_HUMAN]	8.21046e-05	3.44214e-05	ATXN2L
P35611	8	8	414.63	1.53533	Huh7	HLE	Alpha-adducin OS=Homo sapiens GN=ADD1 PE=1 SV=2 - [ADDA_HUMAN]	6.99038e-08	1.33211e-08	ADD1
P41252	21	21	1244.42	1.53383	Huh7	HLE	Isoleucine--tRNA ligase, cytoplasmic OS=Homo sapiens GN=IARS PE=1 SV=2 - [SYIC_HUMAN]	5.02355e-06	1.61556e-06	IARS
O60828	2	2	79.25	1.53247	Huh7	HLE	Polyglutamine-binding protein 1 OS=Homo sapiens GN=PQBP1 PE=1 SV=1 - [PQBP1_HUMAN]	0.000327468	0.000156424	PQBP1
O60739	2	2	89.24	1.53018	Huh7	HLE	Eukaryotic translation initiation factor 1b OS=Homo sapiens GN=EIF1B PE=1 SV=2 - [EIF1B_HUMAN]	5.54996e-05	2.26027e-05	EIF1B
Q15437	3	2	166.39	1.52416	Huh7	HLE	Protein transport protein Sec23B OS=Homo sapiens GN=SEC23B PE=1 SV=2 - [SC23B_HUMAN]	0.00397349	0.00239275	SEC23B
Q13526	4	3	170.51	1.52221	Huh7	HLE	Peptidyl-prolyl cis-trans isomerase NIMA-interacting 1 OS=Homo sapiens GN=PIN1 PE=1 SV=1 - [PIN1_HUMAN]	0.00121434	0.000649706	PIN1
Q14240	13	2	672.03	1.52186	Huh7	HLE	Eukaryotic initiation factor 4A-II OS=Homo sapiens GN=EIF4A2 PE=1 SV=2 - [IF4A2_HUMAN]	0.01707	0.0114316	EIF4A2
P84085	8	2	530.9	1.52143	Huh7	HLE	ADP-ribosylation factor 5 OS=Homo sapiens GN=ARF5 PE=1 SV=2 - [ARF5_HUMAN]	0.0118985	0.00770922	ARF5
Q9NUU7	6	6	350.06	1.5212	Huh7	HLE	ATP-dependent RNA helicase DDX19A OS=Homo sapiens GN=DDX19A PE=1 SV=1 - [DD19A_HUMAN]	2.80377e-05	1.07775e-05	DDX19A
Q9Y6H1	4	4	171.65	1.52113	Huh7	HLE	Coiled-coil-helix-coiled-coil-helix domain-containing protein 2, mitochondrial OS=Homo sapiens GN=CHCHD2 PE=1 SV=1 - [CHCH2_HUMAN]	6.52545e-05	2.69071e-05	CHCHD2
Q13724	3	3	166.59	1.51918	Huh7	HLE	Mannosyl-oligosaccharide glucosidase OS=Homo sapiens GN=MOGS PE=1 SV=5 - [MOGS_HUMAN]	1.9351e-05	7.16445e-06	MOGS
P43490	5	5	178.5	1.51885	Huh7	HLE	Nicotinamide phosphoribosyltransferase OS=Homo sapiens GN=NAMPT PE=1 SV=1 - [NAMPT_HUMAN]	0.00333828	0.00197389	NAMPT
P00352	27	26	2597.68	1.51702	Huh7	HLE	Retinal dehydrogenase 1 OS=Homo sapiens GN=ALDH1A1 PE=1 SV=2 - [AL1A1_HUMAN]	7.3489e-08	1.41376e-08	ALDH1A1
P25685	6	4	407.34	1.51591	Huh7	HLE	DnaJ homolog subfamily B member 1 OS=Homo sapiens GN=DNAJB1 PE=1 SV=4 - [DNJB1_HUMAN]	0.000522629	0.000259892	DNAJB1
P07237	28	27	2523.95	1.51526	Huh7	HLE	Protein disulfide-isomerase OS=Homo sapiens GN=P4HB PE=1 SV=3 - [PDIA1_HUMAN]	0.000218235	0.000100602	P4HB
P09525	7	7	509.8	1.51365	Huh7	HLE	Annexin A4 OS=Homo sapiens GN=ANXA4 PE=1 SV=4 - [ANXA4_HUMAN]	0.0097733	0.0062613	ANXA4
P26640	16	16	974.58	1.51095	Huh7	HLE	Valine--tRNA ligase OS=Homo sapiens GN=VARS PE=1 SV=4 - [SYVC_HUMAN]	7.2804e-06	2.43649e-06	VARS
O00505	3	3	158.57	1.50678	Huh7	HLE	Importin subunit alpha-3 OS=Homo sapiens GN=KPNA3 PE=1 SV=2 - [IMA3_HUMAN]	0.00251536	0.00144165	KPNA3
P61204	10	2	687.31	1.50423	Huh7	HLE	ADP-ribosylation factor 3 OS=Homo sapiens GN=ARF3 PE=1 SV=2 - [ARF3_HUMAN]	0.00932526	0.00595733	ARF3
Q8WX92	2	2	90.78	1.50072	Huh7	HLE	Negative elongation factor B OS=Homo sapiens GN=COBRA1 PE=1 SV=1 - [NELFB_HUMAN]	0.00151201	0.000819941	COBRA1
O43747	6	6	352.18	1.49987	Huh7	HLE	AP-1 complex subunit gamma-1 OS=Homo sapiens GN=AP1G1 PE=1 SV=5 - [AP1G1_HUMAN]	0.000135741	5.99628e-05	AP1G1
Q16698	5	5	291.4	1.49743	Huh7	HLE	2,4-dienoyl-CoA reductase, mitochondrial OS=Homo sapiens GN=DECR1 PE=1 SV=1 - [DECR_HUMAN]	6.69043e-06	2.22205e-06	DECR1
P31689	7	6	337.07	1.49407	Huh7	HLE	DnaJ homolog subfamily A member 1 OS=Homo sapiens GN=DNAJA1 PE=1 SV=2 - [DNJA1_HUMAN]	3.3499e-05	1.30591e-05	DNAJA1
Q8WXF1	8	8	507.55	1.49041	Huh7	HLE	Paraspeckle component 1 OS=Homo sapiens GN=PSPC1 PE=1 SV=1 - [PSPC1_HUMAN]	0.00347048	0.00205905	PSPC1
Q92945	13	13	805.84	1.4846	Huh7	HLE	Far upstream element-binding protein 2 OS=Homo sapiens GN=KHSRP PE=1 SV=4 - [FUBP2_HUMAN]	7.16458e-05	2.97766e-05	KHSRP
Q9H3P7	4	4	262.15	1.48267	Huh7	HLE	Golgi resident protein GCP60 OS=Homo sapiens GN=ACBD3 PE=1 SV=4 - [GCP60_HUMAN]	0.000447846	0.000220103	ACBD3
Q9UJZ1	9	9	584.98	1.48076	Huh7	HLE	Stomatin-like protein 2 OS=Homo sapiens GN=STOML2 PE=1 SV=1 - [STML2_HUMAN]	0.000183872	8.34934e-05	STOML2
P35613	6	6	426.44	1.48054	Huh7	HLE	Basigin OS=Homo sapiens GN=BSG PE=1 SV=2 - [BASI_HUMAN]	0.000790427	0.000405399	BSG
P62258	11	9	914.68	1.47976	Huh7	HLE	14-3-3 protein epsilon OS=Homo sapiens GN=YWHAE PE=1 SV=1 - [1433E_HUMAN]	3.18991e-06	9.78393e-07	YWHAE
Q9Y4L1	24	23	1898.03	1.47016	Huh7	HLE	Hypoxia up-regulated protein 1 OS=Homo sapiens GN=HYOU1 PE=1 SV=1 - [HYOU1_HUMAN]	6.82833e-05	2.83047e-05	HYOU1
Q15631	3	3	156.28	1.46948	Huh7	HLE	Translin OS=Homo sapiens GN=TSN PE=1 SV=1 - [TSN_HUMAN]	9.59742e-06	3.30249e-06	TSN
P00367	18	18	1119.72	1.46888	Huh7	HLE	Glutamate dehydrogenase 1, mitochondrial OS=Homo sapiens GN=GLUD1 PE=1 SV=2 - [DHE3_HUMAN]	0.00025212	0.000118236	GLUD1
P69849	11	11	786.45	1.46626	Huh7	HLE	Nodal modulator 3 OS=Homo sapiens GN=NOMO3 PE=2 SV=2 - [NOMO3_HUMAN]	3.61952e-05	1.4281e-05	NOMO3
O60610	7	7	301.2	1.46542	Huh7	HLE	Protein diaphanous homolog 1 OS=Homo sapiens GN=DIAPH1 PE=1 SV=2 - [DIAP1_HUMAN]	7.40038e-06	2.47933e-06	DIAPH1
P08133	21	21	1329.68	1.46471	Huh7	HLE	Annexin A6 OS=Homo sapiens GN=ANXA6 PE=1 SV=3 - [ANXA6_HUMAN]	2.383e-05	8.99572e-06	ANXA6
Q13085	12	12	596.19	1.46337	Huh7	HLE	Acetyl-CoA carboxylase 1 OS=Homo sapiens GN=ACACA PE=1 SV=2 - [ACACA_HUMAN]	6.2539e-05	2.56966e-05	ACACA
Q02790	7	7	363.17	1.46122	Huh7	HLE	Peptidyl-prolyl cis-trans isomerase FKBP4 OS=Homo sapiens GN=FKBP4 PE=1 SV=3 - [FKBP4_HUMAN]	0.000282689	0.000133803	FKBP4
Q8TEM1	3	3	182.57	1.46117	Huh7	HLE	Nuclear pore membrane glycoprotein 210 OS=Homo sapiens GN=NUP210 PE=1 SV=3 - [PO210_HUMAN]	0.000761438	0.000388596	NUP210
P61081	2	2	69.31	1.45754	Huh7	HLE	NEDD8-conjugating enzyme Ubc12 OS=Homo sapiens GN=UBE2M PE=1 SV=1 - [UBC12_HUMAN]	0.000961281	0.000503844	UBE2M
P18085	8	3	611.28	1.45704	Huh7	HLE	ADP-ribosylation factor 4 OS=Homo sapiens GN=ARF4 PE=1 SV=3 - [ARF4_HUMAN]	0.000243738	0.000113774	ARF4
O43491	14	14	795.21	1.457	Huh7	HLE	Band 4.1-like protein 2 OS=Homo sapiens GN=EPB41L2 PE=1 SV=1 - [E41L2_HUMAN]	0.000227459	0.000105432	EPB41L2
Q5TFE4	2	2	52.67	1.45544	Huh7	HLE	5'-nucleotidase domain-containing protein 1 OS=Homo sapiens GN=NT5DC1 PE=1 SV=1 - [NT5D1_HUMAN]	0.00301021	0.00176133	NT5DC1
Q04446	2	2	78.48	1.45508	Huh7	HLE	1,4-alpha-glucan-branching enzyme OS=Homo sapiens GN=GBE1 PE=1 SV=3 - [GLGB_HUMAN]	0.0391591	0.0280012	GBE1
P52888	3	2	145.22	1.45463	Huh7	HLE	Thimet oligopeptidase OS=Homo sapiens GN=THOP1 PE=1 SV=2 - [THOP1_HUMAN]	0.0220527	0.0151287	THOP1
Q9Y678	17	17	1177.75	1.44889	Huh7	HLE	Coatomer subunit gamma-1 OS=Homo sapiens GN=COPG1 PE=1 SV=1 - [COPG1_HUMAN]	4.53881e-05	1.82706e-05	COPG1
O14602	3	3	407	1.4484	Huh7	HLE	Eukaryotic translation initiation factor 1A, Y-chromosomal OS=Homo sapiens GN=EIF1AY PE=1 SV=4 - [IF1AY_HUMAN]	0.000568054	0.000284542	EIF1AY
Q10570	6	5	280.53	1.4428	Huh7	HLE	Cleavage and polyadenylation specificity factor subunit 1 OS=Homo sapiens GN=CPSF1 PE=1 SV=2 - [CPSF1_HUMAN]	0.00133935	0.000721939	CPSF1
Q8N5G0	2	2	50.92	1.44205	Huh7	HLE	Small integral membrane protein 20 OS=Homo sapiens GN=SMIM20 PE=1 SV=3 - [SMI20_HUMAN]	0.00551794	0.00338487	SMIM20
Q7L0Y3	3	3	122.07	1.43992	Huh7	HLE	Mitochondrial ribonuclease P protein 1 OS=Homo sapiens GN=TRMT10C PE=1 SV=2 - [MRRP1_HUMAN]	0.00185655	0.00102498	TRMT10C
Q9NQG5	6	5	339.71	1.43968	Huh7	HLE	Regulation of nuclear pre-mRNA domain-containing protein 1B OS=Homo sapiens GN=RPRD1B PE=1 SV=1 - [RPR1B_HUMAN]	0.00120125	0.000641829	RPRD1B
Q8IZ83	4	4	180.23	1.43865	Huh7	HLE	Aldehyde dehydrogenase family 16 member A1 OS=Homo sapiens GN=ALDH16A1 PE=1 SV=2 - [A16A1_HUMAN]	6.38416e-05	2.63014e-05	ALDH16A1
Q9Y6E2	2	2	87.63	1.43611	Huh7	HLE	Basic leucine zipper and W2 domain-containing protein 2 OS=Homo sapiens GN=BZW2 PE=1 SV=1 - [BZW2_HUMAN]	0.000246559	0.00011527	BZW2
P51991	8	6	746.91	1.43578	Huh7	HLE	Heterogeneous nuclear ribonucleoprotein A3 OS=Homo sapiens GN=HNRNPA3 PE=1 SV=2 - [ROA3_HUMAN]	0.00209071	0.00116943	HNRNPA3
P50570	2	2	62.34	1.43278	Huh7	HLE	Dynamin-2 OS=Homo sapiens GN=DNM2 PE=1 SV=2 - [DYN2_HUMAN]	0.000377277	0.000182682	DNM2
Q8N6H7	4	4	200.69	1.4321	Huh7	HLE	ADP-ribosylation factor GTPase-activating protein 2 OS=Homo sapiens GN=ARFGAP2 PE=1 SV=1 - [ARFG2_HUMAN]	4.29703e-05	1.72037e-05	ARFGAP2
O43169	3	3	239.99	1.43171	Huh7	HLE	Cytochrome b5 type B OS=Homo sapiens GN=CYB5B PE=1 SV=2 - [CYB5B_HUMAN]	0.000458608	0.000225725	CYB5B
P43304	8	8	551.83	1.42596	Huh7	HLE	Glycerol-3-phosphate dehydrogenase, mitochondrial OS=Homo sapiens GN=GPD2 PE=1 SV=3 - [GPDM_HUMAN]	0.000415083	0.000202113	GPD2
O43837	2	2	186.92	1.42091	Huh7	HLE	Isocitrate dehydrogenase [NAD] subunit beta, mitochondrial OS=Homo sapiens GN=IDH3B PE=1 SV=2 - [IDH3B_HUMAN]	0.00249256	0.00142044	IDH3B
Q9NVP1	7	7	325.94	1.41589	Huh7	HLE	ATP-dependent RNA helicase DDX18 OS=Homo sapiens GN=DDX18 PE=1 SV=2 - [DDX18_HUMAN]	0.000441398	0.000216613	DDX18
Q9NZW5	3	3	149.45	1.4093	Huh7	HLE	MAGUK p55 subfamily member 6 OS=Homo sapiens GN=MPP6 PE=1 SV=2 - [MPP6_HUMAN]	0.00763136	0.00480042	MPP6
Q15365	8	7	713.85	1.40847	Huh7	HLE	Poly(rC)-binding protein 1 OS=Homo sapiens GN=PCBP1 PE=1 SV=2 - [PCBP1_HUMAN]	0.000343583	0.000164621	PCBP1
Q8IWX8	3	3	147.01	1.40753	Huh7	HLE	Calcium homeostasis endoplasmic reticulum protein OS=Homo sapiens GN=CHERP PE=1 SV=3 - [CHERP_HUMAN]	0.00074178	0.000378025	CHERP
O76031	5	5	184.36	1.40742	Huh7	HLE	ATP-dependent Clp protease ATP-binding subunit clpX-like, mitochondrial OS=Homo sapiens GN=CLPX PE=1 SV=2 - [CLPX_HUMAN]	0.00205297	0.00114609	CLPX
P55265	9	9	527.8	1.40559	Huh7	HLE	Double-stranded RNA-specific adenosine deaminase OS=Homo sapiens GN=ADAR PE=1 SV=4 - [DSRAD_HUMAN]	0.000171651	7.70717e-05	ADAR
P84090	4	3	259.05	1.40547	Huh7	HLE	Enhancer of rudimentary homolog OS=Homo sapiens GN=ERH PE=1 SV=1 - [ERH_HUMAN]	0.0277842	0.0194338	ERH
P42765	8	8	429.25	1.40489	Huh7	HLE	3-ketoacyl-CoA thiolase, mitochondrial OS=Homo sapiens GN=ACAA2 PE=1 SV=2 - [THIM_HUMAN]	8.34271e-06	2.81948e-06	ACAA2
P10515	10	10	564.1	1.40396	Huh7	HLE	Dihydrolipoyllysine-residue acetyltransferase component of pyruvate dehydrogenase complex, mitochondrial OS=Homo sapiens GN=DLAT PE=1 SV=3 - [ODP2_HUMAN]	0.000272164	0.000128525	DLAT
P48637	12	12	773.06	1.40366	Huh7	HLE	Glutathione synthetase OS=Homo sapiens GN=GSS PE=1 SV=1 - [GSHB_HUMAN]	5.31211e-07	1.33622e-07	GSS
Q9P035	4	4	202.88	1.40321	Huh7	HLE	3-hydroxyacyl-CoA dehydratase 3 OS=Homo sapiens GN=PTPLAD1 PE=1 SV=2 - [HACD3_HUMAN]	0.00309189	0.00181249	PTPLAD1
P53621	26	26	1616.41	1.40168	Huh7	HLE	Coatomer subunit alpha OS=Homo sapiens GN=COPA PE=1 SV=2 - [COPA_HUMAN]	1.567e-05	5.64233e-06	COPA
Q07021	5	5	409.84	1.39964	Huh7	HLE	Complement component 1 Q subcomponent-binding protein, mitochondrial OS=Homo sapiens GN=C1QBP PE=1 SV=1 - [C1QBP_HUMAN]	0.00289668	0.00168859	C1QBP
P11387	5	5	205.67	1.39888	Huh7	HLE	DNA topoisomerase 1 OS=Homo sapiens GN=TOP1 PE=1 SV=2 - [TOP1_HUMAN]	0.0128057	0.00834812	TOP1
O43776	11	11	658.08	1.39738	Huh7	HLE	Asparagine--tRNA ligase, cytoplasmic OS=Homo sapiens GN=NARS PE=1 SV=1 - [SYNC_HUMAN]	0.000106116	4.56433e-05	NARS
Q14103	8	5	547.8	1.39713	Huh7	HLE	Heterogeneous nuclear ribonucleoprotein D0 OS=Homo sapiens GN=HNRNPD PE=1 SV=1 - [HNRPD_HUMAN]	0.0184603	0.0124699	HNRNPD
P28838	17	17	1212.98	1.39676	Huh7	HLE	Cytosol aminopeptidase OS=Homo sapiens GN=LAP3 PE=1 SV=3 - [AMPL_HUMAN]	0.000106116	4.56427e-05	LAP3
P69905	4	4	175.04	1.39674	Huh7	HLE	Hemoglobin subunit alpha OS=Homo sapiens GN=HBA1 PE=1 SV=2 - [HBA_HUMAN]	0.0126204	0.00821356	HBA1
P50991	27	25	2271.43	1.39537	Huh7	HLE	T-complex protein 1 subunit delta OS=Homo sapiens GN=CCT4 PE=1 SV=4 - [TCPD_HUMAN]	0.00250349	0.00143212	CCT4
O43795	9	9	429.25	1.39478	Huh7	HLE	Unconventional myosin-Ib OS=Homo sapiens GN=MYO1B PE=2 SV=3 - [MYO1B_HUMAN]	8.8821e-06	3.03378e-06	MYO1B
P49368	20	20	1661.52	1.39338	Huh7	HLE	T-complex protein 1 subunit gamma OS=Homo sapiens GN=CCT3 PE=1 SV=4 - [TCPG_HUMAN]	4.79288e-05	1.93629e-05	CCT3
Q7LGA3	3	3	180.5	1.39187	Huh7	HLE	Heparan sulfate 2-O-sulfotransferase 1 OS=Homo sapiens GN=HS2ST1 PE=1 SV=1 - [HS2ST_HUMAN]	0.000235434	0.00010947	HS2ST1
P35606	17	17	904.53	1.3897	Huh7	HLE	Coatomer subunit beta' OS=Homo sapiens GN=COPB2 PE=1 SV=2 - [COPB2_HUMAN]	0.000127961	5.61543e-05	COPB2
P55010	6	6	338.19	1.38386	Huh7	HLE	Eukaryotic translation initiation factor 5 OS=Homo sapiens GN=EIF5 PE=1 SV=2 - [IF5_HUMAN]	0.000124295	5.44099e-05	EIF5
Q15785	5	5	370.3	1.38128	Huh7	HLE	Mitochondrial import receptor subunit TOM34 OS=Homo sapiens GN=TOMM34 PE=1 SV=2 - [TOM34_HUMAN]	1.29196e-05	4.53945e-06	TOMM34
P51149	12	12	762.19	1.38121	Huh7	HLE	Ras-related protein Rab-7a OS=Homo sapiens GN=RAB7A PE=1 SV=1 - [RAB7A_HUMAN]	0.00249599	0.00142421	RAB7A
P13674	7	7	550.98	1.37904	Huh7	HLE	Prolyl 4-hydroxylase subunit alpha-1 OS=Homo sapiens GN=P4HA1 PE=1 SV=2 - [P4HA1_HUMAN]	0.000158595	7.06337e-05	P4HA1
P78417	6	6	279.93	1.37604	Huh7	HLE	Glutathione S-transferase omega-1 OS=Homo sapiens GN=GSTO1 PE=1 SV=2 - [GSTO1_HUMAN]	0.0138115	0.00906398	GSTO1
P15170	7	6	432.52	1.37593	Huh7	HLE	Eukaryotic peptide chain release factor GTP-binding subunit ERF3A OS=Homo sapiens GN=GSPT1 PE=1 SV=1 - [ERF3A_HUMAN]	2.39906e-05	9.07375e-06	GSPT1
Q5TDH0	2	2	116.39	1.37524	Huh7	HLE	Protein DDI1 homolog 2 OS=Homo sapiens GN=DDI2 PE=1 SV=1 - [DDI2_HUMAN]	0.00096497	0.000506127	DDI2
P19623	5	5	243.27	1.36635	Huh7	HLE	Spermidine synthase OS=Homo sapiens GN=SRM PE=1 SV=1 - [SPEE_HUMAN]	0.000218718	0.000100904	SRM
Q92688	5	2	363.03	1.36576	Huh7	HLE	Acidic leucine-rich nuclear phosphoprotein 32 family member B OS=Homo sapiens GN=ANP32B PE=1 SV=1 - [AN32B_HUMAN]	0.00567101	0.00349317	ANP32B
Q8IXH7	4	4	198.03	1.3607	Huh7	HLE	Negative elongation factor C/D OS=Homo sapiens GN=TH1L PE=1 SV=2 - [NELFD_HUMAN]	0.00234016	0.00132255	TH1L
Q9HCC0	7	7	513.19	1.35839	Huh7	HLE	Methylcrotonoyl-CoA carboxylase beta chain, mitochondrial OS=Homo sapiens GN=MCCC2 PE=1 SV=1 - [MCCB_HUMAN]	0.00115526	0.000615581	MCCC2
P19105	6	4	576.5	1.35752	Huh7	HLE	Myosin regulatory light chain 12A OS=Homo sapiens GN=MYL12A PE=1 SV=2 - [ML12A_HUMAN]	0.00381418	0.00228712	MYL12A
O14979	8	5	450.79	1.35582	Huh7	HLE	Heterogeneous nuclear ribonucleoprotein D-like OS=Homo sapiens GN=HNRPDL PE=1 SV=3 - [HNRDL_HUMAN]	0.0239549	0.0165989	HNRPDL
P06730	2	2	142.15	1.3533	Huh7	HLE	Eukaryotic translation initiation factor 4E OS=Homo sapiens GN=EIF4E PE=1 SV=2 - [IF4E_HUMAN]	0.0019723	0.00109318	EIF4E
Q13423	3	3	115.66	1.3532	Huh7	HLE	NAD(P) transhydrogenase, mitochondrial OS=Homo sapiens GN=NNT PE=1 SV=3 - [NNTM_HUMAN]	0.00330382	0.00194992	NNT
Q15366	7	6	750.77	1.34931	Huh7	HLE	Poly(rC)-binding protein 2 OS=Homo sapiens GN=PCBP2 PE=1 SV=1 - [PCBP2_HUMAN]	0.00100431	0.000528583	PCBP2
Q15274	3	3	257.99	1.34809	Huh7	HLE	Nicotinate-nucleotide pyrophosphorylase [carboxylating] OS=Homo sapiens GN=QPRT PE=1 SV=3 - [NADC_HUMAN]	0.00123729	0.00066378	QPRT
Q8TC12	3	3	166.89	1.34802	Huh7	HLE	Retinol dehydrogenase 11 OS=Homo sapiens GN=RDH11 PE=1 SV=2 - [RDH11_HUMAN]	0.0425882	0.0307315	RDH11
P27695	8	8	706.17	1.34614	Huh7	HLE	DNA-(apurinic or apyrimidinic site) lyase OS=Homo sapiens GN=APEX1 PE=1 SV=2 - [APEX1_HUMAN]	3.49014e-06	1.08821e-06	AX1
P23919	2	2	95.77	1.34283	Huh7	HLE	Thymidylate kinase OS=Homo sapiens GN=DTYMK PE=1 SV=4 - [KTHY_HUMAN]	0.0272486	0.0190394	DTYMK
P09429	9	5	642.29	1.34115	Huh7	HLE	High mobility group protein B1 OS=Homo sapiens GN=HMGB1 PE=1 SV=3 - [HMGB1_HUMAN]	0.00253773	0.00145631	HMGB1
P52292	14	14	1109.05	1.33815	Huh7	HLE	Importin subunit alpha-2 OS=Homo sapiens GN=KPNA2 PE=1 SV=1 - [IMA2_HUMAN]	0.000299529	0.000142099	KPNA2
Q8NHH9	5	4	157.4	1.33726	Huh7	HLE	Atlastin-2 OS=Homo sapiens GN=ATL2 PE=1 SV=2 - [ATLA2_HUMAN]	0.00215307	0.00120588	ATL2
P09622	9	9	694.53	1.33515	Huh7	HLE	Dihydrolipoyl dehydrogenase, mitochondrial OS=Homo sapiens GN=DLD PE=1 SV=2 - [DLDH_HUMAN]	6.13682e-06	2.01813e-06	DLD
Q13011	9	8	735.29	1.33456	Huh7	HLE	Delta(3,5)-Delta(2,4)-dienoyl-CoA isomerase, mitochondrial OS=Homo sapiens GN=ECH1 PE=1 SV=2 - [ECH1_HUMAN]	3.62651e-05	1.43217e-05	ECH1
P62851	3	3	262.31	1.32907	Huh7	HLE	40S ribosomal protein S25 OS=Homo sapiens GN=RPS25 PE=1 SV=1 - [RS25_HUMAN]	0.0394725	0.0282683	RPS25
P78371	29	29	2808.93	1.32665	Huh7	HLE	T-complex protein 1 subunit beta OS=Homo sapiens GN=CCT2 PE=1 SV=4 - [TCPB_HUMAN]	0.000393391	0.000190913	CCT2
Q8WUM4	22	22	1590.74	1.32408	Huh7	HLE	Programmed cell death 6-interacting protein OS=Homo sapiens GN=PDCD6IP PE=1 SV=1 - [PDC6I_HUMAN]	0.00252958	0.00145072	PDCD6IP
Q9H8H0	2	2	87.18	1.31952	Huh7	HLE	Nucleolar protein 11 OS=Homo sapiens GN=NOL11 PE=1 SV=1 - [NOL11_HUMAN]	0.0026773	0.0015471	NOL11
Q9NVA2	4	3	186.08	1.31865	Huh7	HLE	Septin-11 OS=Homo sapiens GN=SEPT11 PE=1 SV=3 - [SEP11_HUMAN]	0.00157159	0.000857956	SEPT11
O95433	6	6	270.04	1.31382	Huh7	HLE	Activator of 90 kDa heat shock protein ATPase homolog 1 OS=Homo sapiens GN=AHSA1 PE=1 SV=1 - [AHSA1_HUMAN]	1.7402e-05	6.32916e-06	AHSA1
Q16543	5	5	306.02	1.31305	Huh7	HLE	Hsp90 co-chaperone Cdc37 OS=Homo sapiens GN=CDC37 PE=1 SV=1 - [CDC37_HUMAN]	0.00205048	0.00114395	CDC37
Q13310	14	6	1080.09	1.31206	Huh7	HLE	Polyadenylate-binding protein 4 OS=Homo sapiens GN=PABPC4 PE=1 SV=1 - [PABP4_HUMAN]	8.74148e-05	3.68882e-05	PABPC4
P06132	3	3	153.29	1.3108	Huh7	HLE	Uroporphyrinogen decarboxylase OS=Homo sapiens GN=UROD PE=1 SV=2 - [DCUP_HUMAN]	0.0451435	0.0327721	UROD
Q13404	4	3	196.66	1.30925	Huh7	HLE	Ubiquitin-conjugating enzyme E2 variant 1 OS=Homo sapiens GN=UBE2V1 PE=1 SV=2 - [UB2V1_HUMAN]	0.0188272	0.0127314	UBE2V1
Q16401	6	5	257.88	1.30729	Huh7	HLE	26S proteasome non-ATPase regulatory subunit 5 OS=Homo sapiens GN=PSMD5 PE=1 SV=3 - [PSMD5_HUMAN]	0.00062738	0.000316081	PSMD5
Q9UKV3	8	8	445.84	1.30718	Huh7	HLE	Apoptotic chromatin condensation inducer in the nucleus OS=Homo sapiens GN=ACIN1 PE=1 SV=2 - [ACINU_HUMAN]	0.0189406	0.012815	ACIN1
P50213	2	2	119.41	1.3059	Huh7	HLE	Isocitrate dehydrogenase [NAD] subunit alpha, mitochondrial OS=Homo sapiens GN=IDH3A PE=1 SV=1 - [IDH3A_HUMAN]	0.00447107	0.00271186	IDH3A
Q9UM00	2	2	114.36	1.30559	Huh7	HLE	Transmembrane and coiled-coil domain-containing protein 1 OS=Homo sapiens GN=TMCO1 PE=1 SV=1 - [TMCO1_HUMAN]	0.0264575	0.0184578	TMCO1
P48643	21	19	1761.79	1.30515	Huh7	HLE	T-complex protein 1 subunit epsilon OS=Homo sapiens GN=CCT5 PE=1 SV=1 - [TCPE_HUMAN]	0.000226049	0.000104614	CCT5
P05388	11	11	748.77	1.30459	Huh7	HLE	60S acidic ribosomal protein P0 OS=Homo sapiens GN=RPLP0 PE=1 SV=1 - [RLA0_HUMAN]	0.000267611	0.000125986	RPLP0
P48735	10	9	560.5	1.29987	Huh7	HLE	Isocitrate dehydrogenase [NADP], mitochondrial OS=Homo sapiens GN=IDH2 PE=1 SV=2 - [IDHP_HUMAN]	0.000629565	0.000317639	IDH2
P38606	18	18	1080.45	1.299	Huh7	HLE	V-type proton ATPase catalytic subunit A OS=Homo sapiens GN=ATP6V1A PE=1 SV=2 - [VATA_HUMAN]	7.94836e-06	2.68023e-06	ATP6V1A
Q15424	8	6	413.49	1.29883	Huh7	HLE	Scaffold attachment factor B1 OS=Homo sapiens GN=SAFB PE=1 SV=4 - [SAFB1_HUMAN]	0.00343052	0.00203216	SAFB
P61981	7	3	392.22	1.29784	Huh7	HLE	14-3-3 protein gamma OS=Homo sapiens GN=YWHAG PE=1 SV=2 - [1433G_HUMAN]	0.0395875	0.0283651	YWHAG
O43765	3	3	156.2	1.29554	Huh7	HLE	Small glutamine-rich tetratricopeptide repeat-containing protein alpha OS=Homo sapiens GN=SGTA PE=1 SV=1 - [SGTA_HUMAN]	0.00310868	0.00182346	SGTA
P05455	9	8	712.72	1.29439	Huh7	HLE	Lupus La protein OS=Homo sapiens GN=SSB PE=1 SV=2 - [LA_HUMAN]	0.00205419	0.00114751	SSB
P63220	2	2	264.74	1.2931	Huh7	HLE	40S ribosomal protein S21 OS=Homo sapiens GN=RPS21 PE=1 SV=1 - [RS21_HUMAN]	0.0023174	0.00130716	RPS21
P19338	26	26	2657.94	1.29289	Huh7	HLE	Nucleolin OS=Homo sapiens GN=NCL PE=1 SV=3 - [NUCL_HUMAN]	0.00549854	0.00336898	NCL
Q9NP81	5	5	317.63	1.29262	Huh7	HLE	Serine--tRNA ligase, mitochondrial OS=Homo sapiens GN=SARS2 PE=1 SV=1 - [SYSM_HUMAN]	0.00670906	0.00419347	SARS2
P61077	3	2	191.27	1.29123	Huh7	HLE	Ubiquitin-conjugating enzyme E2 D3 OS=Homo sapiens GN=UBE2D3 PE=1 SV=1 - [UB2D3_HUMAN]	0.0115978	0.0074933	UBE2D3
P07737	12	12	1285.38	1.29083	Huh7	HLE	Profilin-1 OS=Homo sapiens GN=PFN1 PE=1 SV=2 - [PROF1_HUMAN]	0.0223735	0.0153732	PFN1
P14618	37	37	3116.86	1.28868	Huh7	HLE	Pyruvate kinase isozymes M1/M2 OS=Homo sapiens GN=PKM PE=1 SV=4 - [KPYM_HUMAN]	5.21185e-05	2.11312e-05	PKM
O43592	6	6	259.21	1.28859	Huh7	HLE	Exportin-T OS=Homo sapiens GN=XPOT PE=1 SV=2 - [XPOT_HUMAN]	0.00750259	0.00471397	XPOT
P63092	10	9	480.19	1.28832	Huh7	HLE	Guanine nucleotide-binding protein G(s) subunit alpha isoforms short OS=Homo sapiens GN=GNAS PE=1 SV=1 - [GNAS2_HUMAN]	0.00396112	0.00238386	GNAS
P11940	21	13	1863.46	1.28785	Huh7	HLE	Polyadenylate-binding protein 1 OS=Homo sapiens GN=PABPC1 PE=1 SV=2 - [PABP1_HUMAN]	0.0128057	0.00834581	PABPC1
Q5VYK3	6	6	245.87	1.28682	Huh7	HLE	Proteasome-associated protein ECM29 homolog OS=Homo sapiens GN=ECM29 PE=1 SV=2 - [ECM29_HUMAN]	0.00500477	0.00305373	ECM29
P25398	7	7	556.53	1.28647	Huh7	HLE	40S ribosomal protein S12 OS=Homo sapiens GN=RPS12 PE=1 SV=3 - [RS12_HUMAN]	0.00802723	0.00506109	RPS12
P49821	7	7	416.44	1.28601	Huh7	HLE	NADH dehydrogenase [ubiquinone] flavoprotein 1, mitochondrial OS=Homo sapiens GN=NDUFV1 PE=1 SV=4 - [NDUV1_HUMAN]	0.00238818	0.00135663	NDUFV1
P05387	5	5	567.88	1.28452	Huh7	HLE	60S acidic ribosomal protein P2 OS=Homo sapiens GN=RPLP2 PE=1 SV=1 - [RLA2_HUMAN]	0.0147405	0.00973783	RPLP2
Q15020	6	6	312.77	1.28448	Huh7	HLE	Squamous cell carcinoma antigen recognized by T-cells 3 OS=Homo sapiens GN=SART3 PE=1 SV=1 - [SART3_HUMAN]	8.80402e-05	3.71974e-05	SART3
Q16836	4	4	190.01	1.28177	Huh7	HLE	Hydroxyacyl-coenzyme A dehydrogenase, mitochondrial OS=Homo sapiens GN=HADH PE=1 SV=3 - [HCDH_HUMAN]	0.0056223	0.00345297	HADH
Q16531	33	32	1993.8	1.28167	Huh7	HLE	DNA damage-binding protein 1 OS=Homo sapiens GN=DDB1 PE=1 SV=1 - [DDB1_HUMAN]	4.64599e-05	1.87357e-05	DDB1
P62829	7	7	505.87	1.28016	Huh7	HLE	60S ribosomal protein L23 OS=Homo sapiens GN=RPL23 PE=1 SV=1 - [RL23_HUMAN]	0.00909502	0.00580695	RPL23
Q9UKY7	4	4	251.16	1.28002	Huh7	HLE	Protein CDV3 homolog OS=Homo sapiens GN=CDV3 PE=1 SV=1 - [CDV3_HUMAN]	0.00086413	0.000447591	CDV3
P28370	3	2	151.39	1.28	Huh7	HLE	Probable global transcription activator SNF2L1 OS=Homo sapiens GN=SMARCA1 PE=1 SV=2 - [SMCA1_HUMAN]	0.0428147	0.030926	SMARCA1
Q9Y2S7	2	2	161.81	1.27972	Huh7	HLE	Polymerase delta-interacting protein 2 OS=Homo sapiens GN=POLDIP2 PE=1 SV=1 - [PDIP2_HUMAN]	0.0455734	0.0331172	POLDIP2
Q99873	13	13	1191.09	1.27968	Huh7	HLE	Protein arginine N-methyltransferase 1 OS=Homo sapiens GN=PRMT1 PE=1 SV=2 - [ANM1_HUMAN]	0.00159886	0.000874004	PRMT1
Q9UMS4	16	16	1197.05	1.27939	Huh7	HLE	Pre-mRNA-processing factor 19 OS=Homo sapiens GN=PRPF19 PE=1 SV=1 - [PRP19_HUMAN]	1.82042e-05	6.6804e-06	PRPF19
P21281	9	9	582.42	1.27911	Huh7	HLE	V-type proton ATPase subunit B, brain isoform OS=Homo sapiens GN=ATP6V1B2 PE=1 SV=3 - [VATB2_HUMAN]	0.00594261	0.00366911	ATP6V1B2
Q99832	25	25	1975.12	1.27872	Huh7	HLE	T-complex protein 1 subunit eta OS=Homo sapiens GN=CCT7 PE=1 SV=2 - [TCPH_HUMAN]	0.000149588	6.6405e-05	CCT7
P18615	2	2	88.25	1.2779	Huh7	HLE	Negative elongation factor E OS=Homo sapiens GN=NELFE PE=1 SV=3 - [NELFE_HUMAN]	0.00271231	0.00157225	NELFE
Q969H8	2	2	198.49	1.2758	Huh7	HLE	UPF0556 protein C19orf10 OS=Homo sapiens GN=C19orf10 PE=1 SV=1 - [CS010_HUMAN]	0.0095596	0.00611745	C19orf10
Q9UL46	7	7	764.11	1.2726	Huh7	HLE	Proteasome activator complex subunit 2 OS=Homo sapiens GN=PSME2 PE=1 SV=4 - [PSME2_HUMAN]	1.56572e-05	5.63205e-06	PSME2
Q9BY44	3	3	131.26	1.27257	Huh7	HLE	Eukaryotic translation initiation factor 2A OS=Homo sapiens GN=EIF2A PE=1 SV=3 - [EIF2A_HUMAN]	0.0421287	0.0303694	EIF2A
O75844	2	2	60.85	1.27179	Huh7	HLE	CAAX prenyl protease 1 homolog OS=Homo sapiens GN=ZMPSTE24 PE=1 SV=2 - [FACE1_HUMAN]	0.0138894	0.00913018	ZMPSTE24
Q8TCJ2	4	3	170.36	1.27138	Huh7	HLE	Dolichyl-diphosphooligosaccharide--protein glycosyltransferase subunit STT3B OS=Homo sapiens GN=STT3B PE=1 SV=1 - [STT3B_HUMAN]	0.0182677	0.0123199	STT3B
P10644	5	5	220.72	1.26996	Huh7	HLE	cAMP-dependent protein kinase type I-alpha regulatory subunit OS=Homo sapiens GN=PRKAR1A PE=1 SV=1 - [KAP0_HUMAN]	0.00100568	0.000530033	PRKAR1A
P54578	12	12	792.95	1.26967	Huh7	HLE	Ubiquitin carboxyl-terminal hydrolase 14 OS=Homo sapiens GN=USP14 PE=1 SV=3 - [UBP14_HUMAN]	0.014552	0.009608	USP14
P07814	32	32	1778.48	1.26851	Huh7	HLE	Bifunctional glutamate/proline--tRNA ligase OS=Homo sapiens GN=EPRS PE=1 SV=5 - [SYEP_HUMAN]	0.000491654	0.000243775	EPRS
Q9H0U4	11	4	994.57	1.26837	Huh7	HLE	Ras-related protein Rab-1B OS=Homo sapiens GN=RAB1B PE=1 SV=1 - [RAB1B_HUMAN]	0.00236296	0.00133801	RAB1B
P40227	21	19	1512.91	1.2657	Huh7	HLE	T-complex protein 1 subunit zeta OS=Homo sapiens GN=CCT6A PE=1 SV=3 - [TCPZ_HUMAN]	0.00151916	0.000824369	CCT6A
P02671	3	3	121.52	1.26474	Huh7	HLE	Fibrinogen alpha chain OS=Homo sapiens GN=FGA PE=1 SV=2 - [FIBA_HUMAN]	0.00812123	0.00512625	FGA
P54577	9	9	427.67	1.26363	Huh7	HLE	Tyrosine--tRNA ligase, cytoplasmic OS=Homo sapiens GN=YARS PE=1 SV=4 - [SYYC_HUMAN]	0.0184078	0.0124211	YARS
Q14669	2	2	72.11	1.26243	Huh7	HLE	E3 ubiquitin-protein ligase TRIP12 OS=Homo sapiens GN=TRIP12 PE=1 SV=1 - [TRIPC_HUMAN]	0.00250881	0.00143699	TRIP12
O43143	20	20	1061.36	1.26181	Huh7	HLE	Putative pre-mRNA-splicing factor ATP-dependent RNA helicase DHX15 OS=Homo sapiens GN=DHX15 PE=1 SV=2 - [DHX15_HUMAN]	0.000930752	0.000486491	DHX15
Q8N684	4	4	234.3	1.26097	Huh7	HLE	Cleavage and polyadenylation specificity factor subunit 7 OS=Homo sapiens GN=CPSF7 PE=1 SV=1 - [CPSF7_HUMAN]	0.00822985	0.00520378	CPSF7
Q9HB71	6	6	394.94	1.25844	Huh7	HLE	Calcyclin-binding protein OS=Homo sapiens GN=CACYBP PE=1 SV=2 - [CYBP_HUMAN]	0.00203938	0.00113554	CACYBP
Q9BTT0	4	4	299.45	1.25653	Huh7	HLE	Acidic leucine-rich nuclear phosphoprotein 32 family member E OS=Homo sapiens GN=ANP32E PE=1 SV=1 - [AN32E_HUMAN]	0.00612675	0.00379392	ANP32E
P63151	3	3	187.47	1.25572	Huh7	HLE	Serine/threonine-protein phosphatase 2A 55 kDa regulatory subunit B alpha isoform OS=Homo sapiens GN=PPP2R2A PE=1 SV=1 - [2ABA_HUMAN]	0.000345263	0.000165551	PPP2R2A
O60763	11	11	678.24	1.25547	Huh7	HLE	General vesicular transport factor p115 OS=Homo sapiens GN=USO1 PE=1 SV=2 - [USO1_HUMAN]	0.00836013	0.00529222	USO1
Q9NTI5	4	3	207.11	1.25519	Huh7	HLE	Sister chromatid cohesion protein PDS5 homolog B OS=Homo sapiens GN=PDS5B PE=1 SV=1 - [PDS5B_HUMAN]	0.0232133	0.0160176	PDS5B
P63173	4	4	274.35	1.25093	Huh7	HLE	60S ribosomal protein L38 OS=Homo sapiens GN=RPL38 PE=1 SV=2 - [RL38_HUMAN]	0.0138981	0.00914096	RPL38
P38435	2	2	93.35	1.25069	Huh7	HLE	Vitamin K-dependent gamma-carboxylase OS=Homo sapiens GN=GGCX PE=1 SV=2 - [VKGC_HUMAN]	0.0249672	0.0173366	GGCX
Q08J23	4	4	193.26	1.2481	Huh7	HLE	tRNA (cytosine(34)-C(5))-methyltransferase OS=Homo sapiens GN=NSUN2 PE=1 SV=2 - [NSUN2_HUMAN]	0.00223377	0.00125513	NSUN2
Q15056	5	5	170.58	1.24755	Huh7	HLE	Eukaryotic translation initiation factor 4H OS=Homo sapiens GN=EIF4H PE=1 SV=5 - [IF4H_HUMAN]	0.0118985	0.0077085	EIF4H
P46783	7	7	565.78	1.24702	Huh7	HLE	40S ribosomal protein S10 OS=Homo sapiens GN=RPS10 PE=1 SV=1 - [RS10_HUMAN]	0.0182352	0.0122914	RPS10
P17844	21	16	1264.92	1.24589	Huh7	HLE	Probable ATP-dependent RNA helicase DDX5 OS=Homo sapiens GN=DDX5 PE=1 SV=1 - [DDX5_HUMAN]	0.00484695	0.00295215	DDX5
Q13126	4	4	232.76	1.24459	Huh7	HLE	S-methyl-5'-thioadenosine phosphorylase OS=Homo sapiens GN=MTAP PE=1 SV=2 - [MTAP_HUMAN]	1.33727e-05	4.73264e-06	MTAP
P04843	22	22	1768.75	1.24423	Huh7	HLE	Dolichyl-diphosphooligosaccharide--protein glycosyltransferase subunit 1 OS=Homo sapiens GN=RPN1 PE=1 SV=1 - [RPN1_HUMAN]	0.000226974	0.000105125	RPN1
Q12800	3	3	109.6	1.24376	Huh7	HLE	Alpha-globin transcription factor CP2 OS=Homo sapiens GN=TFCP2 PE=1 SV=2 - [TFCP2_HUMAN]	0.000365616	0.000176372	TFCP2
P78347	10	10	529.85	1.24376	Huh7	HLE	General transcription factor II-I OS=Homo sapiens GN=GTF2I PE=1 SV=2 - [GTF2I_HUMAN]	0.000286825	0.000135864	GTF2I
Q8IYS2	2	2	134.22	1.2415	Huh7	HLE	Uncharacterized protein KIAA2013 OS=Homo sapiens GN=KIAA2013 PE=2 SV=1 - [K2013_HUMAN]	0.0101916	0.00656258	KIAA2013
P14868	13	13	904.05	1.24126	Huh7	HLE	Aspartate--tRNA ligase, cytoplasmic OS=Homo sapiens GN=DARS PE=1 SV=2 - [SYDC_HUMAN]	0.00361898	0.00215694	DARS
Q8WUM0	4	4	219.56	1.23876	Huh7	HLE	Nuclear pore complex protein Nup133 OS=Homo sapiens GN=NUP133 PE=1 SV=2 - [NU133_HUMAN]	0.0132684	0.00867963	NUP133
P46459	4	4	311	1.2344	Huh7	HLE	Vesicle-fusing ATPase OS=Homo sapiens GN=NSF PE=1 SV=3 - [NSF_HUMAN]	0.00989089	0.00635099	NSF
P40926	19	18	1632.3	1.2339	Huh7	HLE	Malate dehydrogenase, mitochondrial OS=Homo sapiens GN=MDH2 PE=1 SV=3 - [MDHM_HUMAN]	0.00399971	0.00240999	MDH2
P62244	4	3	286.31	1.23353	Huh7	HLE	40S ribosomal protein S15a OS=Homo sapiens GN=RPS15A PE=1 SV=2 - [RS15A_HUMAN]	0.00906869	0.00578685	RPS15A
P04406	25	25	2728.16	1.23297	Huh7	HLE	Glyceraldehyde-3-phosphate dehydrogenase OS=Homo sapiens GN=GAPDH PE=1 SV=3 - [G3P_HUMAN]	0.00153523	0.00083365	GAPDH
Q06323	8	8	475.12	1.23221	Huh7	HLE	Proteasome activator complex subunit 1 OS=Homo sapiens GN=PSME1 PE=1 SV=1 - [PSME1_HUMAN]	0.0374117	0.0266839	PSME1
Q9HAV4	5	5	229.93	1.23186	Huh7	HLE	Exportin-5 OS=Homo sapiens GN=XPO5 PE=1 SV=1 - [XPO5_HUMAN]	0.00594677	0.00367383	XPO5
Q7L2E3	6	6	290.99	1.2309	Huh7	HLE	Putative ATP-dependent RNA helicase DHX30 OS=Homo sapiens GN=DHX30 PE=1 SV=1 - [DHX30_HUMAN]	0.026904	0.0187791	DHX30
P48444	11	11	766.33	1.23056	Huh7	HLE	Coatomer subunit delta OS=Homo sapiens GN=ARCN1 PE=1 SV=1 - [COPD_HUMAN]	3.87216e-05	1.53762e-05	ARCN1
P63244	15	15	1271.2	1.22946	Huh7	HLE	Guanine nucleotide-binding protein subunit beta-2-like 1 OS=Homo sapiens GN=GNB2L1 PE=1 SV=3 - [GBLP_HUMAN]	0.0132287	0.00864787	GNB2L1
Q8IY67	2	2	86.94	1.22877	Huh7	HLE	Ribonucleoprotein PTB-binding 1 OS=Homo sapiens GN=RAVER1 PE=1 SV=1 - [RAVR1_HUMAN]	0.0217985	0.0149464	RAVER1
Q15843	2	2	260.67	1.22694	Huh7	HLE	NEDD8 OS=Homo sapiens GN=NEDD8 PE=1 SV=1 - [NEDD8_HUMAN]	0.0239549	0.0165969	NEDD8
P48449	6	6	300.96	1.22659	Huh7	HLE	Lanosterol synthase OS=Homo sapiens GN=LSS PE=1 SV=1 - [ERG7_HUMAN]	0.00578328	0.00356653	LSS
P08865	11	11	725.13	1.22487	Huh7	HLE	40S ribosomal protein SA OS=Homo sapiens GN=RPSA PE=1 SV=4 - [RSSA_HUMAN]	0.00334582	0.00197956	RPSA
P68104	23	14	2183.62	1.22207	Huh7	HLE	Elongation factor 1-alpha 1 OS=Homo sapiens GN=EEF1A1 PE=1 SV=1 - [EF1A1_HUMAN]	0.00300612	0.00175784	EEF1A1
P60174	17	17	1705.08	1.22185	Huh7	HLE	Triosephosphate isomerase OS=Homo sapiens GN=TPI1 PE=1 SV=3 - [TPIS_HUMAN]	0.019512	0.013237	TPI1
Q9BT78	4	4	294.26	1.21965	Huh7	HLE	COP9 signalosome complex subunit 4 OS=Homo sapiens GN=COPS4 PE=1 SV=1 - [CSN4_HUMAN]	0.00232059	0.00130981	COPS4
Q14157	8	8	484.29	1.21754	Huh7	HLE	Ubiquitin-associated protein 2-like OS=Homo sapiens GN=UBAP2L PE=1 SV=2 - [UBP2L_HUMAN]	0.0415066	0.0298908	UBAP2L
P62993	3	3	123.44	1.21531	Huh7	HLE	Growth factor receptor-bound protein 2 OS=Homo sapiens GN=GRB2 PE=1 SV=1 - [GRB2_HUMAN]	0.0202685	0.0138017	GRB2
Q52LJ0	3	2	221.56	1.21524	Huh7	HLE	Protein FAM98B OS=Homo sapiens GN=FAM98B PE=1 SV=1 - [FA98B_HUMAN]	0.00617316	0.00382938	FAM98B
P53990	4	4	239.86	1.21024	Huh7	HLE	IST1 homolog OS=Homo sapiens GN=IST1 PE=1 SV=1 - [IST1_HUMAN]	0.0448493	0.0325259	IST1
Q8NE71	6	6	247.61	1.20754	Huh7	HLE	ATP-binding cassette sub-family F member 1 OS=Homo sapiens GN=ABCF1 PE=1 SV=2 - [ABCF1_HUMAN]	0.0354255	0.0252029	ABCF1
Q92621	6	6	280.39	1.2067	Huh7	HLE	Nuclear pore complex protein Nup205 OS=Homo sapiens GN=NUP205 PE=1 SV=3 - [NU205_HUMAN]	0.00980283	0.00629089	NUP205
P53618	14	14	836.29	1.20436	Huh7	HLE	Coatomer subunit beta OS=Homo sapiens GN=COPB1 PE=1 SV=3 - [COPB_HUMAN]	0.0227354	0.0156647	COPB1
Q7Z2W4	8	8	522.71	1.20388	Huh7	HLE	Zinc finger CCCH-type antiviral protein 1 OS=Homo sapiens GN=ZC3HAV1 PE=1 SV=3 - [ZCCHV_HUMAN]	0.0403873	0.0289821	ZC3HAV1
Q15067	8	8	413.87	1.20352	Huh7	HLE	Peroxisomal acyl-coenzyme A oxidase 1 OS=Homo sapiens GN=ACOX1 PE=1 SV=3 - [ACOX1_HUMAN]	0.00232395	0.00131254	ACOX1
P20290	4	4	282.82	1.20225	Huh7	HLE	Transcription factor BTF3 OS=Homo sapiens GN=BTF3 PE=1 SV=1 - [BTF3_HUMAN]	0.00648344	0.00402891	BTF3
Q9H4A4	2	2	79.96	1.20024	Huh7	HLE	Aminopeptidase B OS=Homo sapiens GN=RNPEP PE=1 SV=2 - [AMPB_HUMAN]	0.000139201	6.16424e-05	RNP
P67809	5	3	461.53	1.19914	Huh7	HLE	Nuclease-sensitive element-binding protein 1 OS=Homo sapiens GN=YBX1 PE=1 SV=3 - [YBOX1_HUMAN]	0.0473213	0.0344904	YBX1
P26639	10	10	566.98	1.19899	Huh7	HLE	Threonine--tRNA ligase, cytoplasmic OS=Homo sapiens GN=TARS PE=1 SV=3 - [SYTC_HUMAN]	0.000123787	5.41426e-05	TARS
P51659	21	21	1712.5	1.19635	Huh7	HLE	Peroxisomal multifunctional enzyme type 2 OS=Homo sapiens GN=HSD17B4 PE=1 SV=3 - [DHB4_HUMAN]	0.000920773	0.000480941	HSD17B4
O60716	9	9	432.82	1.19513	Huh7	HLE	Catenin delta-1 OS=Homo sapiens GN=CTNND1 PE=1 SV=1 - [CTND1_HUMAN]	0.0299237	0.0210715	CTNND1
P17858	6	3	401.44	1.19434	Huh7	HLE	6-phosphofructokinase, liver type OS=Homo sapiens GN=PFKL PE=1 SV=6 - [K6PL_HUMAN]	0.0004686	0.000231834	PFKL
Q9NYB0	2	2	96.27	1.19217	Huh7	HLE	Telomeric repeat-binding factor 2-interacting protein 1 OS=Homo sapiens GN=TERF2IP PE=1 SV=1 - [TE2IP_HUMAN]	0.00346555	0.00205417	TERF2IP
P04075	16	13	1473.85	1.19196	Huh7	HLE	Fructose-bisphosphate aldolase A OS=Homo sapiens GN=ALDOA PE=1 SV=2 - [ALDOA_HUMAN]	0.0392701	0.0280978	ALDOA
P46781	10	10	551.86	1.19095	Huh7	HLE	40S ribosomal protein S9 OS=Homo sapiens GN=RPS9 PE=1 SV=3 - [RS9_HUMAN]	0.0224353	0.0154319	RPS9
Q9H845	3	3	146.28	1.18913	Huh7	HLE	Acyl-CoA dehydrogenase family member 9, mitochondrial OS=Homo sapiens GN=ACAD9 PE=1 SV=1 - [ACAD9_HUMAN]	0.00858768	0.0054425	ACAD9
P60866	5	5	495.31	1.18824	Huh7	HLE	40S ribosomal protein S20 OS=Homo sapiens GN=RPS20 PE=1 SV=1 - [RS20_HUMAN]	0.0373404	0.0266194	RPS20
P07954	7	7	564.39	1.1863	Huh7	HLE	Fumarate hydratase, mitochondrial OS=Homo sapiens GN=FH PE=1 SV=3 - [FUMH_HUMAN]	0.00471541	0.0028669	FH
Q9UBE0	9	9	484.9	1.1824	Huh7	HLE	SUMO-activating enzyme subunit 1 OS=Homo sapiens GN=SAE1 PE=1 SV=1 - [SAE1_HUMAN]	0.0196852	0.0133616	SAE1
P53992	7	7	340.94	1.18161	Huh7	HLE	Protein transport protein Sec24C OS=Homo sapiens GN=SEC24C PE=1 SV=3 - [SC24C_HUMAN]	0.0488961	0.0356915	SEC24C
P27635	6	6	658.87	1.18083	Huh7	HLE	60S ribosomal protein L10 OS=Homo sapiens GN=RPL10 PE=1 SV=4 - [RL10_HUMAN]	0.00237578	0.00134706	RPL10
P50395	18	12	1317.21	1.18044	Huh7	HLE	Rab GDP dissociation inhibitor beta OS=Homo sapiens GN=GDI2 PE=1 SV=2 - [GDIB_HUMAN]	0.00419604	0.00253593	GDI2
P61106	8	6	638.06	1.1754	Huh7	HLE	Ras-related protein Rab-14 OS=Homo sapiens GN=RAB14 PE=1 SV=4 - [RAB14_HUMAN]	0.0117659	0.00761477	RAB14
O75821	2	2	65.1	1.17271	Huh7	HLE	Eukaryotic translation initiation factor 3 subunit G OS=Homo sapiens GN=EIF3G PE=1 SV=2 - [EIF3G_HUMAN]	0.0232133	0.016012	EIF3G
Q13363	5	4	291.26	1.16578	Huh7	HLE	C-terminal-binding protein 1 OS=Homo sapiens GN=CTBP1 PE=1 SV=2 - [CTBP1_HUMAN]	0.00874062	0.00555846	CTBP1
Q14697	34	34	2396.62	1.16512	Huh7	HLE	Neutral alpha-glucosidase AB OS=Homo sapiens GN=GANAB PE=1 SV=3 - [GANAB_HUMAN]	0.000678166	0.000344129	GANAB
O95865	3	3	123.15	1.16298	Huh7	HLE	N(G),N(G)-dimethylarginine dimethylaminohydrolase 2 OS=Homo sapiens GN=DDAH2 PE=1 SV=1 - [DDAH2_HUMAN]	0.0132048	0.00862743	DDAH2
O00148	11	3	704.25	1.15898	Huh7	HLE	ATP-dependent RNA helicase DDX39A OS=Homo sapiens GN=DDX39A PE=1 SV=2 - [DX39A_HUMAN]	0.0493492	0.0360581	DDX39A
P60228	13	13	868.54	1.15756	Huh7	HLE	Eukaryotic translation initiation factor 3 subunit E OS=Homo sapiens GN=EIF3E PE=1 SV=1 - [EIF3E_HUMAN]	0.0176601	0.0118845	EIF3E
O14980	15	13	977.34	1.14951	Huh7	HLE	Exportin-1 OS=Homo sapiens GN=XPO1 PE=1 SV=1 - [XPO1_HUMAN]	0.00862583	0.00546981	XPO1
P23396	15	15	936.58	1.14809	Huh7	HLE	40S ribosomal protein S3 OS=Homo sapiens GN=RPS3 PE=1 SV=2 - [RS3_HUMAN]	0.0148287	0.00980359	RPS3
P31939	19	19	1091.92	1.14658	Huh7	HLE	Bifunctional purine biosynthesis protein PURH OS=Homo sapiens GN=ATIC PE=1 SV=3 - [PUR9_HUMAN]	0.041506	0.0298752	ATIC
Q15717	9	8	512.98	1.14423	Huh7	HLE	ELAV-like protein 1 OS=Homo sapiens GN=ELAVL1 PE=1 SV=2 - [ELAV1_HUMAN]	0.011561	0.00746537	ELAVL1
O95232	2	2	150.96	1.14418	Huh7	HLE	Luc7-like protein 3 OS=Homo sapiens GN=LUC7L3 PE=1 SV=2 - [LC7L3_HUMAN]	0.0303045	0.0213727	LUC7L3
P36776	8	7	341.89	1.14262	Huh7	HLE	Lon protease homolog, mitochondrial OS=Homo sapiens GN=LONP1 PE=1 SV=2 - [LONM_HUMAN]	0.0498618	0.0364507	LONP1
P50990	26	26	1807.66	1.13813	Huh7	HLE	T-complex protein 1 subunit theta OS=Homo sapiens GN=CCT8 PE=1 SV=4 - [TCPQ_HUMAN]	0.0244243	0.0169419	CCT8
Q08257	5	5	301.28	1.13788	Huh7	HLE	Quinone oxidoreductase OS=Homo sapiens GN=CRYZ PE=1 SV=1 - [QOR_HUMAN]	0.00651073	0.00405296	CRYZ
P33176	9	9	498.63	1.13684	Huh7	HLE	Kinesin-1 heavy chain OS=Homo sapiens GN=KIF5B PE=1 SV=1 - [KINH_HUMAN]	0.00276635	0.00160559	KIF5B
P78344	7	7	369.84	1.13553	Huh7	HLE	Eukaryotic translation initiation factor 4 gamma 2 OS=Homo sapiens GN=EIF4G2 PE=1 SV=1 - [IF4G2_HUMAN]	0.0213563	0.0146122	EIF4G2
P04040	5	5	309.4	1.11629	Huh7	HLE	Catalase OS=Homo sapiens GN=CAT PE=1 SV=3 - [CATA_HUMAN]	0.0301527	0.0212546	CAT
P47897	14	13	705.71	1.11328	Huh7	HLE	Glutamine--tRNA ligase OS=Homo sapiens GN=QARS PE=1 SV=1 - [SYQ_HUMAN]	0.0288943	0.0202732	QARS
Q06830	14	11	1079.3	1.11107	Huh7	HLE	Peroxiredoxin-1 OS=Homo sapiens GN=PRDX1 PE=1 SV=1 - [PRDX1_HUMAN]	0.0172124	0.0115457	PRDX1
Q13200	17	17	1004.89	1.10541	Huh7	HLE	26S proteasome non-ATPase regulatory subunit 2 OS=Homo sapiens GN=PSMD2 PE=1 SV=3 - [PSMD2_HUMAN]	0.0192495	0.0130379	PSMD2
P05198	10	10	584.86	1.09726	Huh7	HLE	Eukaryotic translation initiation factor 2 subunit 1 OS=Homo sapiens GN=EIF2S1 PE=1 SV=3 - [IF2A_HUMAN]	0.00514298	0.00314179	EIF2S1
Q14839	5	5	313.61	1.06969	Huh7	HLE	Chromodomain-helicase-DNA-binding protein 4 OS=Homo sapiens GN=CHD4 PE=1 SV=2 - [CHD4_HUMAN]	0.0227351	0.0156546	CHD4

## Sheet: Indistinct
Accession	Peptide.count	Unique.peptides	Confidence.score	Max.fold.change	Highest.mean.condition	Lowest.mean.condition	Description	p.ANOVA.FDR	p.ANOVA	Name		Consistently altered metabolic genes identified in human HCC that their encoded protein appear indistinctly expressed in HLE vs HUH7 HUH7 (n=26)									The most unchanged proteins (p>0.5). Among these are several ribosomal proteins (in red).
Q96HE7	6	6	423.77	1.12162	HLE	Huh7	ERO1-like protein alpha OS=Homo sapiens GN=ERO1L PE=1 SV=2 - [ERO1A_HUMAN]	0.0510426	0.0374436	ERO1L		RRM1									AH
P23921	6	6	359.8	1.16365	HLE	Huh7	Ribonucleoside-diphosphate reductase large subunit OS=Homo sapiens GN=RRM1 PE=1 SV=1 - [RIR1_HUMAN]	0.0512157	0.0375892	RRM1		ITPA		Proteins are selected based on p.ANOVA.FDR >0.05, total number = 475							AIFM1
P19022	2	2	54.97	1.19919	Huh7	HLE	Cadherin-2 OS=Homo sapiens GN=CDH2 PE=1 SV=4 - [CADH2_HUMAN]	0.0519133	0.0381388	CDH2		RRM2		The expression of these proteins did not significantly differ between the cell lines.							AIMP1
Q7Z2W9	2	2	75.17	1.35997	HLE	Huh7	39S ribosomal protein L21, mitochondrial OS=Homo sapiens GN=MRPL21 PE=1 SV=2 - [RM21_HUMAN]	0.054399	0.0400045	MRPL21		OAT									ALB
O43865	3	2	164.97	1.25022	HLE	Huh7	Putative adenosylhomocysteinase 2 OS=Homo sapiens GN=AHCYL1 PE=1 SV=2 - [SAHH2_HUMAN]	0.05502	0.0405132	AHCYL1		PPAT		For a full list of consistently altered metabolic targets in human HCC, including details of how the genes were selected,							AP3B1
Q01433	2	2	69.3	1.33103	Huh7	HLE	AMP deaminase 2 OS=Homo sapiens GN=AMPD2 PE=1 SV=2 - [AMPD2_HUMAN]	0.05502	0.0405079	AMPD2		CYCS		Nwosu et al 2017 CMGH. Table S1.		https://www.ncbi.nlm.nih.gov/pubmed/28840186					API5
P84077	10	2	580.79	1.97441	Huh7	HLE	ADP-ribosylation factor 1 OS=Homo sapiens GN=ARF1 PE=1 SV=2 - [ARF1_HUMAN]	0.05502	0.0405211	ARF1		CYB5A									ARHGDIA
P62081	8	7	530.56	1.12597	Huh7	HLE	40S ribosomal protein S7 OS=Homo sapiens GN=RPS7 PE=1 SV=1 - [RS7_HUMAN]	0.0553995	0.0408207	RPS7		PTGES3									ARL1
Q9BY32	2	2	113.12	1.26681	HLE	Huh7	Inosine triphosphate pyrophosphatase OS=Homo sapiens GN=ITPA PE=1 SV=2 - [ITPA_HUMAN]	0.0554407	0.0408712	ITPA		FXN									ARL6IP1
O60814	8	2	861.43	1.36552	HLE	Huh7	Histone H2B type 1-K OS=Homo sapiens GN=HIST1H2BK PE=1 SV=3 - [H2B1K_HUMAN]	0.0568476	0.0419393	HIST1H2BK		CLIC1									ASPH
P11021	32	31	3252.15	1.20456	Huh7	HLE	78 kDa glucose-regulated protein OS=Homo sapiens GN=HSPA5 PE=1 SV=2 - [GRP78_HUMAN]	0.0568476	0.0419496	HSPA5		COX5A									ATP2A2
Q7L1Q6	4	4	161.97	1.16656	HLE	Huh7	Basic leucine zipper and W2 domain-containing protein 1 OS=Homo sapiens GN=BZW1 PE=1 SV=1 - [BZW1_HUMAN]	0.0568721	0.0419884	BZW1		LBR									ATXN10
Q9P2I0	6	6	270.05	1.14487	Huh7	HLE	Cleavage and polyadenylation specificity factor subunit 2 OS=Homo sapiens GN=CPSF2 PE=1 SV=2 - [CPSF2_HUMAN]	0.0571003	0.0421775	CPSF2		ECHS1									AZGP1
Q00688	3	3	111.72	1.07393	HLE	Huh7	Peptidyl-prolyl cis-trans isomerase FKBP3 OS=Homo sapiens GN=FKBP3 PE=1 SV=1 - [FKBP3_HUMAN]	0.0580758	0.0429192	FKBP3		ALDH4A1									BAG6
P82650	2	2	98.96	1.2144	HLE	Huh7	28S ribosomal protein S22, mitochondrial OS=Homo sapiens GN=MRPS22 PE=1 SV=1 - [RT22_HUMAN]	0.0580895	0.0429504	MRPS22		MAT2A									BAX
P30048	7	7	464.21	1.17284	HLE	Huh7	Thioredoxin-dependent peroxide reductase, mitochondrial OS=Homo sapiens GN=PRDX3 PE=1 SV=3 - [PRDX3_HUMAN]	0.0581622	0.0430252	PRDX3		PAICS									BCLAF1
Q99439	5	4	372.47	1.09851	HLE	Huh7	Calponin-2 OS=Homo sapiens GN=CNN2 PE=1 SV=4 - [CNN2_HUMAN]	0.0582503	0.0431116	CNN2		SCP2									C22orf28
P61923	3	3	257.54	1.11108	Huh7	HLE	Coatomer subunit zeta-1 OS=Homo sapiens GN=COPZ1 PE=1 SV=1 - [COPZ1_HUMAN]	0.0584986	0.0433378	COPZ1		GART									CALR
P29692	8	8	679.61	1.19752	Huh7	HLE	Elongation factor 1-delta OS=Homo sapiens GN=EEF1D PE=1 SV=5 - [EF1D_HUMAN]	0.0586336	0.0434591	EEF1D		PON2									CAND1
Q92747	3	2	169.49	1.16646	Huh7	HLE	Actin-related protein 2/3 complex subunit 1A OS=Homo sapiens GN=ARPC1A PE=1 SV=2 - [ARC1A_HUMAN]	0.0586462	0.0434897	ARPC1A		TALDO1									CCDC58
Q12907	6	6	337.38	1.1417	HLE	Huh7	Vesicular integral-membrane protein VIP36 OS=Homo sapiens GN=LMAN2 PE=1 SV=1 - [LMAN2_HUMAN]	0.0586796	0.0435358	LMAN2		PDXK									CDK1
Q9BYD6	5	5	225.06	1.12716	HLE	Huh7	39S ribosomal protein L1, mitochondrial OS=Homo sapiens GN=MRPL1 PE=1 SV=2 - [RM01_HUMAN]	0.0587764	0.0436289	MRPL1		HSD17B10									CIAO1
Q9UIG0	4	4	192.73	1.32653	HLE	Huh7	Tyrosine-protein kinase BAZ1B OS=Homo sapiens GN=BAZ1B PE=1 SV=2 - [BAZ1B_HUMAN]	0.0589852	0.0438054	BAZ1B		PGLS									CLU
P35637	7	6	614.63	1.14303	HLE	Huh7	RNA-binding protein FUS OS=Homo sapiens GN=FUS PE=1 SV=1 - [FUS_HUMAN]	0.0602468	0.044786	FUS		GLRX3									COPS5
P06899	8	2	831.29	1.37823	HLE	Huh7	Histone H2B type 1-J OS=Homo sapiens GN=HIST1H2BJ PE=1 SV=3 - [H2B1J_HUMAN]	0.0615486	0.0458208	HIST1H2BJ		DERA									COPS6
P61964	3	3	166.9	1.12161	HLE	Huh7	WD repeat-containing protein 5 OS=Homo sapiens GN=WDR5 PE=1 SV=1 - [WDR5_HUMAN]	0.0616624	0.0459278	WDR5		ATP2A2									COX4I1
P42677	2	2	103.18	1.16607	Huh7	HLE	40S ribosomal protein S27 OS=Homo sapiens GN=RPS27 PE=1 SV=3 - [RS27_HUMAN]	0.0624188	0.0465139	RPS27											CSTB
Q15181	7	6	412.97	1.17293	Huh7	HLE	Inorganic pyrophosphatase OS=Homo sapiens GN=PPA1 PE=1 SV=2 - [IPYR_HUMAN]	0.0625085	0.0466035	PPA1											DDX42
P20339	5	2	353.36	1.23674	HLE	Huh7	Ras-related protein Rab-5A OS=Homo sapiens GN=RAB5A PE=1 SV=2 - [RAB5A_HUMAN]	0.063019	0.0470298	RAB5A											DDX6
P62263	6	5	409.93	1.19249	Huh7	HLE	40S ribosomal protein S14 OS=Homo sapiens GN=RPS14 PE=1 SV=3 - [RS14_HUMAN]	0.0642903	0.0480018	RPS14											DERA
P68431	5	2	350.27	1.80553	HLE	Huh7	Histone H3.1 OS=Homo sapiens GN=HIST1H3A PE=1 SV=2 - [H31_HUMAN]	0.0643993	0.0481767	HIST1H3A											DNAJC13
Q53GQ0	4	4	184.18	1.15548	Huh7	HLE	Estradiol 17-beta-dehydrogenase 12 OS=Homo sapiens GN=HSD17B12 PE=1 SV=2 - [DHB12_HUMAN]	0.0643993	0.0481559	HSD17B12											EIF2S2
P62136	14	3	1031.7	1.24563	Huh7	HLE	Serine/threonine-protein phosphatase PP1-alpha catalytic subunit OS=Homo sapiens GN=PPP1CA PE=1 SV=1 - [PP1A_HUMAN]	0.0647706	0.048478	PPP1CA											EIF2S3
P04844	17	17	1252.08	1.11852	HLE	Huh7	Dolichyl-diphosphooligosaccharide--protein glycosyltransferase subunit 2 OS=Homo sapiens GN=RPN2 PE=1 SV=3 - [RPN2_HUMAN]	0.0647731	0.0485034	RPN2											EIF3A
P48634	2	2	68.02	1.47969	Huh7	HLE	Protein PRRC2A OS=Homo sapiens GN=PRRC2A PE=1 SV=3 - [PRC2A_HUMAN]	0.0651249	0.0487905	PRRC2A											EIF3B
P30050	7	7	615.68	1.11698	Huh7	HLE	60S ribosomal protein L12 OS=Homo sapiens GN=RPL12 PE=1 SV=1 - [RL12_HUMAN]	0.0654342	0.049046	RPL12											EIF3C
P41250	13	13	845.58	1.16324	HLE	Huh7	Glycine--tRNA ligase OS=Homo sapiens GN=GARS PE=1 SV=3 - [SYG_HUMAN]	0.0669777	0.0502515	GARS											EIF3F
Q9UKK9	2	2	238.37	1.25576	Huh7	HLE	ADP-sugar pyrophosphatase OS=Homo sapiens GN=NUDT5 PE=1 SV=1 - [NUDT5_HUMAN]	0.0681973	0.0513151	NUDT5											EIF3K
P08238	43	24	4406.58	1.13694	HLE	Huh7	Heat shock protein HSP 90-beta OS=Homo sapiens GN=HSP90AB1 PE=1 SV=4 - [HS90B_HUMAN]	0.0681973	0.0513138	HSP90AB1											EIF3L
Q9Y230	13	13	947.02	1.1015	HLE	Huh7	RuvB-like 2 OS=Homo sapiens GN=RUVBL2 PE=1 SV=3 - [RUVB2_HUMAN]	0.0693328	0.052245	RUVBL2											EXOSC8
Q9NTJ5	3	2	165.26	1.25071	HLE	Huh7	Phosphatidylinositide phosphatase SAC1 OS=Homo sapiens GN=SACM1L PE=1 SV=2 - [SAC1_HUMAN]	0.0701318	0.0529234	SACM1L											EZR
P62917	9	9	658.06	1.08086	Huh7	HLE	60S ribosomal protein L8 OS=Homo sapiens GN=RPL8 PE=1 SV=2 - [RL8_HUMAN]	0.0701515	0.0529638	RPL8											FAU
Q13616	2	2	91.25	1.33442	Huh7	HLE	Cullin-1 OS=Homo sapiens GN=CUL1 PE=1 SV=2 - [CUL1_HUMAN]	0.0705565	0.0532952	CUL1											FIP1L1
Q9BPX5	2	2	109.11	1.16334	Huh7	HLE	Actin-related protein 2/3 complex subunit 5-like protein OS=Homo sapiens GN=ARPC5L PE=1 SV=1 - [ARP5L_HUMAN]	0.07076	0.0534745	ARPC5L											FLII
O75694	9	9	580.06	1.18646	Huh7	HLE	Nuclear pore complex protein Nup155 OS=Homo sapiens GN=NUP155 PE=1 SV=1 - [NU155_HUMAN]	0.072224	0.0546858	NUP155											FUBP3
P31350	2	2	47.21	1.36797	HLE	Huh7	Ribonucleoside-diphosphate reductase subunit M2 OS=Homo sapiens GN=RRM2 PE=1 SV=1 - [RIR2_HUMAN]	0.072764	0.0551211	RRM2											GART
P24390	2	2	83.65	1.53606	HLE	Huh7	ER lumen protein retaining receptor 1 OS=Homo sapiens GN=KDELR1 PE=1 SV=1 - [ERD21_HUMAN]	0.0727734	0.0551546	KDELR1											GEMIN5
Q9UHD1	3	3	256.73	1.20879	HLE	Huh7	Cysteine and histidine-rich domain-containing protein 1 OS=Homo sapiens GN=CHORDC1 PE=1 SV=2 - [CHRD1_HUMAN]	0.0728683	0.055253	CHORDC1											GLRX3
P04181	12	12	710.8	1.12458	Huh7	HLE	Ornithine aminotransferase, mitochondrial OS=Homo sapiens GN=OAT PE=1 SV=1 - [OAT_HUMAN]	0.0732682	0.0556093	OAT											GLRX5
P11279	3	3	162.35	1.20211	Huh7	HLE	Lysosome-associated membrane glycoprotein 1 OS=Homo sapiens GN=LAMP1 PE=1 SV=3 - [LAMP1_HUMAN]	0.0737979	0.0560649	LAMP1											GOLGA2
Q9UQ80	15	15	892.38	1.08695	HLE	Huh7	Proliferation-associated protein 2G4 OS=Homo sapiens GN=PA2G4 PE=1 SV=3 - [PA2G4_HUMAN]	0.0754907	0.0574058	PA2G4											GSTK1
P33993	16	16	1058.04	1.12369	Huh7	HLE	DNA replication licensing factor MCM7 OS=Homo sapiens GN=MCM7 PE=1 SV=4 - [MCM7_HUMAN]	0.0756077	0.0575223	MCM7											HNRNPA0
Q06203	3	3	70.79	1.14688	HLE	Huh7	Amidophosphoribosyltransferase OS=Homo sapiens GN=PPAT PE=1 SV=1 - [PUR1_HUMAN]	0.0770592	0.0586825	PPAT											HNRNPA1
P17987	21	21	1542.53	1.15477	Huh7	HLE	T-complex protein 1 subunit alpha OS=Homo sapiens GN=TCP1 PE=1 SV=1 - [TCPA_HUMAN]	0.0778492	0.0593124	TCP1											HNRNPC
P14866	15	14	1003.53	1.11685	HLE	Huh7	Heterogeneous nuclear ribonucleoprotein L OS=Homo sapiens GN=HNRNPL PE=1 SV=2 - [HNRPL_HUMAN]	0.0785958	0.0599382	HNRNPL											HNRNPM
P26641	18	17	1602.82	1.10229	Huh7	HLE	Elongation factor 1-gamma OS=Homo sapiens GN=EEF1G PE=1 SV=3 - [EF1G_HUMAN]	0.0790817	0.0603375	EEF1G											HSD17B10
Q15459	10	10	602.2	1.12464	HLE	Huh7	Splicing factor 3A subunit 1 OS=Homo sapiens GN=SF3A1 PE=1 SV=1 - [SF3A1_HUMAN]	0.0795922	0.0607559	SF3A1											ILF2
Q9UBT2	8	8	495.31	1.07718	Huh7	HLE	SUMO-activating enzyme subunit 2 OS=Homo sapiens GN=UBA2 PE=1 SV=2 - [SAE2_HUMAN]	0.0798719	0.0610273	UBA2											ILVBL
Q9NS69	3	3	254.87	1.17399	HLE	Huh7	Mitochondrial import receptor subunit TOM22 homolog OS=Homo sapiens GN=TOMM22 PE=1 SV=3 - [TOM22_HUMAN]	0.0804314	0.061484	TOMM22											IPO9
P62701	13	13	1025.61	1.12157	Huh7	HLE	40S ribosomal protein S4, X isoform OS=Homo sapiens GN=RPS4X PE=1 SV=2 - [RS4X_HUMAN]	0.0811815	0.0621164	RPS4X											KDM1A
P46108	3	3	182.55	1.15698	Huh7	HLE	Adapter molecule crk OS=Homo sapiens GN=CRK PE=1 SV=2 - [CRK_HUMAN]	0.0825427	0.063205	CRK											KHDRBS1
P50914	3	3	329.12	1.13803	HLE	Huh7	60S ribosomal protein L14 OS=Homo sapiens GN=RPL14 PE=1 SV=4 - [RL14_HUMAN]	0.0825427	0.0632178	RPL14											KPRP
Q8TC07	3	2	93.19	1.21503	Huh7	HLE	TBC1 domain family member 15 OS=Homo sapiens GN=TBC1D15 PE=1 SV=2 - [TBC15_HUMAN]	0.0830568	0.0636718	TBC1D15											KRT1
P61201	3	3	112.76	1.10589	Huh7	HLE	COP9 signalosome complex subunit 2 OS=Homo sapiens GN=COPS2 PE=1 SV=1 - [CSN2_HUMAN]	0.0830568	0.0636497	COPS2											KRT10
P62805	12	12	1269.35	1.27287	HLE	Huh7	Histone H4 OS=Homo sapiens GN=HIST1H4A PE=1 SV=2 - [H4_HUMAN]	0.0830609	0.0637052	HIST1H4A											KRT14
P99999	4	3	231.44	1.48085	HLE	Huh7	Cytochrome c OS=Homo sapiens GN=CYCS PE=1 SV=2 - [CYC_HUMAN]	0.0843597	0.0647319	CYCS											KRT16
Q13155	5	5	282.09	1.0971	Huh7	HLE	Aminoacyl tRNA synthase complex-interacting multifunctional protein 2 OS=Homo sapiens GN=AIMP2 PE=1 SV=2 - [AIMP2_HUMAN]	0.0845599	0.0649162	AIMP2											KRT17
Q01130	2	2	175.05	1.23749	Huh7	HLE	Serine/arginine-rich splicing factor 2 OS=Homo sapiens GN=SRSF2 PE=1 SV=4 - [SRSF2_HUMAN]	0.0856587	0.065822	SRSF2											KRT5
Q9Y394	2	2	113.33	1.12698	Huh7	HLE	Dehydrogenase/reductase SDR family member 7 OS=Homo sapiens GN=DHRS7 PE=1 SV=1 - [DHRS7_HUMAN]	0.0857754	0.0659427	DHRS7											KRT6A
Q9ULW0	3	3	114.46	1.14861	HLE	Huh7	Targeting protein for Xklp2 OS=Homo sapiens GN=TPX2 PE=1 SV=2 - [TPX2_HUMAN]	0.0858121	0.0660021	TPX2											KRT9
Q92530	2	2	53.81	1.15567	Huh7	HLE	Proteasome inhibitor PI31 subunit OS=Homo sapiens GN=PSMF1 PE=1 SV=2 - [PSMF1_HUMAN]	0.0864473	0.0665534	PSMF1											LIMA1
P01859	2	2	84.93	1.394	HLE	Huh7	Ig gamma-2 chain C region OS=Homo sapiens GN=IGHG2 PE=1 SV=2 - [IGHG2_HUMAN]	0.0866076	0.0667083	IGHG2											LSM12
O14818	11	11	753.01	1.07528	HLE	Huh7	Proteasome subunit alpha type-7 OS=Homo sapiens GN=PSMA7 PE=1 SV=1 - [PSA7_HUMAN]	0.0878878	0.0677977	PSMA7											LSM2
P68363	37	3	3513.69	1.16612	HLE	Huh7	Tubulin alpha-1B chain OS=Homo sapiens GN=TUBA1B PE=1 SV=1 - [TBA1B_HUMAN]	0.0881526	0.0680583	TUBA1B											MAPK14
P00167	2	2	58.63	1.39161	Huh7	HLE	Cytochrome b5 OS=Homo sapiens GN=CYB5A PE=1 SV=2 - [CYB5_HUMAN]	0.0883141	0.068215	CYB5A											MARS
O75494	3	2	159.81	1.20159	HLE	Huh7	Serine/arginine-rich splicing factor 10 OS=Homo sapiens GN=SRSF10 PE=1 SV=1 - [SRS10_HUMAN]	0.0896535	0.0692821	SRSF10											MCM2
Q12849	2	2	91.97	1.18586	Huh7	HLE	G-rich sequence factor 1 OS=Homo sapiens GN=GRSF1 PE=1 SV=3 - [GRSF1_HUMAN]	0.0901255	0.0696796	GRSF1											MCM6
Q7KZ85	7	5	326.74	1.12847	Huh7	HLE	Transcription elongation factor SPT6 OS=Homo sapiens GN=SUPT6H PE=1 SV=2 - [SPT6H_HUMAN]	0.0905175	0.0700155	SUPT6H											METAP2
Q9NUP9	2	2	115.18	1.28416	HLE	Huh7	Protein lin-7 homolog C OS=Homo sapiens GN=LIN7C PE=1 SV=1 - [LIN7C_HUMAN]	0.0907904	0.0702596	LIN7C											MIA3
P49721	4	4	217.55	1.11949	HLE	Huh7	Proteasome subunit beta type-2 OS=Homo sapiens GN=PSMB2 PE=1 SV=1 - [PSB2_HUMAN]	0.0927641	0.0718206	PSMB2											MOV10
Q96DV4	3	3	128.47	1.12513	HLE	Huh7	39S ribosomal protein L38, mitochondrial OS=Homo sapiens GN=MRPL38 PE=1 SV=2 - [RM38_HUMAN]	0.0929457	0.0719949	MRPL38											MPDU1
P61604	7	7	535.13	1.16559	HLE	Huh7	10 kDa heat shock protein, mitochondrial OS=Homo sapiens GN=HSPE1 PE=1 SV=2 - [CH10_HUMAN]	0.0931096	0.0721557	HS1											MRPS28
Q12792	5	4	444.55	1.14611	HLE	Huh7	Twinfilin-1 OS=Homo sapiens GN=TWF1 PE=1 SV=3 - [TWF1_HUMAN]	0.093376	0.0723961	TWF1											MYCBP
P20618	7	7	604.29	1.10156	HLE	Huh7	Proteasome subunit beta type-1 OS=Homo sapiens GN=PSMB1 PE=1 SV=2 - [PSB1_HUMAN]	0.0945457	0.0733716	PSMB1											NACA
Q9Y6M9	2	2	91.08	1.44468	HLE	Huh7	NADH dehydrogenase [ubiquinone] 1 beta subcomplex subunit 9 OS=Homo sapiens GN=NDUFB9 PE=1 SV=3 - [NDUB9_HUMAN]	0.0978631	0.0760881	NDUFB9											NCAPD2
P43307	2	2	202.56	1.27016	HLE	Huh7	Translocon-associated protein subunit alpha OS=Homo sapiens GN=SSR1 PE=1 SV=3 - [SSRA_HUMAN]	0.100697	0.0783282	SSR1											NCAPG
Q9Y6G9	6	6	217.26	1.15909	Huh7	HLE	Cytoplasmic dynein 1 light intermediate chain 1 OS=Homo sapiens GN=DYNC1LI1 PE=1 SV=3 - [DC1L1_HUMAN]	0.101626	0.0790878	DYNC1LI1											NHP2L1
Q8NC51	5	5	209.73	1.11808	HLE	Huh7	Plasminogen activator inhibitor 1 RNA-binding protein OS=Homo sapiens GN=SERBP1 PE=1 SV=2 - [PAIRB_HUMAN]	0.107716	0.0841394	SERBP1											NUP107
Q01844	2	2	196.96	1.15022	Huh7	HLE	RNA-binding protein EWS OS=Homo sapiens GN=EWSR1 PE=1 SV=1 - [EWS_HUMAN]	0.108131	0.0845035	EWSR1											NUP54
Q9BQE3	34	4	3146.55	1.11127	Huh7	HLE	Tubulin alpha-1C chain OS=Homo sapiens GN=TUBA1C PE=1 SV=1 - [TBA1C_HUMAN]	0.108525	0.0849294	TUBA1C											NUP98
Q15185	5	5	361.61	1.19989	Huh7	HLE	Prostaglandin E synthase 3 OS=Homo sapiens GN=PTGES3 PE=1 SV=1 - [TEBP_HUMAN]	0.111453	0.0873934	PTGES3											PABPN1
P08107	24	22	1896.38	1.13149	HLE	Huh7	Heat shock 70 kDa protein 1A/1B OS=Homo sapiens GN=HSPA1A PE=1 SV=5 - [HSP71_HUMAN]	0.111912	0.0878237	HSPA1A											PAFAH1B1
Q9NSE4	8	7	508.47	1.1056	Huh7	HLE	Isoleucine--tRNA ligase, mitochondrial OS=Homo sapiens GN=IARS2 PE=1 SV=2 - [SYIM_HUMAN]	0.112279	0.0881526	IARS2											PDCD5
O15144	4	4	240.44	1.14425	HLE	Huh7	Actin-related protein 2/3 complex subunit 2 OS=Homo sapiens GN=ARPC2 PE=1 SV=1 - [ARPC2_HUMAN]	0.112566	0.0884186	ARPC2											PDHA1
P11177	6	6	285.18	1.14749	HLE	Huh7	Pyruvate dehydrogenase E1 component subunit beta, mitochondrial OS=Homo sapiens GN=PDHB PE=1 SV=3 - [ODPB_HUMAN]	0.114893	0.0902883	PDHB											PDXK
Q16595	2	2	113.01	1.2812	Huh7	HLE	Frataxin, mitochondrial OS=Homo sapiens GN=FXN PE=1 SV=2 - [FRDA_HUMAN]	0.115312	0.0906681	FXN											PGLS
P17612	2	2	97.49	1.26201	Huh7	HLE	cAMP-dependent protein kinase catalytic subunit alpha OS=Homo sapiens GN=PRKACA PE=1 SV=2 - [KAPCA_HUMAN]	0.115312	0.0907006	PRKACA											PON2
Q9Y3D9	3	3	126.3	1.13641	HLE	Huh7	28S ribosomal protein S23, mitochondrial OS=Homo sapiens GN=MRPS23 PE=1 SV=2 - [RT23_HUMAN]	0.119127	0.0937878	MRPS23											PPIB
Q13618	2	2	54.27	1.37952	Huh7	HLE	Cullin-3 OS=Homo sapiens GN=CUL3 PE=1 SV=2 - [CUL3_HUMAN]	0.121765	0.0959538	CUL3											PPID
P42126	5	5	321.7	1.08898	Huh7	HLE	Enoyl-CoA delta isomerase 1, mitochondrial OS=Homo sapiens GN=ECI1 PE=1 SV=1 - [ECI1_HUMAN]	0.123505	0.0974143	ECI1											PPP1R7
Q53GS9	6	6	428.86	1.11707	HLE	Huh7	U4/U6.U5 tri-snRNP-associated protein 2 OS=Homo sapiens GN=USP39 PE=1 SV=2 - [SNUT2_HUMAN]	0.12354	0.0974871	USP39											PPP4R1
Q9NTZ6	2	2	80.43	1.12158	HLE	Huh7	RNA-binding protein 12 OS=Homo sapiens GN=RBM12 PE=1 SV=1 - [RBM12_HUMAN]	0.125769	0.0994055	RBM12											PRKCSH
Q9BVK6	5	3	318.91	1.15614	Huh7	HLE	Transmembrane emp24 domain-containing protein 9 OS=Homo sapiens GN=TMED9 PE=1 SV=2 - [TMED9_HUMAN]	0.125769	0.0994281	TMED9											PRMT5
Q96IX5	2	2	181.04	1.18414	HLE	Huh7	Up-regulated during skeletal muscle growth protein 5 OS=Homo sapiens GN=USMG5 PE=1 SV=1 - [USMG5_HUMAN]	0.126595	0.100173	USMG5											PRPF40A
P62310	2	2	80.77	1.17136	HLE	Huh7	U6 snRNA-associated Sm-like protein LSm3 OS=Homo sapiens GN=LSM3 PE=1 SV=2 - [LSM3_HUMAN]	0.126632	0.100295	LSM3											PRRC1
P14923	9	6	466.54	1.24548	HLE	Huh7	Junction plakoglobin OS=Homo sapiens GN=JUP PE=1 SV=3 - [PLAK_HUMAN]	0.127167	0.10081	JUP											PSMA3
Q9BW27	2	2	112.09	1.15265	HLE	Huh7	Nuclear pore complex protein Nup85 OS=Homo sapiens GN=NUP85 PE=1 SV=1 - [NUP85_HUMAN]	0.127259	0.100929	NUP85											PSMB3
P62191	8	8	538.09	1.04019	HLE	Huh7	26S protease regulatory subunit 4 OS=Homo sapiens GN=PSMC1 PE=1 SV=1 - [PRS4_HUMAN]	0.127615	0.101272	PSMC1											PSMB6
P31943	16	7	1701.7	1.12015	Huh7	HLE	Heterogeneous nuclear ribonucleoprotein H OS=Homo sapiens GN=HNRNPH1 PE=1 SV=4 - [HNRH1_HUMAN]	0.128283	0.101881	HNRNPH1											PSMC4
Q12906	14	14	852.18	1.09834	Huh7	HLE	Interleukin enhancer-binding factor 3 OS=Homo sapiens GN=ILF3 PE=1 SV=3 - [ILF3_HUMAN]	0.129758	0.1031	ILF3											QKI
P62857	2	2	113.32	1.17227	Huh7	HLE	40S ribosomal protein S28 OS=Homo sapiens GN=RPS28 PE=1 SV=1 - [RS28_HUMAN]	0.129766	0.103153	RPS28											RAB21
P19404	3	3	113.6	1.18919	Huh7	HLE	NADH dehydrogenase [ubiquinone] flavoprotein 2, mitochondrial OS=Homo sapiens GN=NDUFV2 PE=1 SV=2 - [NDUV2_HUMAN]	0.130538	0.103862	NDUFV2											RANBP2
Q02543	9	9	542.53	1.1188	HLE	Huh7	60S ribosomal protein L18a OS=Homo sapiens GN=RPL18A PE=1 SV=2 - [RL18A_HUMAN]	0.130782	0.104104	RPL18A											RBM25
P18077	3	3	147.29	1.13123	HLE	Huh7	60S ribosomal protein L35a OS=Homo sapiens GN=RPL35A PE=1 SV=2 - [RL35A_HUMAN]	0.132027	0.105142	RPL35A											RDX
P24666	5	5	302.72	1.33822	Huh7	HLE	Low molecular weight phosphotyrosine protein phosphatase OS=Homo sapiens GN=ACP1 PE=1 SV=3 - [PPAC_HUMAN]	0.132119	0.105264	ACP1											RNPS1
P05783	30	29	2918.77	1.13805	HLE	Huh7	Keratin, type I cytoskeletal 18 OS=Homo sapiens GN=KRT18 PE=1 SV=2 - [K1C18_HUMAN]	0.132249	0.105415	KRT18											RPL10A
P23588	5	5	253.27	1.14646	Huh7	HLE	Eukaryotic translation initiation factor 4B OS=Homo sapiens GN=EIF4B PE=1 SV=2 - [IF4B_HUMAN]	0.133751	0.106661	EIF4B											RPL13
P0CW22	6	6	564.28	1.10067	Huh7	HLE	40S ribosomal protein S17-like OS=Homo sapiens GN=RPS17L PE=3 SV=1 - [RS17L_HUMAN]	0.134438	0.107258	RPS17L											RPL13A
P49589	2	2	99.81	1.12765	HLE	Huh7	Cysteine--tRNA ligase, cytoplasmic OS=Homo sapiens GN=CARS PE=1 SV=3 - [SYCC_HUMAN]	0.135345	0.10803	CARS											RPL15
P14550	6	5	278.3	1.08448	Huh7	HLE	Alcohol dehydrogenase [NADP(+)] OS=Homo sapiens GN=AKR1A1 PE=1 SV=3 - [AK1A1_HUMAN]	0.135559	0.10825	AKR1A1											RPL18
P46778	4	4	254.03	1.0931	HLE	Huh7	60S ribosomal protein L21 OS=Homo sapiens GN=RPL21 PE=1 SV=2 - [RL21_HUMAN]	0.135711	0.108421	RPL21											RPL19
O60216	3	3	155.56	1.12007	HLE	Huh7	Double-strand-break repair protein rad21 homolog OS=Homo sapiens GN=RAD21 PE=1 SV=2 - [RAD21_HUMAN]	0.136463	0.109072	RAD21											RPL23A
O15212	3	3	150.86	1.29129	HLE	Huh7	Prefoldin subunit 6 OS=Homo sapiens GN=PFDN6 PE=1 SV=1 - [PFD6_HUMAN]	0.136881	0.109455	PFDN6											RPL24
P51114	5	5	243.34	1.13326	HLE	Huh7	Fragile X mental retardation syndrome-related protein 1 OS=Homo sapiens GN=FXR1 PE=1 SV=3 - [FXR1_HUMAN]	0.137939	0.110351	FXR1											RPL26
P12273	3	3	148.79	2.48244	Huh7	HLE	Prolactin-inducible protein OS=Homo sapiens GN=PIP PE=1 SV=1 - [PIP_HUMAN]	0.139032	0.111276	PIP											RPL27
P62333	9	9	721.9	1.0781	Huh7	HLE	26S protease regulatory subunit 10B OS=Homo sapiens GN=PSMC6 PE=1 SV=1 - [PRS10_HUMAN]	0.141221	0.113131	PSMC6											RPL27A
P09661	7	7	476.25	1.06592	Huh7	HLE	U2 small nuclear ribonucleoprotein A' OS=Homo sapiens GN=SNRPA1 PE=1 SV=2 - [RU2A_HUMAN]	0.144189	0.115613	SNRPA1											RPL3
P28074	7	6	712.75	1.10776	Huh7	HLE	Proteasome subunit beta type-5 OS=Homo sapiens GN=PSMB5 PE=1 SV=3 - [PSB5_HUMAN]	0.14483	0.116232	PSMB5											RPL30
Q9P287	5	5	344.9	1.11023	Huh7	HLE	BRCA2 and CDKN1A-interacting protein OS=Homo sapiens GN=BCCIP PE=1 SV=1 - [BCCIP_HUMAN]	0.146692	0.11778	BCCIP											RPL32
O00571	16	15	1119.33	1.07362	Huh7	HLE	ATP-dependent RNA helicase DDX3X OS=Homo sapiens GN=DDX3X PE=1 SV=3 - [DDX3X_HUMAN]	0.146917	0.118014	DDX3X											RPL37A
P46939	4	4	137.17	1.09693	HLE	Huh7	Utrophin OS=Homo sapiens GN=UTRN PE=1 SV=2 - [UTRO_HUMAN]	0.147823	0.118795	UTRN											RPL4
P05386	2	2	240.34	1.12581	Huh7	HLE	60S acidic ribosomal protein P1 OS=Homo sapiens GN=RPLP1 PE=1 SV=1 - [RLA1_HUMAN]	0.150975	0.121438	RPLP1											RPL5
O43852	3	3	179.74	1.21086	Huh7	HLE	Calumenin OS=Homo sapiens GN=CALU PE=1 SV=2 - [CALU_HUMAN]	0.151029	0.121536	CALU											RPL9
P08621	3	3	154.18	1.24824	HLE	Huh7	U1 small nuclear ribonucleoprotein 70 kDa OS=Homo sapiens GN=SNRNP70 PE=1 SV=2 - [RU17_HUMAN]	0.152976	0.123214	SNRNP70											RPS13
Q9Y281	6	3	503.63	1.15502	HLE	Huh7	Cofilin-2 OS=Homo sapiens GN=CFL2 PE=1 SV=1 - [COF2_HUMAN]	0.155745	0.125612	CFL2											RPS16
P42766	3	3	306.73	1.10927	HLE	Huh7	60S ribosomal protein L35 OS=Homo sapiens GN=RPL35 PE=1 SV=2 - [RL35_HUMAN]	0.155745	0.125613	RPL35											RPS19
Q96AC1	5	5	239.02	1.33735	HLE	Huh7	Fermitin family homolog 2 OS=Homo sapiens GN=FERMT2 PE=1 SV=1 - [FERM2_HUMAN]	0.155798	0.125713	FERMT2											RPS26
Q9Y5J1	2	2	50.8	1.18154	HLE	Huh7	U3 small nucleolar RNA-associated protein 18 homolog OS=Homo sapiens GN=UTP18 PE=1 SV=3 - [UTP18_HUMAN]	0.15623	0.126213	UTP18											RPS3A
Q9HAV7	4	4	170.47	1.11097	HLE	Huh7	GrpE protein homolog 1, mitochondrial OS=Homo sapiens GN=GRPEL1 PE=1 SV=2 - [GRPE1_HUMAN]	0.15623	0.126184	GRL1											RPS6
Q8N1N4	5	5	238.8	2.99485	Huh7	HLE	Keratin, type II cytoskeletal 78 OS=Homo sapiens GN=KRT78 PE=2 SV=2 - [K2C78_HUMAN]	0.15623	0.126232	KRT78											RPS8
O00244	3	3	174	1.17255	HLE	Huh7	Copper transport protein ATOX1 OS=Homo sapiens GN=ATOX1 PE=1 SV=1 - [ATOX1_HUMAN]	0.156877	0.126925	ATOX1											SAR1B
Q9BQA1	4	4	251.41	1.10079	Huh7	HLE	Methylosome protein 50 OS=Homo sapiens GN=WDR77 PE=1 SV=1 - [MEP50_HUMAN]	0.156877	0.126882	WDR77											SARNP
O75534	14	13	664.92	1.14697	Huh7	HLE	Cold shock domain-containing protein E1 OS=Homo sapiens GN=CSDE1 PE=1 SV=2 - [CSDE1_HUMAN]	0.157002	0.127084	CSDE1											SCCPDH
Q9UNM6	9	9	479.31	1.08483	HLE	Huh7	26S proteasome non-ATPase regulatory subunit 13 OS=Homo sapiens GN=PSMD13 PE=1 SV=2 - [PSD13_HUMAN]	0.157388	0.12751	PSMD13											SCP2
Q8NI27	2	2	101.53	1.21101	HLE	Huh7	THO complex subunit 2 OS=Homo sapiens GN=THOC2 PE=1 SV=2 - [THOC2_HUMAN]	0.158764	0.128682	THOC2											SEL1L
Q6DD88	15	14	755.28	1.08084	HLE	Huh7	Atlastin-3 OS=Homo sapiens GN=ATL3 PE=1 SV=1 - [ATLA3_HUMAN]	0.161964	0.131452	ATL3											SF3B1
Q04760	3	3	310.25	1.12024	HLE	Huh7	Lactoylglutathione lyase OS=Homo sapiens GN=GLO1 PE=1 SV=4 - [LGUL_HUMAN]	0.164121	0.133323	GLO1											SF3B14
P63167	3	3	235.16	1.1144	HLE	Huh7	Dynein light chain 1, cytoplasmic OS=Homo sapiens GN=DYNLL1 PE=1 SV=1 - [DYL1_HUMAN]	0.164831	0.133959	DYNLL1											SLC25A11
O14929	7	6	330.84	1.10587	Huh7	HLE	Histone acetyltransferase type B catalytic subunit OS=Homo sapiens GN=HAT1 PE=1 SV=1 - [HAT1_HUMAN]	0.166224	0.135332	HAT1											SMC4
Q9GZS3	3	3	182.99	1.14248	HLE	Huh7	WD repeat-containing protein 61 OS=Homo sapiens GN=WDR61 PE=1 SV=1 - [WDR61_HUMAN]	0.171017	0.139421	WDR61											SMCHD1
Q00059	3	3	137.78	1.1953	HLE	Huh7	Transcription factor A, mitochondrial OS=Homo sapiens GN=TFAM PE=1 SV=1 - [TFAM_HUMAN]	0.171312	0.139724	TFAM											SNRPD2
Q96ST3	2	2	92.69	1.14731	Huh7	HLE	Paired amphipathic helix protein Sin3a OS=Homo sapiens GN=SIN3A PE=1 SV=2 - [SIN3A_HUMAN]	0.172005	0.140414	SIN3A											SNX5
Q14847	5	5	320.43	1.10872	HLE	Huh7	LIM and SH3 domain protein 1 OS=Homo sapiens GN=LASP1 PE=1 SV=2 - [LASP1_HUMAN]	0.173122	0.141389	LASP1											SRP9
O96028	2	2	113.51	1.16473	HLE	Huh7	Probable histone-lysine N-methyltransferase NSD2 OS=Homo sapiens GN=WHSC1 PE=1 SV=1 - [NSD2_HUMAN]	0.173954	0.142257	WHSC1											SRPRB
Q13123	4	4	182.86	1.19759	Huh7	HLE	Protein Red OS=Homo sapiens GN=IK PE=1 SV=3 - [RED_HUMAN]	0.174037	0.142388	IK											SRRM2
P61289	5	5	429.14	1.10507	Huh7	HLE	Proteasome activator complex subunit 3 OS=Homo sapiens GN=PSME3 PE=1 SV=1 - [PSME3_HUMAN]	0.175544	0.143685	PSME3											SRSF11
Q9Y5S9	3	3	168.13	1.11362	HLE	Huh7	RNA-binding protein 8A OS=Homo sapiens GN=RBM8A PE=1 SV=1 - [RBM8A_HUMAN]	0.176516	0.144608	RBM8A											SRSF3
Q9P0L0	5	4	394.1	1.21272	HLE	Huh7	Vesicle-associated membrane protein-associated protein A OS=Homo sapiens GN=VAPA PE=1 SV=3 - [VAPA_HUMAN]	0.176623	0.14476	VAPA											SRSF6
P0C0S5	5	3	322.24	1.22238	HLE	Huh7	Histone H2A.Z OS=Homo sapiens GN=H2AFZ PE=1 SV=2 - [H2AZ_HUMAN]	0.177374	0.145633	H2AFZ											SSU72
Q9UHV9	3	3	195.23	1.10816	HLE	Huh7	Prefoldin subunit 2 OS=Homo sapiens GN=PFDN2 PE=1 SV=1 - [PFD2_HUMAN]	0.177539	0.145833	PFDN2											STRAP
Q9NP97	3	3	215.58	1.13515	HLE	Huh7	Dynein light chain roadblock-type 1 OS=Homo sapiens GN=DYNLRB1 PE=1 SV=3 - [DLRB1_HUMAN]	0.17838	0.146674	DYNLRB1											SUPT16H
P55327	5	5	228.93	1.08765	HLE	Huh7	Tumor protein D52 OS=Homo sapiens GN=TPD52 PE=1 SV=2 - [TPD52_HUMAN]	0.17838	0.146718	TPD52											SUPT5H
P08758	18	18	1429.39	1.12159	Huh7	HLE	Annexin A5 OS=Homo sapiens GN=ANXA5 PE=1 SV=2 - [ANXA5_HUMAN]	0.17838	0.146629	ANXA5											SYNCRIP
O94905	4	3	203.92	1.13746	Huh7	HLE	Erlin-2 OS=Homo sapiens GN=ERLIN2 PE=1 SV=1 - [ERLN2_HUMAN]	0.178484	0.146869	ERLIN2											TAF9
Q02878	10	10	737.12	1.13882	HLE	Huh7	60S ribosomal protein L6 OS=Homo sapiens GN=RPL6 PE=1 SV=3 - [RL6_HUMAN]	0.178972	0.147335	RPL6											TALDO1
P30419	2	2	95.65	1.08236	HLE	Huh7	Glycylpeptide N-tetradecanoyltransferase 1 OS=Homo sapiens GN=NMT1 PE=1 SV=2 - [NMT1_HUMAN]	0.182419	0.150437	NMT1											TEX10
P55036	6	6	419.79	1.10753	HLE	Huh7	26S proteasome non-ATPase regulatory subunit 4 OS=Homo sapiens GN=PSMD4 PE=1 SV=1 - [PSMD4_HUMAN]	0.182459	0.150537	PSMD4											TMED10
Q14789	2	2	106.81	1.12279	Huh7	HLE	Golgin subfamily B member 1 OS=Homo sapiens GN=GOLGB1 PE=1 SV=2 - [GOGB1_HUMAN]	0.183835	0.151739	GOLGB1											TMEM214
Q13442	4	4	190.69	1.11792	Huh7	HLE	28 kDa heat- and acid-stable phosphoprotein OS=Homo sapiens GN=PDAP1 PE=1 SV=1 - [HAP28_HUMAN]	0.184078	0.152006	PDAP1											TMEM33
Q8TCT9	3	3	120.13	1.20028	HLE	Huh7	Minor histocompatibility antigen H13 OS=Homo sapiens GN=HM13 PE=1 SV=1 - [HM13_HUMAN]	0.184603	0.152507	HM13											TMOD3
P11142	36	28	3999.91	1.1186	HLE	Huh7	Heat shock cognate 71 kDa protein OS=Homo sapiens GN=HSPA8 PE=1 SV=1 - [HSP7C_HUMAN]	0.186864	0.154579	HSPA8											TOMM70A
Q8IYB3	2	2	148.9	1.22891	HLE	Huh7	Serine/arginine repetitive matrix protein 1 OS=Homo sapiens GN=SRRM1 PE=1 SV=2 - [SRRM1_HUMAN]	0.186923	0.154744	SRRM1											TPM3
Q16630	4	3	329.92	1.19875	HLE	Huh7	Cleavage and polyadenylation specificity factor subunit 6 OS=Homo sapiens GN=CPSF6 PE=1 SV=2 - [CPSF6_HUMAN]	0.1882	0.156025	CPSF6											TRA2B
P40925	6	5	383.25	1.09793	HLE	Huh7	Malate dehydrogenase, cytoplasmic OS=Homo sapiens GN=MDH1 PE=1 SV=4 - [MDHC_HUMAN]	0.1882	0.155961	MDH1											TXNL1
P46782	4	4	570.77	1.11116	Huh7	HLE	40S ribosomal protein S5 OS=Homo sapiens GN=RPS5 PE=1 SV=4 - [RS5_HUMAN]	0.192151	0.15944	RPS5											U2AF1
P18621	8	8	499.27	1.15566	Huh7	HLE	60S ribosomal protein L17 OS=Homo sapiens GN=RPL17 PE=1 SV=3 - [RL17_HUMAN]	0.194295	0.161431	RPL17											U2SURP
P30876	4	4	135.55	1.13117	HLE	Huh7	DNA-directed RNA polymerase II subunit RPB2 OS=Homo sapiens GN=POLR2B PE=1 SV=1 - [RPB2_HUMAN]	0.195878	0.162901	POLR2B											UBE2O
Q15417	7	6	474.46	1.07731	HLE	Huh7	Calponin-3 OS=Homo sapiens GN=CNN3 PE=1 SV=1 - [CNN3_HUMAN]	0.195878	0.162959	CNN3											UTP20
P26599	16	13	1707.51	1.07698	Huh7	HLE	Polypyrimidine tract-binding protein 1 OS=Homo sapiens GN=PTBP1 PE=1 SV=1 - [PTBP1_HUMAN]	0.204388	0.170336	PTBP1											WARS
Q7L2H7	4	4	162.38	1.11295	Huh7	HLE	Eukaryotic translation initiation factor 3 subunit M OS=Homo sapiens GN=EIF3M PE=1 SV=1 - [EIF3M_HUMAN]	0.204729	0.170694	EIF3M											WDR18
Q9UK76	2	2	110.96	1.10275	HLE	Huh7	Hematological and neurological expressed 1 protein OS=Homo sapiens GN=HN1 PE=1 SV=3 - [HN1_HUMAN]	0.205181	0.171146	HN1											XRCC5
Q9UBC2	2	2	87.4	1.19693	HLE	Huh7	Epidermal growth factor receptor substrate 15-like 1 OS=Homo sapiens GN=EPS15L1 PE=1 SV=1 - [EP15R_HUMAN]	0.207371	0.173123	EPS15L1
Q969V3	4	4	243.43	1.07056	Huh7	HLE	Nicalin OS=Homo sapiens GN=NCLN PE=1 SV=2 - [NCLN_HUMAN]	0.207371	0.173058	NCLN
Q9P289	4	2	206.42	1.20686	HLE	Huh7	Serine/threonine-protein kinase MST4 OS=Homo sapiens GN=MST4 PE=1 SV=2 - [MST4_HUMAN]	0.208827	0.17449	MST4
O00273	3	3	146.88	1.18242	HLE	Huh7	DNA fragmentation factor subunit alpha OS=Homo sapiens GN=DFFA PE=1 SV=1 - [DFFA_HUMAN]	0.208827	0.174456	DFFA
P18124	13	12	1004.9	1.07093	Huh7	HLE	60S ribosomal protein L7 OS=Homo sapiens GN=RPL7 PE=1 SV=1 - [RL7_HUMAN]	0.213171	0.178275	RPL7
P61586	6	4	355.12	1.26395	HLE	Huh7	Transforming protein RhoA OS=Homo sapiens GN=RHOA PE=1 SV=1 - [RHOA_HUMAN]	0.214951	0.179841	RHOA
P01023	15	15	855.93	1.82112	Huh7	HLE	Alpha-2-macroglobulin OS=Homo sapiens GN=A2M PE=1 SV=3 - [A2MG_HUMAN]	0.215792	0.180623	A2M
Q13243	3	2	132.65	1.20434	Huh7	HLE	Serine/arginine-rich splicing factor 5 OS=Homo sapiens GN=SRSF5 PE=1 SV=1 - [SRSF5_HUMAN]	0.216811	0.181633	SRSF5
P14678	5	5	222.38	1.08937	HLE	Huh7	Small nuclear ribonucleoprotein-associated proteins B and B' OS=Homo sapiens GN=SNRPB PE=1 SV=2 - [RSMB_HUMAN]	0.220692	0.185205	SNRPB
P49207	3	3	197	1.14881	HLE	Huh7	60S ribosomal protein L34 OS=Homo sapiens GN=RPL34 PE=1 SV=3 - [RL34_HUMAN]	0.222497	0.1868	RPL34
P16278	5	5	344.98	1.07796	HLE	Huh7	Beta-galactosidase OS=Homo sapiens GN=GLB1 PE=1 SV=2 - [BGAL_HUMAN]	0.224869	0.188955	GLB1
Q99567	2	2	67.88	1.10801	HLE	Huh7	Nuclear pore complex protein Nup88 OS=Homo sapiens GN=NUP88 PE=1 SV=2 - [NUP88_HUMAN]	0.228291	0.191958	NUP88
Q86UP2	11	11	730.14	1.0901	HLE	Huh7	Kinectin OS=Homo sapiens GN=KTN1 PE=1 SV=1 - [KTN1_HUMAN]	0.228576	0.192319	KTN1
Q99471	5	5	391.02	1.07546	HLE	Huh7	Prefoldin subunit 5 OS=Homo sapiens GN=PFDN5 PE=1 SV=2 - [PFD5_HUMAN]	0.231003	0.194445	PFDN5
P46060	10	10	660.15	1.07355	HLE	Huh7	Ran GTPase-activating protein 1 OS=Homo sapiens GN=RANGAP1 PE=1 SV=1 - [RAGP1_HUMAN]	0.233639	0.196834	RANGAP1
P78527	78	76	5625.36	1.07622	HLE	Huh7	DNA-dependent protein kinase catalytic subunit OS=Homo sapiens GN=PRKDC PE=1 SV=3 - [PRKDC_HUMAN]	0.236637	0.199445	PRKDC
Q9BXP5	8	8	406.78	1.10807	Huh7	HLE	Serrate RNA effector molecule homolog OS=Homo sapiens GN=SRRT PE=1 SV=1 - [SRRT_HUMAN]	0.237333	0.200118	SRRT
P62979	10	10	920.21	1.10619	HLE	Huh7	Ubiquitin-40S ribosomal protein S27a OS=Homo sapiens GN=RPS27A PE=1 SV=2 - [RS27A_HUMAN]	0.239212	0.201789	RPS27A
P62269	7	7	309.34	1.09703	Huh7	HLE	40S ribosomal protein S18 OS=Homo sapiens GN=RPS18 PE=1 SV=3 - [RS18_HUMAN]	0.244962	0.206906	RPS18
P10809	43	41	4427.63	1.07904	HLE	Huh7	60 kDa heat shock protein, mitochondrial OS=Homo sapiens GN=HSPD1 PE=1 SV=2 - [CH60_HUMAN]	0.245121	0.207129	HSPD1
Q06265	4	4	204.05	1.09431	HLE	Huh7	Exosome complex component RRP45 OS=Homo sapiens GN=EXOSC9 PE=1 SV=3 - [EXOS9_HUMAN]	0.245318	0.207385	EXOSC9
P56385	4	4	252.92	1.08775	Huh7	HLE	ATP synthase subunit e, mitochondrial OS=Homo sapiens GN=ATP5I PE=1 SV=2 - [ATP5I_HUMAN]	0.247656	0.209451	ATP5I
P15880	12	11	772.2	1.10169	Huh7	HLE	40S ribosomal protein S2 OS=Homo sapiens GN=RPS2 PE=1 SV=2 - [RS2_HUMAN]	0.248692	0.210418	RPS2
P35998	8	8	602.54	1.04206	Huh7	HLE	26S protease regulatory subunit 7 OS=Homo sapiens GN=PSMC2 PE=1 SV=3 - [PRS7_HUMAN]	0.255253	0.216062	PSMC2
P62304	5	5	273.18	1.07385	HLE	Huh7	Small nuclear ribonucleoprotein E OS=Homo sapiens GN=SNRPE PE=1 SV=1 - [RUXE_HUMAN]	0.258252	0.218882	SNR
Q9BXS5	5	5	180.82	1.09023	Huh7	HLE	AP-1 complex subunit mu-1 OS=Homo sapiens GN=AP1M1 PE=1 SV=3 - [AP1M1_HUMAN]	0.258902	0.219527	AP1M1
Q92544	5	5	261.93	1.09033	HLE	Huh7	Transmembrane 9 superfamily member 4 OS=Homo sapiens GN=TM9SF4 PE=1 SV=2 - [TM9S4_HUMAN]	0.259932	0.220548	TM9SF4
P62847	4	4	296.98	1.09616	Huh7	HLE	40S ribosomal protein S24 OS=Homo sapiens GN=RPS24 PE=1 SV=1 - [RS24_HUMAN]	0.261446	0.221968	RPS24
P25789	5	5	349.56	1.09997	HLE	Huh7	Proteasome subunit alpha type-4 OS=Homo sapiens GN=PSMA4 PE=1 SV=1 - [PSA4_HUMAN]	0.262025	0.222554	PSMA4
O15371	11	11	779.54	1.06095	Huh7	HLE	Eukaryotic translation initiation factor 3 subunit D OS=Homo sapiens GN=EIF3D PE=1 SV=1 - [EIF3D_HUMAN]	0.266628	0.226658	EIF3D
P04792	5	5	382.92	1.08434	HLE	Huh7	Heat shock protein beta-1 OS=Homo sapiens GN=HSPB1 PE=1 SV=2 - [HSPB1_HUMAN]	0.269071	0.228832	HSPB1
Q13347	7	7	536.94	1.05083	Huh7	HLE	Eukaryotic translation initiation factor 3 subunit I OS=Homo sapiens GN=EIF3I PE=1 SV=1 - [EIF3I_HUMAN]	0.270446	0.2301	EIF3I
P17980	9	9	552.04	1.08558	Huh7	HLE	26S protease regulatory subunit 6A OS=Homo sapiens GN=PSMC3 PE=1 SV=3 - [PRS6A_HUMAN]	0.270741	0.230484	PSMC3
P67870	2	2	75.52	1.11736	Huh7	HLE	Casein kinase II subunit beta OS=Homo sapiens GN=CSNK2B PE=1 SV=1 - [CSK2B_HUMAN]	0.272126	0.231924	CSNK2B
Q9UJS0	9	8	642.07	1.10714	HLE	Huh7	Calcium-binding mitochondrial carrier protein Aralar2 OS=Homo sapiens GN=SLC25A13 PE=1 SV=2 - [CMC2_HUMAN]	0.272126	0.231844	SLC25A13
P09496	2	2	111.9	1.10981	HLE	Huh7	Clathrin light chain A OS=Homo sapiens GN=CLTA PE=1 SV=1 - [CLCA_HUMAN]	0.273493	0.233189	CLTA
P20073	2	2	89.31	1.2943	HLE	Huh7	Annexin A7 OS=Homo sapiens GN=ANXA7 PE=1 SV=3 - [ANXA7_HUMAN]	0.275854	0.235402	ANXA7
O75643	26	26	1733.39	1.06394	HLE	Huh7	U5 small nuclear ribonucleoprotein 200 kDa helicase OS=Homo sapiens GN=SNRNP200 PE=1 SV=2 - [U520_HUMAN]	0.281851	0.240724	SNRNP200
Q93009	5	5	222.36	1.07896	HLE	Huh7	Ubiquitin carboxyl-terminal hydrolase 7 OS=Homo sapiens GN=USP7 PE=1 SV=2 - [UBP7_HUMAN]	0.284813	0.243461	USP7
Q9C0C2	3	3	87.96	1.17286	HLE	Huh7	182 kDa tankyrase-1-binding protein OS=Homo sapiens GN=TNKS1BP1 PE=1 SV=4 - [TB182_HUMAN]	0.290178	0.248152	TNKS1BP1
Q92797	2	2	42.2	1.1225	HLE	Huh7	Symplekin OS=Homo sapiens GN=SYMPK PE=1 SV=2 - [SYMPK_HUMAN]	0.293603	0.251288	SYMPK
P62424	12	12	1071.57	1.07023	HLE	Huh7	60S ribosomal protein L7a OS=Homo sapiens GN=RPL7A PE=1 SV=2 - [RL7A_HUMAN]	0.293603	0.251294	RPL7A
Q9Y696	4	4	213.95	1.04128	HLE	Huh7	Chloride intracellular channel protein 4 OS=Homo sapiens GN=CLIC4 PE=1 SV=4 - [CLIC4_HUMAN]	0.295946	0.253407	CLIC4
O00299	15	15	1352.98	1.09669	Huh7	HLE	Chloride intracellular channel protein 1 OS=Homo sapiens GN=CLIC1 PE=1 SV=4 - [CLIC1_HUMAN]	0.297855	0.255258	CLIC1
Q12769	2	2	70.53	1.09057	HLE	Huh7	Nuclear pore complex protein Nup160 OS=Homo sapiens GN=NUP160 PE=1 SV=3 - [NU160_HUMAN]	0.303506	0.26044	NUP160
Q8NFH3	2	2	141.36	1.08346	HLE	Huh7	Nucleoporin Nup43 OS=Homo sapiens GN=NUP43 PE=1 SV=1 - [NUP43_HUMAN]	0.309054	0.265641	NUP43
P20674	3	2	208.08	1.07681	HLE	Huh7	Cytochrome c oxidase subunit 5A, mitochondrial OS=Homo sapiens GN=COX5A PE=1 SV=2 - [COX5A_HUMAN]	0.310157	0.266702	COX5A
Q96A33	4	4	183.77	1.12411	Huh7	HLE	Coiled-coil domain-containing protein 47 OS=Homo sapiens GN=CCDC47 PE=1 SV=1 - [CCD47_HUMAN]	0.311813	0.268351	CCDC47
Q9UHX1	10	10	676.62	1.0622	HLE	Huh7	Poly(U)-binding-splicing factor PUF60 OS=Homo sapiens GN=PUF60 PE=1 SV=1 - [PUF60_HUMAN]	0.313764	0.270258	PUF60
Q9UJX3	2	2	70.23	1.14112	Huh7	HLE	Anaphase-promoting complex subunit 7 OS=Homo sapiens GN=ANAPC7 PE=1 SV=4 - [APC7_HUMAN]	0.317011	0.2734	ANAPC7
Q9NSD9	8	8	360.59	1.07654	Huh7	HLE	Phenylalanine--tRNA ligase beta subunit OS=Homo sapiens GN=FARSB PE=1 SV=3 - [SYFB_HUMAN]	0.317448	0.273893	FARSB
Q8TDN6	4	4	234.85	1.13048	HLE	Huh7	Ribosome biogenesis protein BRX1 homolog OS=Homo sapiens GN=BRIX1 PE=1 SV=2 - [BRX1_HUMAN]	0.320663	0.276783	BRIX1
P24928	4	4	157.46	1.1333	Huh7	HLE	DNA-directed RNA polymerase II subunit RPB1 OS=Homo sapiens GN=POLR2A PE=1 SV=2 - [RPB1_HUMAN]	0.32483	0.280498	POLR2A
Q04837	4	4	265.13	1.10677	HLE	Huh7	Single-stranded DNA-binding protein, mitochondrial OS=Homo sapiens GN=SSBP1 PE=1 SV=1 - [SSBP_HUMAN]	0.326725	0.282253	SSBP1
O00541	3	3	106.22	1.12807	HLE	Huh7	Pescadillo homolog OS=Homo sapiens GN=PES1 PE=1 SV=1 - [PESC_HUMAN]	0.330689	0.285917	S1
P61978	18	18	1696.32	1.06458	Huh7	HLE	Heterogeneous nuclear ribonucleoprotein K OS=Homo sapiens GN=HNRNPK PE=1 SV=1 - [HNRPK_HUMAN]	0.332188	0.287334	HNRNPK
Q86V81	4	4	514.1	1.09971	HLE	Huh7	THO complex subunit 4 OS=Homo sapiens GN=ALYREF PE=1 SV=3 - [THOC4_HUMAN]	0.338778	0.293156	ALYREF
Q9NR30	22	20	1383.35	1.05961	HLE	Huh7	Nucleolar RNA helicase 2 OS=Homo sapiens GN=DDX21 PE=1 SV=5 - [DDX21_HUMAN]	0.339027	0.293496	DDX21
Q9GZL7	2	2	101.21	1.10792	Huh7	HLE	Ribosome biogenesis protein WDR12 OS=Homo sapiens GN=WDR12 PE=1 SV=2 - [WDR12_HUMAN]	0.3415	0.295884	WDR12
O43148	2	2	58.01	1.10715	Huh7	HLE	mRNA cap guanine-N7 methyltransferase OS=Homo sapiens GN=RNMT PE=1 SV=1 - [MCES_HUMAN]	0.348461	0.302182	RNMT
P62913	5	5	348.97	1.06133	HLE	Huh7	60S ribosomal protein L11 OS=Homo sapiens GN=RPL11 PE=1 SV=2 - [RL11_HUMAN]	0.348461	0.30211	RPL11
P62280	6	6	335.88	1.09463	HLE	Huh7	40S ribosomal protein S11 OS=Homo sapiens GN=RPS11 PE=1 SV=3 - [RS11_HUMAN]	0.348461	0.302294	RPS11
Q9Y4P3	3	3	165.37	1.13077	Huh7	HLE	Transducin beta-like protein 2 OS=Homo sapiens GN=TBL2 PE=1 SV=1 - [TBL2_HUMAN]	0.348755	0.302676	TBL2
P62841	4	4	274.99	1.11362	Huh7	HLE	40S ribosomal protein S15 OS=Homo sapiens GN=RPS15 PE=1 SV=2 - [RS15_HUMAN]	0.353611	0.307404	RPS15
P02788	3	3	104.24	3.598	Huh7	HLE	Lactotransferrin OS=Homo sapiens GN=LTF PE=1 SV=6 - [TRFL_HUMAN]	0.359701	0.31309	LTF
P35908	33	23	2903	2.38357	Huh7	HLE	Keratin, type II cytoskeletal 2 epidermal OS=Homo sapiens GN=KRT2 PE=1 SV=2 - [K22E_HUMAN]	0.359748	0.313262	KRT2
Q14739	4	4	256.65	1.10597	Huh7	HLE	Lamin-B receptor OS=Homo sapiens GN=LBR PE=1 SV=2 - [LBR_HUMAN]	0.360316	0.314018	LBR
O95793	6	6	362.1	1.06081	HLE	Huh7	Double-stranded RNA-binding protein Staufen homolog 1 OS=Homo sapiens GN=STAU1 PE=1 SV=2 - [STAU1_HUMAN]	0.361979	0.315598	STAU1
Q13242	5	4	326.89	1.09217	Huh7	HLE	Serine/arginine-rich splicing factor 9 OS=Homo sapiens GN=SRSF9 PE=1 SV=1 - [SRSF9_HUMAN]	0.367932	0.321056	SRSF9
Q92896	10	10	598.89	1.04502	HLE	Huh7	Golgi apparatus protein 1 OS=Homo sapiens GN=GLG1 PE=1 SV=2 - [GSLG1_HUMAN]	0.371367	0.324457	GLG1
O95347	4	3	169.74	1.05145	HLE	Huh7	Structural maintenance of chromosomes protein 2 OS=Homo sapiens GN=SMC2 PE=1 SV=2 - [SMC2_HUMAN]	0.379904	0.332468	SMC2
Q9BWF3	5	4	405.93	1.12484	HLE	Huh7	RNA-binding protein 4 OS=Homo sapiens GN=RBM4 PE=1 SV=1 - [RBM4_HUMAN]	0.386268	0.338598	RBM4
Q00839	20	20	1765.91	1.05355	Huh7	HLE	Heterogeneous nuclear ribonucleoprotein U OS=Homo sapiens GN=HNRNPU PE=1 SV=6 - [HNRPU_HUMAN]	0.388379	0.34059	HNRNPU
Q9P2R7	2	2	119.37	1.07672	HLE	Huh7	Succinyl-CoA ligase [ADP-forming] subunit beta, mitochondrial OS=Homo sapiens GN=SUCLA2 PE=1 SV=3 - [SUCB1_HUMAN]	0.390722	0.343211	SUCLA2
P30084	10	10	882.84	1.05386	HLE	Huh7	Enoyl-CoA hydratase, mitochondrial OS=Homo sapiens GN=ECHS1 PE=1 SV=4 - [ECHM_HUMAN]	0.390722	0.342911	ECHS1
Q15393	23	23	1755.49	1.04678	HLE	Huh7	Splicing factor 3B subunit 3 OS=Homo sapiens GN=SF3B3 PE=1 SV=4 - [SF3B3_HUMAN]	0.393972	0.346496	SF3B3
Q14011	2	2	61.21	1.20415	HLE	Huh7	Cold-inducible RNA-binding protein OS=Homo sapiens GN=CIRBP PE=1 SV=1 - [CIRBP_HUMAN]	0.398133	0.350444	CIRBP
Q08554	2	2	95.59	2.17719	Huh7	HLE	Desmocollin-1 OS=Homo sapiens GN=DSC1 PE=1 SV=2 - [DSC1_HUMAN]	0.400504	0.352708	DSC1
P31944	3	3	192.54	3.71883	HLE	Huh7	Caspase-14 OS=Homo sapiens GN=CASP14 PE=1 SV=2 - [CASPE_HUMAN]	0.400504	0.352821	CASP14
P14406	2	2	127.27	1.06967	HLE	Huh7	Cytochrome c oxidase subunit 7A2, mitochondrial OS=Homo sapiens GN=COX7A2 PE=1 SV=1 - [CX7A2_HUMAN]	0.40278	0.354973	COX7A2
P35268	5	5	357.64	1.04592	Huh7	HLE	60S ribosomal protein L22 OS=Homo sapiens GN=RPL22 PE=1 SV=2 - [RL22_HUMAN]	0.403912	0.356263	RPL22
P62266	2	2	178.41	1.1038	HLE	Huh7	40S ribosomal protein S23 OS=Homo sapiens GN=RPS23 PE=1 SV=3 - [RS23_HUMAN]	0.404908	0.357289	RPS23
Q9Y224	4	4	288.79	1.04989	Huh7	HLE	UPF0568 protein C14orf166 OS=Homo sapiens GN=C14orf166 PE=1 SV=1 - [CN166_HUMAN]	0.405727	0.358254	C14orf166
P33991	18	18	1401.72	1.0493	Huh7	HLE	DNA replication licensing factor MCM4 OS=Homo sapiens GN=MCM4 PE=1 SV=5 - [MCM4_HUMAN]	0.405727	0.358307	MCM4
Q9Y3U8	3	3	115.53	1.09939	Huh7	HLE	60S ribosomal protein L36 OS=Homo sapiens GN=RPL36 PE=1 SV=3 - [RL36_HUMAN]	0.40748	0.360002	RPL36
O60841	6	6	296.89	1.04106	Huh7	HLE	Eukaryotic translation initiation factor 5B OS=Homo sapiens GN=EIF5B PE=1 SV=4 - [IF2P_HUMAN]	0.40885	0.361361	EIF5B
Q8IYS1	2	2	50.02	1.1111	HLE	Huh7	Peptidase M20 domain-containing protein 2 OS=Homo sapiens GN=PM20D2 PE=1 SV=2 - [P20D2_HUMAN]	0.410577	0.363037	PM20D2
Q2TAY7	5	5	280.3	1.08037	Huh7	HLE	WD40 repeat-containing protein SMU1 OS=Homo sapiens GN=SMU1 PE=1 SV=2 - [SMU1_HUMAN]	0.412672	0.365039	SMU1
O75608	3	3	164.66	1.07596	HLE	Huh7	Acyl-protein thioesterase 1 OS=Homo sapiens GN=LYPLA1 PE=1 SV=1 - [LYPA1_HUMAN]	0.41433	0.366655	LYPLA1
Q96PK6	6	6	458.93	1.10741	Huh7	HLE	RNA-binding protein 14 OS=Homo sapiens GN=RBM14 PE=1 SV=2 - [RBM14_HUMAN]	0.41932	0.371376	RBM14
P29508	2	2	64.06	14.1867	HLE	Huh7	Serpin B3 OS=Homo sapiens GN=SERPINB3 PE=1 SV=2 - [SPB3_HUMAN]	0.421205	0.373351	SERPINB3
Q08211	33	33	2306.84	1.05485	HLE	Huh7	ATP-dependent RNA helicase A OS=Homo sapiens GN=DHX9 PE=1 SV=4 - [DHX9_HUMAN]	0.421205	0.37321	DHX9
P62195	6	6	319.85	1.02168	HLE	Huh7	26S protease regulatory subunit 8 OS=Homo sapiens GN=PSMC5 PE=1 SV=1 - [PRS8_HUMAN]	0.421461	0.373732	PSMC5
Q93008	5	3	142.53	1.07412	HLE	Huh7	Probable ubiquitin carboxyl-terminal hydrolase FAF-X OS=Homo sapiens GN=USP9X PE=1 SV=3 - [USP9X_HUMAN]	0.422408	0.374724	USP9X
Q9NR31	6	4	288.05	1.07137	HLE	Huh7	GTP-binding protein SAR1a OS=Homo sapiens GN=SAR1A PE=1 SV=1 - [SAR1A_HUMAN]	0.425861	0.377942	SAR1A
Q6PKG0	2	2	94.63	1.05407	HLE	Huh7	La-related protein 1 OS=Homo sapiens GN=LARP1 PE=1 SV=2 - [LARP1_HUMAN]	0.428858	0.381069	LARP1
Q99848	2	2	112.92	1.14907	HLE	Huh7	Probable rRNA-processing protein EBP2 OS=Homo sapiens GN=EBNA1BP2 PE=1 SV=2 - [EBP2_HUMAN]	0.429363	0.381674	EBNA1BP2
P30038	3	3	129.87	1.05859	HLE	Huh7	Delta-1-pyrroline-5-carboxylate dehydrogenase, mitochondrial OS=Homo sapiens GN=ALDH4A1 PE=1 SV=3 - [AL4A1_HUMAN]	0.439191	0.390888	ALDH4A1
Q9Y285	3	3	282.59	1.03775	Huh7	HLE	Phenylalanine--tRNA ligase alpha subunit OS=Homo sapiens GN=FARSA PE=1 SV=3 - [SYFA_HUMAN]	0.446541	0.397916	FARSA
Q15003	3	3	101.15	1.06063	Huh7	HLE	Condensin complex subunit 2 OS=Homo sapiens GN=NCAPH PE=1 SV=3 - [CND2_HUMAN]	0.447198	0.398826	NCAPH
Q92820	5	5	322.79	1.04595	Huh7	HLE	Gamma-glutamyl hydrolase OS=Homo sapiens GN=GGH PE=1 SV=2 - [GGH_HUMAN]	0.450591	0.402015	GGH
Q92575	2	2	62.67	1.08112	HLE	Huh7	UBX domain-containing protein 4 OS=Homo sapiens GN=UBXN4 PE=1 SV=2 - [UBXN4_HUMAN]	0.456899	0.407975	UBXN4
O43324	3	3	129.05	1.06708	HLE	Huh7	Eukaryotic translation elongation factor 1 epsilon-1 OS=Homo sapiens GN=EEF1E1 PE=1 SV=1 - [MCA3_HUMAN]	0.461487	0.41224	EEF1E1
A5YKK6	8	8	344.41	1.05409	HLE	Huh7	CCR4-NOT transcription complex subunit 1 OS=Homo sapiens GN=CNOT1 PE=1 SV=2 - [CNOT1_HUMAN]	0.463422	0.414137	CNOT1
Q14498	4	4	333.5	1.10147	Huh7	HLE	RNA-binding protein 39 OS=Homo sapiens GN=RBM39 PE=1 SV=2 - [RBM39_HUMAN]	0.46468	0.415429	RBM39
P55060	20	19	1223.75	1.05052	Huh7	HLE	Exportin-2 OS=Homo sapiens GN=CSE1L PE=1 SV=3 - [XPO2_HUMAN]	0.476216	0.426088	CSE1L
Q08945	10	10	493.07	1.04836	HLE	Huh7	FACT complex subunit SSRP1 OS=Homo sapiens GN=SSRP1 PE=1 SV=1 - [SSRP1_HUMAN]	0.47703	0.426989	SSRP1
Q92841	20	15	1165.34	1.06345	Huh7	HLE	Probable ATP-dependent RNA helicase DDX17 OS=Homo sapiens GN=DDX17 PE=1 SV=2 - [DDX17_HUMAN]	0.477563	0.42764	DDX17
P31153	8	8	454.72	1.05372	Huh7	HLE	S-adenosylmethionine synthase isoform type-2 OS=Homo sapiens GN=MAT2A PE=1 SV=1 - [METK2_HUMAN]	0.481242	0.431109	MAT2A
O15145	4	4	210.08	1.05511	HLE	Huh7	Actin-related protein 2/3 complex subunit 3 OS=Homo sapiens GN=ARPC3 PE=1 SV=3 - [ARPC3_HUMAN]	0.489035	0.438445	ARPC3
Q9Y265	11	11	746.01	1.07468	Huh7	HLE	RuvB-like 1 OS=Homo sapiens GN=RUVBL1 PE=1 SV=1 - [RUVB1_HUMAN]	0.491345	0.440694	RUVBL1
P00387	7	7	534.44	1.0711	Huh7	HLE	NADH-cytochrome b5 reductase 3 OS=Homo sapiens GN=CYB5R3 PE=1 SV=3 - [NB5R3_HUMAN]	0.492032	0.44149	CYB5R3
P22234	16	16	1342.99	1.03029	HLE	Huh7	Multifunctional protein ADE2 OS=Homo sapiens GN=PAICS PE=1 SV=3 - [PUR6_HUMAN]	0.499328	0.448217	PAICS
Q05519	2	2	98.57	1.09549	Huh7	HLE	Serine/arginine-rich splicing factor 11 OS=Homo sapiens GN=SRSF11 PE=1 SV=1 - [SRS11_HUMAN]	0.503768	0.452751	SRSF11
P52272	19	19	1563.18	1.05511	Huh7	HLE	Heterogeneous nuclear ribonucleoprotein M OS=Homo sapiens GN=HNRNPM PE=1 SV=3 - [HNRPM_HUMAN]	0.503768	0.452432	HNRNPM
P55769	5	5	274.81	1.05008	Huh7	HLE	NHP2-like protein 1 OS=Homo sapiens GN=NHP2L1 PE=1 SV=3 - [NH2L1_HUMAN]	0.504516	0.45379	NHP2L1
P02768	19	19	1158.54	1.102	HLE	Huh7	Serum albumin OS=Homo sapiens GN=ALB PE=1 SV=2 - [ALBU_HUMAN]	0.504672	0.454113	ALB
Q96PU8	2	2	81.01	1.05804	HLE	Huh7	Protein quaking OS=Homo sapiens GN=QKI PE=1 SV=1 - [QKI_HUMAN]	0.507624	0.456954	QKI
O15042	2	2	110.74	1.06217	Huh7	HLE	U2 snRNP-associated SURP motif-containing protein OS=Homo sapiens GN=U2SURP PE=1 SV=2 - [SR140_HUMAN]	0.508472	0.457902	U2SURP
O75165	3	3	106.7	1.05406	HLE	Huh7	DnaJ homolog subfamily C member 13 OS=Homo sapiens GN=DNAJC13 PE=1 SV=5 - [DJC13_HUMAN]	0.51349	0.462793	DNAJC13
Q9UQ35	12	12	677.8	1.03677	HLE	Huh7	Serine/arginine repetitive matrix protein 2 OS=Homo sapiens GN=SRRM2 PE=1 SV=2 - [SRRM2_HUMAN]	0.513609	0.463087	SRRM2
P15311	19	11	1248.15	1.04444	HLE	Huh7	Ezrin OS=Homo sapiens GN=EZR PE=1 SV=4 - [EZRI_HUMAN]	0.515029	0.464554	EZR
P49458	3	3	222.5	1.03684	HLE	Huh7	Signal recognition particle 9 kDa protein OS=Homo sapiens GN=SRP9 PE=1 SV=2 - [SRP09_HUMAN]	0.515192	0.464888	SRP9
Q96I24	6	5	288.97	1.03049	Huh7	HLE	Far upstream element-binding protein 3 OS=Homo sapiens GN=FUBP3 PE=1 SV=2 - [FUBP3_HUMAN]	0.520435	0.470186	FUBP3
P22307	7	7	315.42	1.06287	Huh7	HLE	Non-specific lipid-transfer protein OS=Homo sapiens GN=SCP2 PE=1 SV=2 - [NLTP_HUMAN]	0.523272	0.473129	SCP2
P22102	15	15	862.68	1.02796	Huh7	HLE	Trifunctional purine biosynthetic protein adenosine-3 OS=Homo sapiens GN=GART PE=1 SV=1 - [PUR2_HUMAN]	0.527585	0.477603	GART
O00303	3	3	210.55	1.04578	HLE	Huh7	Eukaryotic translation initiation factor 3 subunit F OS=Homo sapiens GN=EIF3F PE=1 SV=1 - [EIF3F_HUMAN]	0.528723	0.478825	EIF3F
P43034	3	3	111.19	1.05166	HLE	Huh7	Platelet-activating factor acetylhydrolase IB subunit alpha OS=Homo sapiens GN=PAFAH1B1 PE=1 SV=2 - [LIS1_HUMAN]	0.529012	0.479279	PAFAH1B1
Q14566	17	17	1066.08	1.05316	Huh7	HLE	DNA replication licensing factor MCM6 OS=Homo sapiens GN=MCM6 PE=1 SV=1 - [MCM6_HUMAN]	0.530142	0.480495	MCM6
Q9NYL9	4	4	192.42	1.03695	HLE	Huh7	Tropomodulin-3 OS=Homo sapiens GN=TMOD3 PE=1 SV=1 - [TMOD3_HUMAN]	0.530355	0.480881	TMOD3
Q99417	2	2	92.74	1.05596	HLE	Huh7	C-Myc-binding protein OS=Homo sapiens GN=MYCBP PE=1 SV=3 - [MYCBP_HUMAN]	0.531149	0.481793	MYCBP
P62888	5	5	583.39	1.04068	Huh7	HLE	60S ribosomal protein L30 OS=Homo sapiens GN=RPL30 PE=1 SV=2 - [RL30_HUMAN]	0.531268	0.482095	RPL30
O14744	5	5	212.28	1.05273	Huh7	HLE	Protein arginine N-methyltransferase 5 OS=Homo sapiens GN=PRMT5 PE=1 SV=4 - [ANM5_HUMAN]	0.536539	0.487267	PRMT5
O75352	2	2	70.86	1.15629	Huh7	HLE	Mannose-P-dolichol utilization defect 1 protein OS=Homo sapiens GN=MPDU1 PE=1 SV=2 - [MPU1_HUMAN]	0.538732	0.489845	MPDU1
Q15021	2	2	57.85	1.04756	Huh7	HLE	Condensin complex subunit 1 OS=Homo sapiens GN=NCAPD2 PE=1 SV=3 - [CND1_HUMAN]	0.538732	0.489727	NCAPD2
Q8NBX0	5	5	187.49	1.04741	Huh7	HLE	Saccharopine dehydrogenase-like oxidoreductase OS=Homo sapiens GN=SCCPDH PE=1 SV=1 - [SCPDL_HUMAN]	0.541355	0.492427	SCCPDH
P32969	11	11	674.09	1.05918	Huh7	HLE	60S ribosomal protein L9 OS=Homo sapiens GN=RPL9 PE=1 SV=1 - [RL9_HUMAN]	0.541461	0.49272	RPL9
Q8TEQ6	8	8	463.9	1.04842	Huh7	HLE	Gem-associated protein 5 OS=Homo sapiens GN=GEMIN5 PE=1 SV=3 - [GEMI5_HUMAN]	0.543954	0.495186	GEMIN5
Q13765	8	8	678.52	1.03714	HLE	Huh7	Nascent polypeptide-associated complex subunit alpha OS=Homo sapiens GN=NACA PE=1 SV=1 - [NACA_HUMAN]	0.554118	0.504841	NACA
P62910	2	2	199.87	1.06272	HLE	Huh7	60S ribosomal protein L32 OS=Homo sapiens GN=RPL32 PE=1 SV=2 - [RL32_HUMAN]	0.559928	0.510337	RPL32
Q9UBV2	2	2	111.67	1.04431	HLE	Huh7	Protein sel-1 homolog 1 OS=Homo sapiens GN=SEL1L PE=1 SV=3 - [SE1L1_HUMAN]	0.561051	0.511768	SEL1L
Q86U42	4	4	256.93	1.04537	Huh7	HLE	Polyadenylate-binding protein 2 OS=Homo sapiens GN=PABPN1 PE=1 SV=3 - [PABP2_HUMAN]	0.56395	0.514617	PABPN1
P49755	6	6	485.06	1.04087	HLE	Huh7	Transmembrane emp24 domain-containing protein 10 OS=Homo sapiens GN=TMED10 PE=1 SV=2 - [TMEDA_HUMAN]	0.568108	0.51903	TMED10
P55884	10	10	703.35	1.03284	HLE	Huh7	Eukaryotic translation initiation factor 3 subunit B OS=Homo sapiens GN=EIF3B PE=1 SV=3 - [EIF3B_HUMAN]	0.56839	0.519494	EIF3B
Q15435	2	2	102.98	1.08086	Huh7	HLE	Protein phosphatase 1 regulatory subunit 7 OS=Homo sapiens GN=PPP1R7 PE=1 SV=1 - [PP1R7_HUMAN]	0.574296	0.525309	PPP1R7
P52948	4	4	149.75	1.03703	HLE	Huh7	Nuclear pore complex protein Nup98-Nup96 OS=Homo sapiens GN=NUP98 PE=1 SV=4 - [NUP98_HUMAN]	0.577283	0.52846	NUP98
Q15165	5	5	303.24	1.03443	Huh7	HLE	Serum paraoxonase/arylesterase 2 OS=Homo sapiens GN=PON2 PE=1 SV=3 - [PON2_HUMAN]	0.577527	0.528893	PON2
Q08752	2	2	108.2	1.03347	Huh7	HLE	Peptidyl-prolyl cis-trans isomerase D OS=Homo sapiens GN=PPID PE=1 SV=3 - [PPID_HUMAN]	0.578363	0.530079	PPID
Q6UN15	3	3	253.73	1.07188	Huh7	HLE	Pre-mRNA 3'-end-processing factor FIP1 OS=Homo sapiens GN=FIP1L1 PE=1 SV=1 - [FIP1_HUMAN]	0.578608	0.530514	FIP1L1
P62906	8	8	600.88	1.04588	Huh7	HLE	60S ribosomal protein L10a OS=Homo sapiens GN=RPL10A PE=1 SV=2 - [RL10A_HUMAN]	0.579953	0.532167	RPL10A
P61247	13	13	1311.23	1.05734	Huh7	HLE	40S ribosomal protein S3a OS=Homo sapiens GN=RPS3A PE=1 SV=2 - [RS3A_HUMAN]	0.580675	0.533235	RPS3A
Q9Y2Q9	2	2	105.81	1.07557	HLE	Huh7	28S ribosomal protein S28, mitochondrial OS=Homo sapiens GN=MRPS28 PE=1 SV=1 - [RT28_HUMAN]	0.581066	0.533822	MRPS28
P25788	4	3	213.72	1.03949	HLE	Huh7	Proteasome subunit alpha type-3 OS=Homo sapiens GN=PSMA3 PE=1 SV=2 - [PSA3_HUMAN]	0.582852	0.535885	PSMA3
P82979	4	4	332.41	1.03551	HLE	Huh7	SAP domain-containing ribonucleoprotein OS=Homo sapiens GN=SARNP PE=1 SV=3 - [SARNP_HUMAN]	0.585046	0.538115	SARNP
O60506	24	17	1431.7	1.03231	HLE	Huh7	Heterogeneous nuclear ribonucleoprotein Q OS=Homo sapiens GN=SYNCRIP PE=1 SV=2 - [HNRPQ_HUMAN]	0.586046	0.539247	SYNCRIP
Q9Y6B6	4	2	216.92	1.03829	HLE	Huh7	GTP-binding protein SAR1b OS=Homo sapiens GN=SAR1B PE=1 SV=1 - [SAR1B_HUMAN]	0.586472	0.539852	SAR1B
P43686	8	8	575.82	1.04098	HLE	Huh7	26S protease regulatory subunit 6B OS=Homo sapiens GN=PSMC4 PE=1 SV=2 - [PRS6B_HUMAN]	0.586657	0.540236	PSMC4
Q01081	2	2	133.78	1.05374	Huh7	HLE	Splicing factor U2AF 35 kDa subunit OS=Homo sapiens GN=U2AF1 PE=1 SV=3 - [U2AF1_HUMAN]	0.593496	0.54718	U2AF1
P35527	24	24	2355.53	1.4708	HLE	Huh7	Keratin, type I cytoskeletal 9 OS=Homo sapiens GN=KRT9 PE=1 SV=3 - [K1C9_HUMAN]	0.596808	0.55045	KRT9
O75400	6	6	295.64	1.03436	Huh7	HLE	Pre-mRNA-processing factor 40 homolog A OS=Homo sapiens GN=PRPF40A PE=1 SV=2 - [PR40A_HUMAN]	0.597135	0.550968	PRPF40A
P49736	16	16	1281.83	1.03379	Huh7	HLE	DNA replication licensing factor MCM2 OS=Homo sapiens GN=MCM2 PE=1 SV=4 - [MCM2_HUMAN]	0.598037	0.552017	MCM2
Q16539	2	2	74.32	1.05729	Huh7	HLE	Mitogen-activated protein kinase 14 OS=Homo sapiens GN=MAPK14 PE=1 SV=3 - [MK14_HUMAN]	0.609683	0.563519	MAPK14
Q9BPX3	2	2	109.1	1.0673	HLE	Huh7	Condensin complex subunit 3 OS=Homo sapiens GN=NCAPG PE=1 SV=1 - [CND3_HUMAN]	0.609683	0.563543	NCAPG
P84098	2	2	219.42	1.06008	Huh7	HLE	60S ribosomal protein L19 OS=Homo sapiens GN=RPL19 PE=1 SV=1 - [RL19_HUMAN]	0.609683	0.563724	RPL19
Q9Y262	13	13	941.43	1.03266	HLE	Huh7	Eukaryotic translation initiation factor 3 subunit L OS=Homo sapiens GN=EIF3L PE=1 SV=1 - [EIF3L_HUMAN]	0.610308	0.564673	EIF3L
Q14152	13	13	822.8	1.03226	Huh7	HLE	Eukaryotic translation initiation factor 3 subunit A OS=Homo sapiens GN=EIF3A PE=1 SV=1 - [EIF3A_HUMAN]	0.611335	0.565845	EIF3A
P37837	11	11	593.69	1.03773	HLE	Huh7	Transaldolase OS=Homo sapiens GN=TALDO1 PE=1 SV=2 - [TALDO_HUMAN]	0.614753	0.569232	TALDO1
P62995	6	6	601.75	1.04582	HLE	Huh7	Transformer-2 protein homolog beta OS=Homo sapiens GN=TRA2B PE=1 SV=1 - [TRA2B_HUMAN]	0.620277	0.574797	TRA2B
P13645	25	23	2737.06	2.06758	Huh7	HLE	Keratin, type I cytoskeletal 10 OS=Homo sapiens GN=KRT10 PE=1 SV=6 - [K1C10_HUMAN]	0.625441	0.580264	KRT10
Q9HCE1	7	7	322.84	1.03466	HLE	Huh7	Putative helicase MOV-10 OS=Homo sapiens GN=MOV10 PE=1 SV=2 - [MOV10_HUMAN]	0.62667	0.581883	MOV10
P41091	9	9	637.71	1.03103	HLE	Huh7	Eukaryotic translation initiation factor 2 subunit 3 OS=Homo sapiens GN=EIF2S3 PE=1 SV=3 - [IF2G_HUMAN]	0.62667	0.582087	EIF2S3
Q8TF05	2	2	126.94	1.03859	HLE	Huh7	Serine/threonine-protein phosphatase 4 regulatory subunit 1 OS=Homo sapiens GN=PPP4R1 PE=1 SV=1 - [PP4R1_HUMAN]	0.630032	0.585895	PPP4R1
O00764	3	3	108.9	1.05466	HLE	Huh7	Pyridoxal kinase OS=Homo sapiens GN=PDXK PE=1 SV=1 - [PDXK_HUMAN]	0.630032	0.585827	PDXK
P62277	11	11	762.4	1.03156	Huh7	HLE	40S ribosomal protein S13 OS=Homo sapiens GN=RPS13 PE=1 SV=2 - [RS13_HUMAN]	0.630988	0.587013	RPS13
Q96P70	3	2	183.81	1.0723	HLE	Huh7	Importin-9 OS=Homo sapiens GN=IPO9 PE=1 SV=3 - [IPO9_HUMAN]	0.631369	0.587597	IPO9
Q9Y5M8	8	8	631.94	1.035	HLE	Huh7	Signal recognition particle receptor subunit beta OS=Homo sapiens GN=SRPRB PE=1 SV=3 - [SRPRB_HUMAN]	0.635939	0.592081	SRPRB
Q96B26	3	3	190.05	1.03854	HLE	Huh7	Exosome complex component RRP43 OS=Homo sapiens GN=EXOSC8 PE=1 SV=1 - [EXOS8_HUMAN]	0.640178	0.596493	EXOSC8
P04080	2	2	150.86	1.03002	Huh7	HLE	Cystatin-B OS=Homo sapiens GN=CSTB PE=1 SV=2 - [CYTB_HUMAN]	0.646063	0.602914	CSTB
Q9NYF8	3	2	133.1	1.07304	HLE	Huh7	Bcl-2-associated transcription factor 1 OS=Homo sapiens GN=BCLAF1 PE=1 SV=2 - [BCLF1_HUMAN]	0.64941	0.606509	BCLAF1
P62861	2	2	155.36	1.055	Huh7	HLE	40S ribosomal protein S30 OS=Homo sapiens GN=FAU PE=1 SV=1 - [RS30_HUMAN]	0.650751	0.608233	FAU
Q9NTJ3	2	2	122.91	1.04097	HLE	Huh7	Structural maintenance of chromosomes protein 4 OS=Homo sapiens GN=SMC4 PE=1 SV=2 - [SMC4_HUMAN]	0.657815	0.615553	SMC4
P62854	3	3	260.41	1.03333	HLE	Huh7	40S ribosomal protein S26 OS=Homo sapiens GN=RPS26 PE=1 SV=3 - [RS26_HUMAN]	0.657815	0.615534	RPS26
Q9Y333	2	2	200.14	1.06092	Huh7	HLE	U6 snRNA-associated Sm-like protein LSm2 OS=Homo sapiens GN=LSM2 PE=1 SV=1 - [LSM2_HUMAN]	0.666847	0.624488	LSM2
O00203	5	5	179.5	1.0274	Huh7	HLE	AP-3 complex subunit beta-1 OS=Homo sapiens GN=AP3B1 PE=1 SV=3 - [AP3B1_HUMAN]	0.671079	0.628938	AP3B1
P02538	19	6	1521.38	3.12161	HLE	Huh7	Keratin, type II cytoskeletal 6A OS=Homo sapiens GN=KRT6A PE=1 SV=3 - [K2C6A_HUMAN]	0.671079	0.628867	KRT6A
P26196	7	7	385.74	1.03616	Huh7	HLE	Probable ATP-dependent RNA helicase DDX6 OS=Homo sapiens GN=DDX6 PE=1 SV=2 - [DDX6_HUMAN]	0.678514	0.6364	DDX6
P39019	7	7	517.45	1.02805	Huh7	HLE	40S ribosomal protein S19 OS=Homo sapiens GN=RPS19 PE=1 SV=2 - [RS19_HUMAN]	0.67884	0.636952	RPS19
Q99714	10	10	960.71	1.02989	HLE	Huh7	3-hydroxyacyl-CoA dehydrogenase type-2 OS=Homo sapiens GN=HSD17B10 PE=1 SV=3 - [HCD2_HUMAN]	0.680778	0.639017	HSD17B10
Q9UHB6	3	3	89.07	1.02478	HLE	Huh7	LIM domain and actin-binding protein 1 OS=Homo sapiens GN=LIMA1 PE=1 SV=1 - [LIMA1_HUMAN]	0.682874	0.641233	LIMA1
P56192	13	13	845.18	1.03511	Huh7	HLE	Methionine--tRNA ligase, cytoplasmic OS=Homo sapiens GN=MARS PE=1 SV=2 - [SYMC_HUMAN]	0.688329	0.646854	MARS
O95336	5	5	270.87	1.03485	Huh7	HLE	6-phosphogluconolactonase OS=Homo sapiens GN=PGLS PE=1 SV=2 - [6PGL_HUMAN]	0.691361	0.649955	PGLS
Q12797	3	3	171.22	1.0743	HLE	Huh7	Aspartyl/asparaginyl beta-hydroxylase OS=Homo sapiens GN=ASPH PE=1 SV=3 - [ASPH_HUMAN]	0.69207	0.650873	ASPH
Q12904	6	6	226.62	1.02045	HLE	Huh7	Aminoacyl tRNA synthase complex-interacting multifunctional protein 1 OS=Homo sapiens GN=AIMP1 PE=1 SV=2 - [AIMP1_HUMAN]	0.705627	0.664391	AIMP1
P06753	6	2	474.31	1.07474	HLE	Huh7	Tropomyosin alpha-3 chain OS=Homo sapiens GN=TPM3 PE=1 SV=2 - [TPM3_HUMAN]	0.705973	0.664973	TPM3
Q9Y5B9	10	10	513.29	1.04681	Huh7	HLE	FACT complex subunit SPT16 OS=Homo sapiens GN=SUPT16H PE=1 SV=1 - [SP16H_HUMAN]	0.709993	0.669274	SUPT16H
O43396	3	3	116.01	1.03578	Huh7	HLE	Thioredoxin-like protein 1 OS=Homo sapiens GN=TXNL1 PE=1 SV=3 - [TXNL1_HUMAN]	0.710797	0.670549	TXNL1
P25311	2	2	110.11	1.31825	Huh7	HLE	Zinc-alpha-2-glycoprotein OS=Homo sapiens GN=AZGP1 PE=1 SV=2 - [ZA2G_HUMAN]	0.714164	0.674503	AZGP1
Q07666	3	2	104.73	1.01507	Huh7	HLE	KH domain-containing, RNA-binding, signal transduction-associated protein 1 OS=Homo sapiens GN=KHDRBS1 PE=1 SV=1 - [KHDR1_HUMAN]	0.714441	0.675023	KHDRBS1
O94826	4	4	288.1	1.02557	HLE	Huh7	Mitochondrial import receptor subunit TOM70 OS=Homo sapiens GN=TOMM70A PE=1 SV=1 - [TOM70_HUMAN]	0.719107	0.679693	TOMM70A
Q86SX6	2	2	157.81	1.02382	HLE	Huh7	Glutaredoxin-related protein 5, mitochondrial OS=Homo sapiens GN=GLRX5 PE=1 SV=2 - [GLRX5_HUMAN]	0.726021	0.686756	GLRX5
O75691	2	2	112.54	1.05413	Huh7	HLE	Small subunit processome component 20 homolog OS=Homo sapiens GN=UTP20 PE=1 SV=3 - [UTP20_HUMAN]	0.727124	0.688327	UTP20
Q9UBQ5	7	7	316.6	1.02251	Huh7	HLE	Eukaryotic translation initiation factor 3 subunit K OS=Homo sapiens GN=EIF3K PE=1 SV=1 - [EIF3K_HUMAN]	0.727124	0.688302	EIF3K
Q07812	3	3	152.26	1.05069	Huh7	HLE	Apoptosis regulator BAX OS=Homo sapiens GN=BAX PE=1 SV=1 - [BAX_HUMAN]	0.728049	0.689467	BAX
P83731	8	8	635.48	1.01608	HLE	Huh7	60S ribosomal protein L24 OS=Homo sapiens GN=RPL24 PE=1 SV=1 - [RL24_HUMAN]	0.728812	0.690454	RPL24
P14314	14	13	853.72	1.03689	Huh7	HLE	Glucosidase 2 subunit beta OS=Homo sapiens GN=PRKCSH PE=1 SV=2 - [GLU2B_HUMAN]	0.732085	0.69382	PRKCSH
P20042	4	4	166.18	1.0279	Huh7	HLE	Eukaryotic translation initiation factor 2 subunit 2 OS=Homo sapiens GN=EIF2S2 PE=1 SV=2 - [IF2B_HUMAN]	0.732568	0.694544	EIF2S2
Q13151	7	6	439.95	1.02602	HLE	Huh7	Heterogeneous nuclear ribonucleoprotein A0 OS=Homo sapiens GN=HNRNPA0 PE=1 SV=1 - [ROA0_HUMAN]	0.735609	0.698228	HNRNPA0
P23284	12	12	947.02	1.02714	Huh7	HLE	Peptidyl-prolyl cis-trans isomerase B OS=Homo sapiens GN=PPIB PE=1 SV=2 - [PPIB_HUMAN]	0.739198	0.702171	PPIB
P13647	18	9	1161.3	1.19063	Huh7	HLE	Keratin, type II cytoskeletal 5 OS=Homo sapiens GN=KRT5 PE=1 SV=3 - [K2C5_HUMAN]	0.742067	0.705166	KRT5
Q9BV38	2	2	141.79	1.04768	HLE	Huh7	WD repeat-containing protein 18 OS=Homo sapiens GN=WDR18 PE=1 SV=2 - [WDR18_HUMAN]	0.746275	0.709435	WDR18
P46777	12	12	1031.87	1.01995	Huh7	HLE	60S ribosomal protein L5 OS=Homo sapiens GN=RPL5 PE=1 SV=3 - [RL5_HUMAN]	0.751127	0.714593	RPL5
O75533	18	17	948.22	1.02234	Huh7	HLE	Splicing factor 3B subunit 1 OS=Homo sapiens GN=SF3B1 PE=1 SV=3 - [SF3B1_HUMAN]	0.752117	0.715808	SF3B1
P61513	2	2	129.54	1.02543	Huh7	HLE	60S ribosomal protein L37a OS=Homo sapiens GN=RPL37A PE=1 SV=2 - [RL37A_HUMAN]	0.756291	0.720055	RPL37A
O76003	4	4	155.17	1.01626	Huh7	HLE	Glutaredoxin-3 OS=Homo sapiens GN=GLRX3 PE=1 SV=2 - [GLRX3_HUMAN]	0.757322	0.721312	GLRX3
P61254	4	4	191.23	1.03736	Huh7	HLE	60S ribosomal protein L26 OS=Homo sapiens GN=RPL26 PE=1 SV=1 - [RL26_HUMAN]	0.758325	0.722542	RPL26
Q08379	2	2	122.71	1.03738	Huh7	HLE	Golgin subfamily A member 2 OS=Homo sapiens GN=GOLGA2 PE=1 SV=3 - [GOGA2_HUMAN]	0.771144	0.735316	GOLGA2
O14737	4	4	403.46	1.01447	HLE	Huh7	Programmed cell death protein 5 OS=Homo sapiens GN=PDCD5 PE=1 SV=3 - [PDCD5_HUMAN]	0.773008	0.737935	PDCD5
P06493	10	8	527.98	1.01874	HLE	Huh7	Cyclin-dependent kinase 1 OS=Homo sapiens GN=CDK1 PE=1 SV=3 - [CDK1_HUMAN]	0.778097	0.743358	CDK1
Q5T749	3	3	166.03	2.06917	Huh7	HLE	Keratinocyte proline-rich protein OS=Homo sapiens GN=KPRP PE=1 SV=1 - [KPRP_HUMAN]	0.780231	0.74568	KPRP
Q4VC31	5	4	291.73	1.01039	HLE	Huh7	Coiled-coil domain-containing protein 58 OS=Homo sapiens GN=CCDC58 PE=1 SV=1 - [CCD58_HUMAN]	0.784291	0.749845	CCDC58
P26373	7	7	364.91	1.01379	HLE	Huh7	60S ribosomal protein L13 OS=Homo sapiens GN=RPL13 PE=1 SV=4 - [RL13_HUMAN]	0.784994	0.750802	RPL13
O76071	2	2	78.04	1.01457	HLE	Huh7	Probable cytosolic iron-sulfur protein assembly protein CIAO1 OS=Homo sapiens GN=CIAO1 PE=1 SV=1 - [CIAO1_HUMAN]	0.787047	0.753056	CIAO1
Q92905	2	2	95.48	1.0255	Huh7	HLE	COP9 signalosome complex subunit 5 OS=Homo sapiens GN=COPS5 PE=1 SV=4 - [CSN5_HUMAN]	0.787047	0.754194	COPS5
P57088	2	2	88.91	1.01409	HLE	Huh7	Transmembrane protein 33 OS=Homo sapiens GN=TMEM33 PE=1 SV=2 - [TMM33_HUMAN]	0.787047	0.75402	TMEM33
Q9BZZ5	4	4	224.43	1.02117	HLE	Huh7	Apoptosis inhibitor 5 OS=Homo sapiens GN=API5 PE=1 SV=3 - [API5_HUMAN]	0.787047	0.753652	API5
P62241	12	12	896.25	1.01202	HLE	Huh7	40S ribosomal protein S8 OS=Homo sapiens GN=RPS8 PE=1 SV=2 - [RS8_HUMAN]	0.787047	0.753989	RPS8
P50579	2	2	82.24	1.05606	HLE	Huh7	Methionine aminopeptidase 2 OS=Homo sapiens GN=METAP2 PE=1 SV=1 - [AMPM2_HUMAN]	0.788692	0.756629	METAP2
O00267	3	3	127.69	1.01954	Huh7	HLE	Transcription elongation factor SPT5 OS=Homo sapiens GN=SUPT5H PE=1 SV=1 - [SPT5H_HUMAN]	0.793301	0.761627	SUPT5H
P08559	4	4	195.56	1.0157	HLE	Huh7	Pyruvate dehydrogenase E1 component subunit alpha, somatic form, mitochondrial OS=Homo sapiens GN=PDHA1 PE=1 SV=3 - [ODPA_HUMAN]	0.797404	0.766434	PDHA1
Q9Y3B4	3	3	265.01	1.02196	Huh7	HLE	Pre-mRNA branch site protein p14 OS=Homo sapiens GN=SF3B14 PE=1 SV=1 - [PM14_HUMAN]	0.798738	0.768296	SF3B14
P28072	2	2	72.08	1.0319	Huh7	HLE	Proteasome subunit beta type-6 OS=Homo sapiens GN=PSMB6 PE=1 SV=4 - [PSB6_HUMAN]	0.802516	0.772377	PSMB6
Q9UL25	5	4	270.1	1.03246	Huh7	HLE	Ras-related protein Rab-21 OS=Homo sapiens GN=RAB21 PE=1 SV=3 - [RAB21_HUMAN]	0.802516	0.772513	RAB21
P39023	14	14	995.62	1.00756	Huh7	HLE	60S ribosomal protein L3 OS=Homo sapiens GN=RPL3 PE=1 SV=2 - [RL3_HUMAN]	0.803812	0.774052	RPL3
P13073	5	5	396.27	1.03174	Huh7	HLE	Cytochrome c oxidase subunit 4 isoform 1, mitochondrial OS=Homo sapiens GN=COX4I1 PE=1 SV=1 - [COX41_HUMAN]	0.811875	0.782111	COX4I1
Q9Y3F4	11	11	642.05	1.00917	HLE	Huh7	Serine-threonine kinase receptor-associated protein OS=Homo sapiens GN=STRAP PE=1 SV=1 - [STRAP_HUMAN]	0.8161	0.786774	STRAP
Q3MHD2	2	2	88.29	1.01387	Huh7	HLE	Protein LSM12 homolog OS=Homo sapiens GN=LSM12 PE=1 SV=2 - [LSM12_HUMAN]	0.821255	0.792042	LSM12
P52565	4	4	325.87	1.00811	HLE	Huh7	Rho GDP-dissociation inhibitor 1 OS=Homo sapiens GN=ARHGDIA PE=1 SV=3 - [GDIR1_HUMAN]	0.82522	0.796165	ARHGDIA
Q96M27	3	3	205.83	1.01031	Huh7	HLE	Protein PRRC1 OS=Homo sapiens GN=PRRC1 PE=1 SV=1 - [PRRC1_HUMAN]	0.830165	0.801876	PRRC1
P61353	5	5	200.18	1.02798	Huh7	HLE	60S ribosomal protein L27 OS=Homo sapiens GN=RPL27 PE=1 SV=2 - [RL27_HUMAN]	0.830186	0.802764	RPL27
P62750	7	7	605.31	1.02799	Huh7	HLE	60S ribosomal protein L23a OS=Homo sapiens GN=RPL23A PE=1 SV=1 - [RL23A_HUMAN]	0.833127	0.805911	RPL23A
Q04695	11	4	855.35	2.47075	HLE	Huh7	Keratin, type I cytoskeletal 17 OS=Homo sapiens GN=KRT17 PE=1 SV=2 - [K1C17_HUMAN]	0.833435	0.806511	KRT17
Q9NP77	2	2	61.88	1.0758	HLE	Huh7	RNA polymerase II subunit A C-terminal domain phosphatase SSU72 OS=Homo sapiens GN=SSU72 PE=1 SV=1 - [SSU72_HUMAN]	0.848429	0.821944	SSU72
Q07020	6	6	582.49	1.00226	HLE	Huh7	60S ribosomal protein L18 OS=Homo sapiens GN=RPL18 PE=1 SV=2 - [RL18_HUMAN]	0.852015	0.826037	RPL18
Q9Y3I0	5	5	208.5	1.01765	Huh7	HLE	tRNA-splicing ligase RtcB homolog OS=Homo sapiens GN=C22orf28 PE=1 SV=1 - [RTCB_HUMAN]	0.853731	0.82801	C22orf28
Q9NXF1	3	3	133.63	1.00575	HLE	Huh7	Testis-expressed sequence 10 protein OS=Homo sapiens GN=TEX10 PE=1 SV=2 - [TEX10_HUMAN]	0.861032	0.835717	TEX10
P13010	26	26	1894.41	1.0073	Huh7	HLE	X-ray repair cross-complementing protein 5 OS=Homo sapiens GN=XRCC5 PE=1 SV=3 - [XRCC5_HUMAN]	0.866543	0.841694	XRCC5
P62316	3	3	165.15	1.03344	HLE	Huh7	Small nuclear ribonucleoprotein Sm D2 OS=Homo sapiens GN=SNRPD2 PE=1 SV=1 - [SMD2_HUMAN]	0.868599	0.844007	SNRPD2
P49720	3	3	270.66	1.00609	HLE	Huh7	Proteasome subunit beta type-3 OS=Homo sapiens GN=PSMB3 PE=1 SV=2 - [PSB3_HUMAN]	0.871046	0.846701	PSMB3
A1L0T0	3	3	205.91	1.00582	Huh7	HLE	Acetolactate synthase-like protein OS=Homo sapiens GN=ILVBL PE=1 SV=2 - [ILVBL_HUMAN]	0.875253	0.851426	ILVBL
Q9UBB4	9	8	475.98	1.00377	HLE	Huh7	Ataxin-10 OS=Homo sapiens GN=ATXN10 PE=1 SV=1 - [ATX10_HUMAN]	0.877813	0.854235	ATXN10
P07910	12	12	1005.76	1.00639	HLE	Huh7	Heterogeneous nuclear ribonucleoproteins C1/C2 OS=Homo sapiens GN=HNRNPC PE=1 SV=4 - [HNRPC_HUMAN]	0.877865	0.854604	HNRNPC
Q86VP6	17	17	1001.26	1.01522	Huh7	HLE	Cullin-associated NEDD8-dissociated protein 1 OS=Homo sapiens GN=CAND1 PE=1 SV=2 - [CAND1_HUMAN]	0.882814	0.860383	CAND1
Q99613	11	11	542.2	1.00506	HLE	Huh7	Eukaryotic translation initiation factor 3 subunit C OS=Homo sapiens GN=EIF3C PE=1 SV=1 - [EIF3C_HUMAN]	0.883502	0.861375	EIF3C
P62753	5	5	492.22	1.01447	HLE	Huh7	40S ribosomal protein S6 OS=Homo sapiens GN=RPS6 PE=1 SV=1 - [RS6_HUMAN]	0.887844	0.866126	RPS6
A6NHR9	7	7	401.21	1.02058	Huh7	HLE	Structural maintenance of chromosomes flexible hinge domain-containing protein 1 OS=Homo sapiens GN=SMCHD1 PE=1 SV=2 - [SMHD1_HUMAN]	0.887844	0.866253	SMCHD1
P57740	2	2	119.81	1.02499	Huh7	HLE	Nuclear pore complex protein Nup107 OS=Homo sapiens GN=NUP107 PE=1 SV=1 - [NU107_HUMAN]	0.893037	0.871643	NUP107
P62249	9	9	677.79	1.01449	Huh7	HLE	40S ribosomal protein S16 OS=Homo sapiens GN=RPS16 PE=1 SV=2 - [RS16_HUMAN]	0.8968	0.875967	RPS16
Q86XP3	4	4	202.23	1.00397	HLE	Huh7	ATP-dependent RNA helicase DDX42 OS=Homo sapiens GN=DDX42 PE=1 SV=1 - [DDX42_HUMAN]	0.902737	0.882094	DDX42
P49792	6	6	295.11	1.01456	HLE	Huh7	E3 SUMO-protein ligase RanBP2 OS=Homo sapiens GN=RANBP2 PE=1 SV=2 - [RBP2_HUMAN]	0.904323	0.883971	RANBP2
P08779	16	10	1207.66	4.74511	HLE	Huh7	Keratin, type I cytoskeletal 16 OS=Homo sapiens GN=KRT16 PE=1 SV=4 - [K1C16_HUMAN]	0.906119	0.886056	KRT16
P09651	9	6	1108.42	1.00411	Huh7	HLE	Heterogeneous nuclear ribonucleoprotein A1 OS=Homo sapiens GN=HNRNPA1 PE=1 SV=5 - [ROA1_HUMAN]	0.910522	0.890692	HNRNPA1
Q5JRA6	2	2	113.71	1.24153	HLE	Huh7	Melanoma inhibitory activity protein 3 OS=Homo sapiens GN=MIA3 PE=1 SV=1 - [MIA3_HUMAN]	0.910899	0.891722	MIA3
P04264	30	25	2612.69	1.0955	Huh7	HLE	Keratin, type II cytoskeletal 1 OS=Homo sapiens GN=KRT1 PE=1 SV=6 - [K2C1_HUMAN]	0.910899	0.891613	KRT1
Q15287	2	2	111.22	1.00358	HLE	Huh7	RNA-binding protein with serine-rich domain 1 OS=Homo sapiens GN=RNPS1 PE=1 SV=1 - [RNPS1_HUMAN]	0.9166	0.897866	RNPS1
Q02978	9	9	524.78	1.00251	HLE	Huh7	Mitochondrial 2-oxoglutarate/malate carrier protein OS=Homo sapiens GN=SLC25A11 PE=1 SV=3 - [M2OM_HUMAN]	0.9166	0.897969	SLC25A11
Q9Y3D8	2	2	79.24	1.01029	Huh7	HLE	Adenylate kinase isoenzyme 6 OS=Homo sapiens GN=TAF9 PE=1 SV=1 - [KAD6_HUMAN]	0.918138	0.900475	TAF9
P49756	4	4	143.74	1.00706	HLE	Huh7	RNA-binding protein 25 OS=Homo sapiens GN=RBM25 PE=1 SV=3 - [RBM25_HUMAN]	0.918138	0.900215	RBM25
P35241	15	7	1032.96	1.00915	Huh7	HLE	Radixin OS=Homo sapiens GN=RDX PE=1 SV=1 - [RADI_HUMAN]	0.924148	0.907376	RDX
P40616	5	5	180.88	1.01489	Huh7	HLE	ADP-ribosylation factor-like protein 1 OS=Homo sapiens GN=ARL1 PE=1 SV=1 - [ARL1_HUMAN]	0.928596	0.912081	ARL1
P84103	4	3	330.44	1.01255	Huh7	HLE	Serine/arginine-rich splicing factor 3 OS=Homo sapiens GN=SRSF3 PE=1 SV=1 - [SRSF3_HUMAN]	0.928892	0.913045	SRSF3
P40429	7	7	300.27	1.00214	Huh7	HLE	60S ribosomal protein L13a OS=Homo sapiens GN=RPL13A PE=1 SV=2 - [RL13A_HUMAN]	0.928892	0.912793	RPL13A
P46379	2	2	89.36	1.01616	Huh7	HLE	Large proline-rich protein BAG6 OS=Homo sapiens GN=BAG6 PE=1 SV=2 - [BAG6_HUMAN]	0.933913	0.918998	BAG6
P46776	4	3	260.64	1.00117	Huh7	HLE	60S ribosomal protein L27a OS=Homo sapiens GN=RPL27A PE=1 SV=2 - [RL27A_HUMAN]	0.934724	0.920135	RPL27A
P27797	19	18	1515.94	1.00338	HLE	Huh7	Calreticulin OS=Homo sapiens GN=CALR PE=1 SV=1 - [CALR_HUMAN]	0.936498	0.922221	CALR
Q7Z3B4	2	2	94.4	1.00377	HLE	Huh7	Nucleoporin p54 OS=Homo sapiens GN=NUP54 PE=1 SV=2 - [NUP54_HUMAN]	0.937302	0.923693	NUP54
P13798	7	7	459.16	1.00096	Huh7	HLE	Acylamino-acid-releasing enzyme OS=Homo sapiens GN=APEH PE=1 SV=4 - [ACPH_HUMAN]	0.938116	0.924836	AH
Q9Y5X3	4	4	227.17	1.008	Huh7	HLE	Sorting nexin-5 OS=Homo sapiens GN=SNX5 PE=1 SV=1 - [SNX5_HUMAN]	0.946456	0.934432	SNX5
Q6NUQ4	2	2	82.55	1.01193	HLE	Huh7	Transmembrane protein 214 OS=Homo sapiens GN=TMEM214 PE=1 SV=2 - [TM214_HUMAN]	0.950044	0.939354	TMEM214
P10909	4	4	271.06	1.02318	Huh7	HLE	Clusterin OS=Homo sapiens GN=CLU PE=1 SV=1 - [CLUS_HUMAN]	0.953932	0.94389	CLU
P02533	20	9	1377.97	1.31303	HLE	Huh7	Keratin, type I cytoskeletal 14 OS=Homo sapiens GN=KRT14 PE=1 SV=4 - [K1C14_HUMAN]	0.95861	0.949564	KRT14
Q9C0C9	2	2	82.26	1.00702	HLE	Huh7	Ubiquitin-conjugating enzyme E2 O OS=Homo sapiens GN=UBE2O PE=1 SV=3 - [UBE2O_HUMAN]	0.966589	0.957818	UBE2O
O95831	11	11	649.93	1.00659	Huh7	HLE	Apoptosis-inducing factor 1, mitochondrial OS=Homo sapiens GN=AIFM1 PE=1 SV=1 - [AIFM1_HUMAN]	0.96776	0.95933	AIFM1
Q9Y2Q3	2	2	91	1.00276	Huh7	HLE	Glutathione S-transferase kappa 1 OS=Homo sapiens GN=GSTK1 PE=1 SV=3 - [GSTK1_HUMAN]	0.967902	0.959821	GSTK1
P36578	13	13	1053.69	1.00077	Huh7	HLE	60S ribosomal protein L4 OS=Homo sapiens GN=RPL4 PE=1 SV=5 - [RL4_HUMAN]	0.973253	0.965835	RPL4
Q7L5N1	2	2	69.74	1.00291	Huh7	HLE	COP9 signalosome complex subunit 6 OS=Homo sapiens GN=COPS6 PE=1 SV=1 - [CSN6_HUMAN]	0.981955	0.975183	COPS6
Q13247	4	3	223.35	1.03474	Huh7	HLE	Serine/arginine-rich splicing factor 6 OS=Homo sapiens GN=SRSF6 PE=1 SV=2 - [SRSF6_HUMAN]	0.982907	0.976485	SRSF6
Q9Y315	2	2	147.32	1.00419	Huh7	HLE	Putative deoxyribose-phosphate aldolase OS=Homo sapiens GN=DERA PE=1 SV=2 - [DEOC_HUMAN]	0.983131	0.977421	DERA
Q13045	4	3	187.85	1.00289	Huh7	HLE	Protein flightless-1 homolog OS=Homo sapiens GN=FLII PE=1 SV=2 - [FLII_HUMAN]	0.989747	0.985795	FLII
P23381	5	5	199.7	1.00544	HLE	Huh7	Tryptophan--tRNA ligase, cytoplasmic OS=Homo sapiens GN=WARS PE=1 SV=2 - [SYWC_HUMAN]	0.989835	0.986242	WARS
P61313	3	3	198.43	1.01693	HLE	Huh7	60S ribosomal protein L15 OS=Homo sapiens GN=RPL15 PE=1 SV=2 - [RL15_HUMAN]	0.990758	0.987881	RPL15
O60341	2	2	74.36	1.00757	HLE	Huh7	Lysine-specific histone demethylase 1A OS=Homo sapiens GN=KDM1A PE=1 SV=2 - [KDM1A_HUMAN]	0.991171	0.989013	KDM1A
Q15041	2	2	128.38	1.01427	Huh7	HLE	ADP-ribosylation factor-like protein 6-interacting protein 1 OS=Homo sapiens GN=ARL6IP1 PE=1 SV=2 - [AR6P1_HUMAN]	0.991571	0.989771	ARL6IP1
Q12905	15	15	1245.69	1.00415	Huh7	HLE	Interleukin enhancer-binding factor 2 OS=Homo sapiens GN=ILF2 PE=1 SV=2 - [ILF2_HUMAN]	0.992941	0.991499	ILF2
P16615	20	20	1485.72	1.00885	Huh7	HLE	Sarcoplasmic/endoplasmic reticulum calcium ATPase 2 OS=Homo sapiens GN=ATP2A2 PE=1 SV=1 - [AT2A2_HUMAN]	0.995859	0.995498	ATP2A2
